# Supplementary material for: Differential Gene Expression of Subcutaneous Adipose Tissue among Lean, Obese, and after RYGB (Different Timepoints): Systematic Review and Analysis
Source: MDPI journal article supplement (doi:10.3390/nu14224925), 2022-11-21
Supplement: s1 [file s1]

**Table S1. Characteristics of all the studies included in this systematic review.**

**Post-RYGB vs obese**

| Method                                       | Characteristics of the groups                            | Bariatric surgery data | BMI data (kg/m <sup>2</sup> )         | Gene expression fold change (Post-RYGB vs obese)                                                              |                                                                                       | Reference            |
|----------------------------------------------|----------------------------------------------------------|------------------------|---------------------------------------|---------------------------------------------------------------------------------------------------------------|---------------------------------------------------------------------------------------|----------------------|
|                                              | Patients data/ <b>Recruitment country</b>                |                        |                                       | Reported gene expression values (Obese; 8±5 months post-RYGB)                                                 | Calculated fold change [(Post-RYGB/Obese)-1]                                          |                      |
| <b>qPCR</b>                                  | <b>Obese:</b><br>19 obese of ≥ 18 years                  | RYGB                   | <b>Obese:</b><br>42± 5                | <b>Upregulated expression post-RYGB(+)</b>                                                                    |                                                                                       |                      |
| Candidate genes involved in:                 |                                                          | 8±5 months             | <b>Post-RYGB:</b><br>~32 ± 6          | <i>PLIN1 (1.00; 4.01)</i><br><i>HSL (1.00; 2.19)</i><br><i>CG158 (1.00; 2.19)</i><br><i>ATGL (1.00; 1.72)</i> | <b>Upregulated expression post-RYGB(+)</b>                                            | (Karki et al., 2015) |
| (a) Lipolysis<br>(b) Triglyceride metabolism | <b>Post-RYGB:</b><br>19 patients post-RYGB of ≥ 18 years | (3 a 15 months)        | <b>ΔBMI:</b><br>~10 kg/m <sup>2</sup> |                                                                                                               | <i>PLIN1 (3.01)</i><br><i>HSL (1.19)</i><br><i>CG158 (1.19)</i><br><i>ATGL (0.72)</i> |                      |
|                                              | <b>Boston, United States of America</b>                  |                        |                                       | Note: Approximate data of expression of the article                                                           |                                                                                       |                      |

**Post-RYGB vs obese**

| Method                                                             | Characteristics of the groups                               | Bariatric surgery data | BMI data (kg/m <sup>2</sup> )    | Gene expression fold change (Post-RYGB vs obese)                                                                                                                                                                                                                             |                                                                                                                       | Reference             |
|--------------------------------------------------------------------|-------------------------------------------------------------|------------------------|----------------------------------|------------------------------------------------------------------------------------------------------------------------------------------------------------------------------------------------------------------------------------------------------------------------------|-----------------------------------------------------------------------------------------------------------------------|-----------------------|
|                                                                    | Patients data/ <b>Recruitment country</b>                   |                        |                                  | Calculated fold change [(Post-RYGB/Obese)-1]                                                                                                                                                                                                                                 |                                                                                                                       |                       |
|                                                                    |                                                             |                        |                                  | <b>Upregulated expression post-RYGB(+)</b>                                                                                                                                                                                                                                   | <b>Downregulated expression post-RYGB(-)</b>                                                                          |                       |
| <b>qPCR</b>                                                        | <b>Obese:</b><br>17 Obese of 46 ± 10 years                  |                        | <b>Obese:</b><br>~45 ± 3         | <i>IL-6 (38.37)</i><br><i>IL-8 (19.75)</i><br><i>FASN (1.69)</i><br><i>AQP9 (1.45)</i><br><i>TNFα (0.86)</i><br><i>LBP (0.72)</i><br><i>SREBF1 (0.27)</i><br><i>PPARG (0.20)</i><br><i>SLC27A2 (0.07)</i><br><i>ACLY (0.06)</i><br><i>ELOVL6 (0.05)</i><br><i>LEP (0.02)</i> | <i>ADIPOQ (-0.38)</i><br><i>CEBPa (-0.28)</i><br><i>IRS-1 (-0.23)</i><br><i>GLUT4 (-0.23)</i><br><i>ACACA (-0.09)</i> |                       |
| Genes involved in:                                                 | <b>Post-RYGB:</b><br>17 patients post-RYGB of 46 ± 10 years | RYGB                   | <b>Post-RYGB:</b><br>Not changes |                                                                                                                                                                                                                                                                              |                                                                                                                       | (Ortega et al., 2016) |
| (a) Inflammation<br>(b) Lipid metabolism<br>(c) Glucose metabolism | <b>Barcelona, Spain</b>                                     | 90-120 min             | <b>ΔBMI:</b><br>Not changes      |                                                                                                                                                                                                                                                                              |                                                                                                                       |                       |

Genes, method, N, mean age, BMI (body mass index), reported or calculated fold change, upregulated or downregulated genes, reference. Highlighted genes are those found in the intersection of comparisons between post-RYGB vs obese and lean vs obese. Bold font appoints significance.

## Post-RYGB vs obese

| Method                                   | Characteristics of the groups                                                          | Bariatric surgery data | BMI data (kg/m <sup>2</sup> )                                             | Gene expression fold change (Post-RYGB vs obese)                                           |                                                                                             |                                                                         |                                                                                                                                             | Reference                  |
|------------------------------------------|----------------------------------------------------------------------------------------|------------------------|---------------------------------------------------------------------------|--------------------------------------------------------------------------------------------|---------------------------------------------------------------------------------------------|-------------------------------------------------------------------------|---------------------------------------------------------------------------------------------------------------------------------------------|----------------------------|
|                                          | Patients data/ <b>Recruitment country</b>                                              |                        |                                                                           | Reported gene expression values (Obese; 6 months post-RYGB)                                |                                                                                             | Calculated fold change [(Post-RYGB/Obese)-1]                            |                                                                                                                                             |                            |
| <b>qPCR</b>                              |                                                                                        |                        |                                                                           | Upregulated expression post-RYGB(+)                                                        | Downregulated expression post-RYGB (-)                                                      |                                                                         |                                                                                                                                             |                            |
| Validation by qPCR of genes involved in: | <b>Obese:</b><br>13 Obese of ~33±9 years                                               |                        | <b>Obese:</b><br>~45± 6                                                   |                                                                                            |                                                                                             |                                                                         |                                                                                                                                             |                            |
| (a) Energy metabolism                    | <b>Post-RYGB:</b><br>13 patients post-RYGB ~33±9 years<br><br><b>Sao Paulo, Brazil</b> | RYGB<br><br>6 months   | <b>Post-RYGB:</b><br>~35 ± 6<br><br><b>ΔBMI:</b><br>~10 kg/m <sup>2</sup> | <b>UCP2</b><br>(0.75; 1.27)<br><br>Note: Approximate values from the graphs in the article | <b>PLIN1</b><br>(1.16; 0.89)<br><br>Note: Approximate values from the graphs in the article | <b>Upregulated expression post-RYGB(+)</b><br><br><b>UCP2</b><br>(0.69) | <b>Downregulated expression post-RYGB (-)</b><br><br><b>PLIN1</b><br>(-0.23)<br><br>Note: Approximate values from the graphs in the article | (de Oliveira et al., 2017) |

## Post-RYGB vs obese

| Method                                   | Characteristics of the groups                          | Bariatric surgery data | BMI data (kg/m <sup>2</sup> )        | Gene expression fold change (Post-RYGB vs obese) |                      |                                       |                       | Reference                   |
|------------------------------------------|--------------------------------------------------------|------------------------|--------------------------------------|--------------------------------------------------|----------------------|---------------------------------------|-----------------------|-----------------------------|
|                                          | Patients data/ <b>Recruitment country</b>              |                        |                                      | Calculated fold change [(Post-RYGB/Obese)-1]     |                      |                                       |                       |                             |
|                                          |                                                        |                        |                                      | Upregulated expression post-RYGB (+)             |                      | Downregulated expression post-RYGB(-) |                       |                             |
| <b>qPCR</b>                              |                                                        |                        |                                      |                                                  |                      |                                       |                       |                             |
| Validation by qPCR of genes involved in: | <b>Obese:</b><br>11 Obese of ~55±9 years               |                        | <b>Obese:</b><br>~37± 4              | <b>ADIPOQ (3.81)</b>                             | ACACA (0.22)         |                                       |                       |                             |
| (a) Adipogenesis                         | <b>Post-RYGB:</b><br>11 patients post-RYGB ~55±9 years | RYGB<br><br>1 month    | <b>Post-RYGB:</b><br>~33 ± 3         | <b>PLIN1 (2.84)</b>                              | ACLY (0.22)          |                                       |                       |                             |
| (b) Oxidation of fatty acids             |                                                        |                        |                                      | <b>FABP4 (1.7)</b>                               | AKT1 (0.21)          |                                       | <b>IL-18 (-0.34)</b>  |                             |
| (c) Glucose metabolism                   | <b>Uppsala, Sweden</b>                                 |                        | <b>ΔBMI:</b><br>~4 kg/m <sup>2</sup> | <b>LIPE (1.12)</b>                               | <b>IRS-1 (0.2)</b>   |                                       | <b>MKI67 (-0.30)</b>  | (Katsogiannos et al., 2019) |
|                                          |                                                        |                        |                                      | <b>FAS (0.76)</b>                                | <b>CPT1A (0.16)</b>  |                                       | <b>E2F1 (-0.29)</b>   |                             |
|                                          |                                                        |                        |                                      | <b>CD36 (0.68)</b>                               | <b>SLC2A1 (0.15)</b> |                                       | <b>LEP (-0.25)</b>    |                             |
|                                          |                                                        |                        |                                      | <b>CPT1B (0.53)</b>                              | <b>CASP3 (0.15)</b>  |                                       | <b>ELOVL6 (-0.19)</b> |                             |
|                                          |                                                        |                        |                                      | <b>SLC2A4 (0.32)</b>                             | <b>LPL (0.09)</b>    |                                       | <b>SREBF1 (-0.19)</b> |                             |
|                                          |                                                        |                        |                                      | <b>CEBPB (0.24)</b>                              | <b>PNPLA2 (0.07)</b> |                                       | <b>TNFA (-0.15)</b>   |                             |
|                                          |                                                        |                        |                                      | <b>IL-6 (0.23)</b>                               |                      |                                       |                       |                             |
|                                          |                                                        |                        |                                      | <b>PPARG (0.22)</b>                              |                      |                                       |                       |                             |
|                                          |                                                        |                        |                                      | <b>CEBPA (0.06)</b>                              |                      |                                       |                       |                             |

Genes, method, N, mean age, BMI (body mass index), reported or calculated fold change, upregulated or downregulated genes, reference. Highlighted genes are those found in the intersection of comparisons between post-RYGB vs obese and lean vs obese. Bold font appoints significance.

## Post-RYGB vs obese

| Method                                                                                                  | Characteristics of the groups                                                        | Bariatric surgery data | BMI data (kg/m <sup>2</sup> )                                              | Gene expression fold change (Post-RYGB vs obese)                                                                                                                                                                                                                                                                              |                                       | Reference                                                |
|---------------------------------------------------------------------------------------------------------|--------------------------------------------------------------------------------------|------------------------|----------------------------------------------------------------------------|-------------------------------------------------------------------------------------------------------------------------------------------------------------------------------------------------------------------------------------------------------------------------------------------------------------------------------|---------------------------------------|----------------------------------------------------------|
|                                                                                                         | Patients data/ <b>Recruitment country</b>                                            |                        |                                                                            | Calculated fold change [(Post-RYGB/Obese)-1]                                                                                                                                                                                                                                                                                  |                                       |                                                          |
|                                                                                                         |                                                                                      |                        |                                                                            | Upregulated expression post-RYGB(+)                                                                                                                                                                                                                                                                                           | Downregulated expression post-RYGB(-) |                                                          |
| <b>qPCR</b>                                                                                             | <b>Obese:</b><br>12 obese of<br>55 ± 9 years                                         | RyGB                   | <b>Obese:</b><br>37 ± 4                                                    | <b>ADIPOQ (11.15)</b><br><b>FAS (4.67)</b><br><b>SLC2A4 (2.57)</b><br><b>FABP4 (1.91)</b><br><b>PPARG (1.14)</b><br><b>CPT1B (1.13)</b><br><b>CEBPA (0.88)</b><br><b>LIPE (0.86)</b><br><b>ELOVL6 (0.68)</b><br><b>IRS-1 (0.66)</b><br><b>CEBPB (0.64)</b><br><b>AKT1 (0.37)</b><br><b>SLC2A1 (0.28)</b><br><b>LEP (0.19)</b> | <b>E2F1 (-0.33)</b>                   | (Katsogiannos et al., 2019)                              |
| Candidate genes involved in:<br>a) Adipogenesis<br>b) Oxidation of fatty acids<br>c) Glucose metabolism | <b>Post-RYGB:</b><br>12 patients post-RYGB of<br>55 ± 9 years<br><br>Uppsala, Sweden | 6 months               | <b>Post-RYGB:</b><br>~29 ± 3<br><br><b>ΔBMI:</b><br>~8 kg/m <sup>2</sup> ; | Note: Upregulated expression involved in adipogenesis                                                                                                                                                                                                                                                                         |                                       | Note: Downregulated genes involved in cell proliferation |

## Post-RYGB vs obese

| Method                                                                                                                                                                                                                         | Characteristics of the groups                                                   | Bariatric surgery data | Patients data                                                | Gene expression fold change (Post-RYGB vs obese)                                                                                                                                                                                                                                                                                                                                                                                     |                                                                                                                                                                                                                                                                 | Reference                                                                                                                                                                                                                                                                                                                                  |                                                                                                                                                                                                                     |                               |
|--------------------------------------------------------------------------------------------------------------------------------------------------------------------------------------------------------------------------------|---------------------------------------------------------------------------------|------------------------|--------------------------------------------------------------|--------------------------------------------------------------------------------------------------------------------------------------------------------------------------------------------------------------------------------------------------------------------------------------------------------------------------------------------------------------------------------------------------------------------------------------|-----------------------------------------------------------------------------------------------------------------------------------------------------------------------------------------------------------------------------------------------------------------|--------------------------------------------------------------------------------------------------------------------------------------------------------------------------------------------------------------------------------------------------------------------------------------------------------------------------------------------|---------------------------------------------------------------------------------------------------------------------------------------------------------------------------------------------------------------------|-------------------------------|
|                                                                                                                                                                                                                                | Patients data/ <b>Recruitment country</b>                                       |                        |                                                              | Reported gene expression values (Obese; 3 months post-RYGB)                                                                                                                                                                                                                                                                                                                                                                          |                                                                                                                                                                                                                                                                 |                                                                                                                                                                                                                                                                                                                                            |                                                                                                                                                                                                                     |                               |
|                                                                                                                                                                                                                                |                                                                                 |                        |                                                              | Upregulated expression post-RYGB(+)                                                                                                                                                                                                                                                                                                                                                                                                  | Downregulated expression post-RYGB (-)                                                                                                                                                                                                                          | Calculated fold change [(Post-RYGB/Obese)-1]                                                                                                                                                                                                                                                                                               |                                                                                                                                                                                                                     |                               |
|                                                                                                                                                                                                                                |                                                                                 |                        |                                                              | Logarithmic conversion                                                                                                                                                                                                                                                                                                                                                                                                               | Logarithmic conversion                                                                                                                                                                                                                                          |                                                                                                                                                                                                                                                                                                                                            |                                                                                                                                                                                                                     |                               |
| <b>qPCR</b>                                                                                                                                                                                                                    | <b>Obese:</b><br>13 Obese of ~38±8 years                                        | RyGB                   | <b>Obese:</b><br>~42± 4                                      | <b>NRF2 (0.84; 4.50)</b><br><b>AMPK (0.92; 4.14)</b><br><b>ADIPOQ (0.80; 3.29)</b><br><b>SIRT1 (0.84; 3.29)</b><br><b>GNC2 (0.97; 3.07)</b><br><b>ATF4 (0.82; 2.55)</b><br><b>PGC1α (0.86; 2.28)</b><br><b>SIRT3 (0.81; 1.88)</b><br><b>SOD2 (0.93; 1.53)</b><br><b>ATF6 (0.6; 0.96)</b><br><b>CANX (0.59; 0.75)</b><br><b>SOD3 (0.78; 0.91)</b><br><b>CHOP (0.61; 0.71)</b><br><b>XBP1 (0.91; 0.97)</b><br><b>SOD1 (0.91; 0.95)</b> | <b>CALR (0.82; 0.05)</b><br><b>EIF2AK3 (0.85; 0.15)</b><br><b>MCP-1 (0.89; 0.25)</b><br><b>TNFA (0.79; 0.28)</b><br><b>IL-6 (0.86; 0.37)</b><br><b>PPARG (0.97; 0.45)</b><br><b>GRP78 (0.45; 0.25)</b><br><b>CCT4 (0.91; 0.8)</b><br><b>GADD34 (0.88; 0.84)</b> | <b>NRF2 (4.35)</b><br><b>AMPK (3.5)</b><br><b>ADIPOQ (3.11)</b><br><b>SIRT1 (2.94)</b><br><b>GNC2 (2.16)</b><br><b>ATF4 (2.12)</b><br><b>PGC1α (1.64)</b><br><b>SIRT3 (1.33)</b><br><b>SOD2 (0.65)</b><br><b>ATF6 (0.59)</b><br><b>CANX (0.27)</b><br><b>SOD3 (0.16)</b><br><b>CHOP (0.16)</b><br><b>XBP1 (0.06)</b><br><b>SOD1 (0.04)</b> | <b>CALR (-0.94)</b><br><b>EIF2AK3 (-0.83)</b><br><b>MCP-1 (-0.72)</b><br><b>TNFA (-0.64)</b><br><b>IL-6 (-0.57)</b><br><b>PPARG (-0.53)</b><br><b>GRP78 (-0.45)</b><br><b>CCT4 (-0.13)</b><br><b>GADD34 (-0.04)</b> | (Ferraz-Bannitz et al., 2021) |
| Validation by qPCR of genes involved in<br>(a) Inflammatory and anti-inflammatory cytokines<br>(b) Lipid transport<br>(c) Metabolic regulation<br>(d) In caloric restriction<br>(e)Glucose homeostasis<br>(f) Oxidative stress | <b>Post-RYGB:</b><br>13 patients of ~38±8 years<br><br><b>Sao Paulo, Brazil</b> | 3 months               | <b>Post-RYGB:</b><br>~36 ± 5<br><br><b>ΔBMI:</b><br>~6 kg/m² | Note: Approximate values from the graphs in the article                                                                                                                                                                                                                                                                                                                                                                              |                                                                                                                                                                                                                                                                 | Note: Approximate values from the graphs in the article                                                                                                                                                                                                                                                                                    |                                                                                                                                                                                                                     |                               |

Genes, method, N, mean age, BMI (body mass index), reported or calculated fold change, upregulated or downregulated genes, reference. Highlighted genes are those found in the intersection of comparisons between post-RYGB vs obese and lean vs obese. Bold font appoints significance.

## Post-RYGB vs obese

| Method                                           | Characteristics of the groups             | Bariatric surgery data | BMI data (kg/m <sup>2</sup> ) | Gene expression fold change (Post-RYGB vs obese)            |                                                |                                              | Reference                              |
|--------------------------------------------------|-------------------------------------------|------------------------|-------------------------------|-------------------------------------------------------------|------------------------------------------------|----------------------------------------------|----------------------------------------|
|                                                  | Patients data/ <b>Recruitment country</b> |                        |                               | Reported gene expression values (Obese; 6 months post-RYGB) |                                                |                                              |                                        |
|                                                  |                                           |                        |                               | Upregulated expression post-RYGB(+)                         | Downregulated expression post-RYGB (-)         | Calculated fold change [(Post-RYGB/Obese)-1] |                                        |
|                                                  |                                           |                        |                               | Logarithmic conversion                                      | Logarithmic conversion                         | Upregulated expression post-RYGB(+)          | Downregulated expression post-RYGB (-) |
| <b>qPCR</b>                                      | <b>Obese:</b><br>13 Obese of ~38±8 years  |                        | <b>Obese:</b><br>~42± 4       | <b>ADIPOQ (0.80; 4.89)</b>                                  |                                                | <b>ADIPOQ (5.11)</b>                         |                                        |
| (a) Validation by qPCR of genes involved in:     |                                           |                        |                               | <b>SIRT1 (0.84; 2.85)</b>                                   | <b>CALR (0.82; 0.14)</b>                       | <b>SIRT1 (2.41)</b>                          |                                        |
| (b) Inflammatory and anti-inflammatory cytokines |                                           |                        |                               | <b>NRF2 (0.84; 2.75)</b>                                    | <b>EIF2AK3 (0.85; 0.15)</b>                    | <b>NRF2 (2.27)</b>                           |                                        |
| (c) Lipid transport                              |                                           |                        |                               | <b>AMPK (0.92; 2.68)</b>                                    | <b>TNFα (0.79; 0.17)</b>                       | <b>AMPK (1.91)</b>                           | <b>CALR (-0.83)</b>                    |
| (d) Adipogenesis                                 |                                           |                        |                               | <b>GNC2 (0.97; 2.5)</b>                                     | <b>PPARG (0.97; 0.61)</b>                      | <b>GNC2 (1.57)</b>                           | <b>EIF2AK3 (-0.83)</b>                 |
| (e) Metabolic regulation                         |                                           |                        |                               | <b>ATF4 (0.82; 2.08)</b>                                    | <b>GADD34 (0.88; 0.59)</b>                     | <b>ATF4 (1.55)</b>                           | <b>TNFα (-0.79)</b>                    |
| (f) Amino acid metabolism                        |                                           |                        |                               | <b>PGC1α (0.86; 1.77)</b>                                   | <b>IL-6 (0.86; 0.66)</b>                       | <b>PGC1α (1.04)</b>                          | <b>PPARG (-0.37)</b>                   |
| (g) In caloric restriction                       |                                           |                        |                               | <b>SIRT3 (0.81; 1.59)</b>                                   | <b>SOD1 (0.91; 0.8)</b>                        | <b>SIRT3 (0.97)</b>                          | <b>GADD34 (-0.33)</b>                  |
| (h) Glucose homeostasis                          |                                           |                        |                               | <b>ATF6 (0.60; 1.19)</b>                                    | <b>CCT4 (0.91; 0.82)</b>                       | <b>ATF6 (0.97)</b>                           | <b>IL-6 (-0.23)</b>                    |
| (i) Oxidative stress                             |                                           |                        |                               | <b>GRP78 (0.45; 0.89)</b>                                   | <b>MCP-1 (0.89; 0.86)</b>                      | <b>GRP78 (0.97)</b>                          | <b>SOD1 (-0.12)</b>                    |
|                                                  |                                           |                        |                               | <b>CHOP (0.61; 1.14)</b>                                    |                                                | <b>CHOP (0.87)</b>                           | <b>CCT4 (-0.1)</b>                     |
|                                                  |                                           |                        |                               | <b>CANX (0.59; 0.82)</b>                                    |                                                | <b>CANX (0.39)</b>                           | <b>MCP-1 (-0.03)</b>                   |
|                                                  |                                           |                        |                               | <b>SOD2 (0.93; 1.15)</b>                                    |                                                | <b>SOD2 (0.24)</b>                           |                                        |
|                                                  |                                           |                        |                               | <b>XBP1 (0.91; 1.05)</b>                                    |                                                | <b>XBP1 (0.15)</b>                           |                                        |
|                                                  |                                           |                        |                               | <b>SOD3 (0.78; 0.81)</b>                                    |                                                | <b>SOD3 (0.04)</b>                           |                                        |
|                                                  |                                           |                        |                               | Note: Approximate values from article graphics              | Note: Approximate values from article graphics |                                              |                                        |

Genes, method, N, mean age, BMI (body mass index), reported or calculated fold change, upregulated or downregulated genes, reference. Highlighted genes are those found in the intersection of comparisons between post-RYGB vs obese and lean vs obese. Bold font appoints significance.

## Post-RYGB vs obese

| Method                                                                                                        | Characteristics of the groups                                         | Bariatric surgery data | BMI data (kg/m <sup>2</sup> )                   | Gene expression fold change (Post RYGB vs Obese)                                |                                                                                                                                                                               |                                                           |                                                              | Reference                     |
|---------------------------------------------------------------------------------------------------------------|-----------------------------------------------------------------------|------------------------|-------------------------------------------------|---------------------------------------------------------------------------------|-------------------------------------------------------------------------------------------------------------------------------------------------------------------------------|-----------------------------------------------------------|--------------------------------------------------------------|-------------------------------|
|                                                                                                               | Patients data/<br>Recruitment country                                 |                        |                                                 | Microarrays                                                                     |                                                                                                                                                                               | qPCR                                                      |                                                              |                               |
|                                                                                                               |                                                                       |                        |                                                 | Calculated fold change [(Post-RYGB/Obese)-1]                                    |                                                                                                                                                                               |                                                           |                                                              |                               |
|                                                                                                               |                                                                       |                        |                                                 | Downregulated expression post-RYGB(+)                                           | Downregulated expression post-RYGB(-)                                                                                                                                         | Downregulated expression post-RYGB(+)                     | Downregulated expression post-RYGB(-)                        |                               |
|                                                                                                               | Microarrays                                                           |                        | Microarrays                                     |                                                                                 |                                                                                                                                                                               |                                                           |                                                              |                               |
| . Microarrays                                                                                                 |                                                                       |                        |                                                 |                                                                                 |                                                                                                                                                                               |                                                           |                                                              |                               |
| SurePrint-G3 Human GE 8 x60 K microarray kit<br>62,000 transcripts                                            | Obese:<br>8 Obese of ~41±11 years<br><br>Post-RYGB:<br>8 patients     |                        | Obese:<br>~52± 7<br><br>Post-RYGB:<br>~34 ± 9   | 172 upregulated genes post-RYGB                                                 | 731 downregulated genes post-RYGB                                                                                                                                             |                                                           |                                                              |                               |
| qPCR                                                                                                          |                                                                       |                        | ΔBMI:<br>~18 kg/m <sup>2</sup> ;                | Validation genes:<br>FASN (4.94)<br>ACACA (2.13)<br>SCD1 (2.13)<br>IRS-1 (1.19) | Validation genes:<br>IL-6 (-57.67)<br>MSR1 (-10.69)<br>TNFα (-4.75)<br>FBP1 (-5.06)                                                                                           | FASN (5.88)<br>ACACA (2.13)<br>SCD1 (2.13)<br>IRS-1 (1.5) | IL-6 (-7.56)<br>MSR1 (-7.56)<br>TNFα (-2.88)<br>FBP1 (-3.50) | (González-Plaza et al., 2016) |
| Validation by qPCR of genes selected for antecedents of improving lipid metabolism and post-RYGB inflammation | qPCR                                                                  | RYGB                   | qPCR                                            |                                                                                 |                                                                                                                                                                               |                                                           |                                                              |                               |
|                                                                                                               | Obese:<br>20 obese of ~46 ± 10 years<br><br>Post-RYGB:<br>20 patients | ~2 years               | Obese:<br>~56 ± 7<br><br>Post-RYGB:<br>~39 ± 10 |                                                                                 | Note: Downregulated genes involved in:<br><br>(a) Immune system<br>(b) Inflammatory processes (immune response, stress response, cell death, response to endogenous stimulus) |                                                           |                                                              |                               |
|                                                                                                               | Malaga, Spain                                                         |                        | ΔBMI:<br>~17 kg/m <sup>2</sup> ;                | Note: Upregulated expression implied in:<br>(a) Biosynthetic processes          |                                                                                                                                                                               |                                                           |                                                              |                               |
| In addition, those that were differentially expressed in Microarrays were selected.                           |                                                                       |                        |                                                 | Note: Approximate values from the graphs in the article                         | Note: Approximate values from the graphs in the article                                                                                                                       | Note: Approximate values from the graphs in the article   | Note: Approximate values from the graphs in the article      |                               |

Genes, method, N, mean age, BMI (body mass index), reported or calculated fold change, upregulated or downregulated genes, reference. Highlighted genes are those found in the intersection of comparisons between post-RYGB vs obese and lean vs obese. Bold font appoints significance.

# Post-RYGB vs obese

| Method                                                                                                                                                                                                                                    | Characteristics of the groups                                                                                                                                            | Bariatric surgery data | BMI data (kg/m <sup>2</sup> )                                                                                                                                                                                                                                                                                                                                                        | Gene expression fold change (Post RYGB vs Obese)                                                                                                             |                                                                                                                                                                                                                                |                                                                                                               |                                                                                                                                                              | Reference                     |
|-------------------------------------------------------------------------------------------------------------------------------------------------------------------------------------------------------------------------------------------|--------------------------------------------------------------------------------------------------------------------------------------------------------------------------|------------------------|--------------------------------------------------------------------------------------------------------------------------------------------------------------------------------------------------------------------------------------------------------------------------------------------------------------------------------------------------------------------------------------|--------------------------------------------------------------------------------------------------------------------------------------------------------------|--------------------------------------------------------------------------------------------------------------------------------------------------------------------------------------------------------------------------------|---------------------------------------------------------------------------------------------------------------|--------------------------------------------------------------------------------------------------------------------------------------------------------------|-------------------------------|
|                                                                                                                                                                                                                                           | Patients data/ <b>Recruitment country</b>                                                                                                                                |                        |                                                                                                                                                                                                                                                                                                                                                                                      | Microarrays                                                                                                                                                  |                                                                                                                                                                                                                                | qPCR                                                                                                          |                                                                                                                                                              |                               |
|                                                                                                                                                                                                                                           |                                                                                                                                                                          |                        |                                                                                                                                                                                                                                                                                                                                                                                      | Calculated fold change [(Post-RYGB/Obese)-1]                                                                                                                 |                                                                                                                                                                                                                                |                                                                                                               |                                                                                                                                                              |                               |
|                                                                                                                                                                                                                                           |                                                                                                                                                                          |                        |                                                                                                                                                                                                                                                                                                                                                                                      | Upregulated expression post-RYGB(+)                                                                                                                          | Downregulated expression post-RYGB(-)                                                                                                                                                                                          | Upregulated expression post-RYGB(+)                                                                           | Downregulated expression post-RYGB(-)                                                                                                                        |                               |
|                                                                                                                                                                                                                                           | <b>Microarrays</b>                                                                                                                                                       |                        | <b>Microarrays</b>                                                                                                                                                                                                                                                                                                                                                                   | <i>Logarithmic conversion</i>                                                                                                                                | <i>Logarithmic conversion</i>                                                                                                                                                                                                  |                                                                                                               |                                                                                                                                                              |                               |
|                                                                                                                                                                                                                                           | <b>OBESE:</b><br>8 Obese<br>[4 down-insulin resistance (low-IR);<br>4 high-insulin resistance (high-IR)]                                                                 |                        | <b>OBESE</b><br><br><b>Low-IR:</b> ~49±5<br><b>High-IR:</b> ~52±7                                                                                                                                                                                                                                                                                                                    | <b>153 upregulated genes post-RYGB:</b><br><br><b>High-IR:</b><br><br><i>GLYCTK (2.18)</i><br><b><i>IRS-1 (1.27)</i></b><br><i>FADS1 (0.55)</i>              | <b>865 downregulated genes post-RYGB:</b><br><br><b>High-IR:</b><br><br><b><i>ITPKC(-7.18)</i></b><br><b><i>TNFα (-5.82)</i></b><br><b><i>LIF (-4.73)</i></b><br><i>UCHL1 (-4.36)</i><br><i>CCND1 (-2.36)</i>                  | <b>High-IR:</b><br><br><b><i>IRS-1 (2.73)</i></b><br><b><i>FADS1 (1.64)</i></b><br><i>GLYCTK (3.09)</i>       | <b>High-IR:</b><br><br><b><i>ITPKC (-5.27)</i></b><br><b><i>LIF (-4.73)</i></b><br><b><i>TNFα(-3.27)</i></b><br><i>UCHL1 (-4.10)</i><br><i>CCND1 (-2.55)</i> |                               |
| <b>Microarrays</b><br><br>SurePrint-G3<br>Human GE 8 x60<br>K microarray kit<br>>55,077<br>transcripts<br><br>Focus on genes involved in a state of low and high insulin resistance (IR), for a possible relationship with comorbidities. | <b>Low-IR:</b> ~39±13 years<br><b>High-IR:</b> ~43±11 years                                                                                                              |                        | <b>POST-RYGB:</b><br><br><b>Low-IR:</b> ~32±6<br><b>High-IR:</b> ~37±3                                                                                                                                                                                                                                                                                                               | <b>227 upregulated genes post-RYGB:</b><br><br><b>Low-IR:</b><br><br><b><i>GLYCTK (4.73)</i></b><br><b><i>FADS1 (2.55)</i></b><br><b><i>IRS-1 (1.27)</i></b> | <b>619 downregulated genes post-RYGB:</b><br><br><b>Low-IR:</b><br><br><b><i>UCHL1 (-8.55)</i></b><br><b><i>CCND1 (-5.09)</i></b><br><b><i>TNFα (-4.64)</i></b><br><i>ITPKC (-2.91)</i><br><i>LIF (-2.91)</i>                  | <b>Low-IR:</b><br><br><b><i>GLYCTK (4.55)</i></b><br><b><i>FADS1 (3.45)</i></b><br><b><i>IRS-1 (2.36)</i></b> | <b>Low-IR:</b><br><br><b><i>UCHL1(-6.00)</i></b><br><b><i>CCND1(-4.10)</i></b><br><b><i>TNFα(-2.91)</i></b><br><i>ITPKC (-5.27)</i><br><i>LIF (-2.91)</i>    | (González-Plaza et al., 2018) |
| <b>qPCR</b><br><br>Subsequent validation of genes identified.                                                                                                                                                                             | <b>qPCR</b><br><br><b>OBESE:</b><br><br>9 obese<br>(9 low-IR; 11 high-IR:)<br><br><b>Low-IR:</b> ~45±13 years<br><b>High-IR:</b> ~47±9 years<br><br><b>Malaga, Spain</b> | RYGB<br><br>~2 years   | <b>ΔBMI:</b><br><br><b>Low-IR:</b> ~17 kg/m <sup>2</sup><br><b>High-IR:</b> ~16 kg/m <sup>2</sup><br><br><b>qPCR</b><br><br><b>OBESE</b><br><br><b>Low-IR:</b> ~57±9<br><b>High-IR:</b> ~55±6<br><br><b>POST-RYGB:</b><br><br><b>Low-IR:</b> ~39±9<br><b>High-IR:</b> ~38±6<br><br><b>ΔBMI:</b><br><br><b>Low-IR:</b> ~18 kg/m <sup>2</sup><br><b>High-IR:</b> ~17 kg/m <sup>2</sup> | Note: In low-IR, genes involved in carbohydrate metabolic processes<br><br>Note: Approximate values from the graphs in the article                           | Note: In high-IR genes involved in cytokine-cytokine receptor, cancer chemokine signaling, and activation of transcription factors<br><br>In low-IR, genes involved in glycosaminoglycan metabolism and translation regulation | Note: Approximate values from the graphs in the article                                                       | Note: Approximate values from the graphs in the article                                                                                                      |                               |

Genes, method, N, mean age, BMI (body mass index), reported or calculated fold change, upregulated or downregulated genes, reference. Highlighted genes are those found in the intersection of comparisons between post-RYGB vs obese and lean vs obese. Bold font appoints significance.

| Method                                                                             | Characteristics of the groups                    | Bariatric surgery data | BMI data (kg/m <sup>2</sup> )         | Gene expression fold change<br>(Post RYGB vs Obese)                                                                                                                                                                                 |                                                        |                                                                                                                                                |                                                                    |                                       |                                                                                                                                                                                                                                                                                                                                                                       | Reference              |
|------------------------------------------------------------------------------------|--------------------------------------------------|------------------------|---------------------------------------|-------------------------------------------------------------------------------------------------------------------------------------------------------------------------------------------------------------------------------------|--------------------------------------------------------|------------------------------------------------------------------------------------------------------------------------------------------------|--------------------------------------------------------------------|---------------------------------------|-----------------------------------------------------------------------------------------------------------------------------------------------------------------------------------------------------------------------------------------------------------------------------------------------------------------------------------------------------------------------|------------------------|
|                                                                                    | Patients data/<br>Recruitment country            |                        |                                       | Microarrays                                                                                                                                                                                                                         | qPCR                                                   |                                                                                                                                                |                                                                    |                                       |                                                                                                                                                                                                                                                                                                                                                                       |                        |
|                                                                                    |                                                  |                        |                                       | Calculated fold change [(PostRYGB/Obese)-1]                                                                                                                                                                                         | Reported fold change values (Obese; 2 years post-RYGB) |                                                                                                                                                | Calculated fold change [(Post-RYGB/Obese)-1]                       |                                       |                                                                                                                                                                                                                                                                                                                                                                       |                        |
|                                                                                    |                                                  |                        |                                       |                                                                                                                                                                                                                                     | Upregulated expression post-RYGB(+)                    | Downregulated expression post-RYGB(-)                                                                                                          |                                                                    |                                       |                                                                                                                                                                                                                                                                                                                                                                       |                        |
|                                                                                    |                                                  |                        |                                       | Logarithmic conversion                                                                                                                                                                                                              |                                                        |                                                                                                                                                | Upregulated expression post-RYGB(+)                                | Downregulated expression post-RYGB(-) |                                                                                                                                                                                                                                                                                                                                                                       |                        |
| <u>Microarrays</u>                                                                 | <u>Microarrays</u>                               |                        | <u>Microarrays</u>                    | Downregulated expression post-RYGB(+)                                                                                                                                                                                               |                                                        | <i>IL-6</i><br><i>(0.01695; 0.0006)</i>                                                                                                        |                                                                    |                                       |                                                                                                                                                                                                                                                                                                                                                                       |                        |
| Affymetrix GeneChip Human Gene 2.0 ST Array                                        | <b>Obese:</b><br>16 obese of 48 ± 10 years       |                        | <b>Obese:</b><br>~46 ± 6              |                                                                                                                                                                                                                                     |                                                        | <i>TNFA</i><br><i>(0.00302; 0.00074)</i>                                                                                                       |                                                                    |                                       |                                                                                                                                                                                                                                                                                                                                                                       |                        |
| 13,885 transcripts post-RYGB VS obese (Ortega et al., 2015)                        | <b>Post-RYGB:</b><br>16 patients                 |                        | <b>Post-RYGB:</b><br>Not mentioned    | <i>TLR8 (-0.53)</i><br><i>TLR7 (-0.48)</i><br><i>TLR1 (-0.44)</i><br><i>TLR2 (-0.36)</i><br><i>TLR5 (-0.35)</i><br><i>TLR6 (-0.34)</i><br><i>TLR4 (-0.13)</i><br><i>TLR3 (-0.12)</i><br><i>TLR10 (-0.05)</i><br><i>TLR9 (-0.05)</i> |                                                        | <i>TLR8</i><br><i>(0.00032; 0.00011)</i>                                                                                                       |                                                                    |                                       | <i>IL-6</i><br><i>(-0.96)</i><br><i>TNFA</i><br><i>(-0.75)</i><br><i>TLR8</i><br><i>(-0.66)</i><br><i>LEP</i><br><i>(-0.66)</i><br><i>TLR1</i><br><i>(-0.51)</i><br><i>TLR7</i><br><i>(-0.37)</i><br><i>TLR4</i><br><i>(-0.33)</i><br><i>TLR5</i><br><i>(-0.32)</i><br><i>TLR2</i><br><i>(-0.3)</i><br><i>TLR6</i><br><i>(-0.28)</i><br><i>TLR3</i><br><i>(-0.18)</i> |                        |
|                                                                                    | <u>qPCR</u>                                      | RYGB<br>~2 years       | <u>qPCR</u>                           |                                                                                                                                                                                                                                     |                                                        | <i>LEP</i><br><i>(0.9706; 0.3327)</i>                                                                                                          |                                                                    |                                       |                                                                                                                                                                                                                                                                                                                                                                       |                        |
|                                                                                    | <b>Obese:</b><br>22 obese of 49 ± 8 years        |                        | <b>Obese:</b><br>~43 ± 5              |                                                                                                                                                                                                                                     | <i>GLUT4</i><br><i>(0.04472; 0.08758)</i>              | <i>TLR1</i><br><i>(0.01177; 0.00582)</i>                                                                                                       | <i>GLUT4 (0.96)</i><br><i>ADIPOQ (0.41)</i><br><i>IRS-1 (0.35)</i> |                                       |                                                                                                                                                                                                                                                                                                                                                                       |                        |
| Candidate genes involved in:<br>(a) Inflammatory<br>(b) Toll-like receptors (TLRs) | <b>Post-RYGB:</b><br>22 patients of 53 ± 8 years |                        | <b>Post-RYGB:</b><br>~30 ± 5          |                                                                                                                                                                                                                                     | <i>ADIPOQ</i><br><i>(3.24; 4.57)</i>                   | <i>TLR7</i><br><i>(0.00737; 0.00466)</i>                                                                                                       |                                                                    |                                       |                                                                                                                                                                                                                                                                                                                                                                       |                        |
|                                                                                    |                                                  |                        | <b>ΔBMI:</b><br>~13 kg/m <sup>2</sup> |                                                                                                                                                                                                                                     | <i>IRS-1</i><br><i>(0.0107; 0.01438)</i>               | <i>TLR4</i><br><i>(0.02932; 0.0196)</i>                                                                                                        |                                                                    |                                       |                                                                                                                                                                                                                                                                                                                                                                       |                        |
|                                                                                    | Barcelona, Spain                                 |                        |                                       |                                                                                                                                                                                                                                     |                                                        | <i>TLR5</i> (0.00398; 0.00269)<br><i>TLR2</i> (0.00821; 0.00575)<br><i>TLR6</i> (0.00666; 0.00482)<br><i>TLR3</i><br><i>(0.01014; 0.00828)</i> |                                                                    |                                       |                                                                                                                                                                                                                                                                                                                                                                       |                        |
|                                                                                    |                                                  |                        |                                       | Note: Microarray results from Ortega et al., 2015                                                                                                                                                                                   |                                                        |                                                                                                                                                |                                                                    |                                       |                                                                                                                                                                                                                                                                                                                                                                       | (Latorre et al., 2018) |

| Method                                                                                                                                                                                                                                                                                                                                                                                                          | Characteristics of the groups                                                                                                             | Bariatric surgery data | BMI data (kg/m <sup>2</sup> )                                                                                                                | Gene expression fold change (Post-RYGB vs obese)                                                                                                                                                                                                                                                                                                                                                                                                                                                                                            |                                                                                                                                                                                                                                                                                                                                                                                                                                                                                                                        |                                                                                                                                                                                                                                                                                                                                                                                                                                                                                                                                                  | Reference          |
|-----------------------------------------------------------------------------------------------------------------------------------------------------------------------------------------------------------------------------------------------------------------------------------------------------------------------------------------------------------------------------------------------------------------|-------------------------------------------------------------------------------------------------------------------------------------------|------------------------|----------------------------------------------------------------------------------------------------------------------------------------------|---------------------------------------------------------------------------------------------------------------------------------------------------------------------------------------------------------------------------------------------------------------------------------------------------------------------------------------------------------------------------------------------------------------------------------------------------------------------------------------------------------------------------------------------|------------------------------------------------------------------------------------------------------------------------------------------------------------------------------------------------------------------------------------------------------------------------------------------------------------------------------------------------------------------------------------------------------------------------------------------------------------------------------------------------------------------------|--------------------------------------------------------------------------------------------------------------------------------------------------------------------------------------------------------------------------------------------------------------------------------------------------------------------------------------------------------------------------------------------------------------------------------------------------------------------------------------------------------------------------------------------------|--------------------|
|                                                                                                                                                                                                                                                                                                                                                                                                                 | Patients data/<br>Recruitment country                                                                                                     |                        |                                                                                                                                              | Calculated fold change [(Post-RYGB/Obese)-1]                                                                                                                                                                                                                                                                                                                                                                                                                                                                                                |                                                                                                                                                                                                                                                                                                                                                                                                                                                                                                                        |                                                                                                                                                                                                                                                                                                                                                                                                                                                                                                                                                  |                    |
|                                                                                                                                                                                                                                                                                                                                                                                                                 |                                                                                                                                           |                        |                                                                                                                                              | Upregulated expression post-RYGB (+)                                                                                                                                                                                                                                                                                                                                                                                                                                                                                                        | Downregulated expression post-RYGB (-)                                                                                                                                                                                                                                                                                                                                                                                                                                                                                 |                                                                                                                                                                                                                                                                                                                                                                                                                                                                                                                                                  |                    |
| <p><b>. Microarrays</b></p> <p>Human HT12 v4.0 BeadChip 47,231 transcripts</p> <p>Selection of genes involved in:</p> <ul style="list-style-type: none"> <li>• Matrix fibers</li> <li>• Cross-linking enzymes</li> <li>• Profibrotic proteins</li> <li>• Glycosaminoglycan proteins</li> <li>• Multitensive glycoproteins</li> <li>• MMPs/TIMPs</li> </ul> <p>Post-transcriptional modification of collagen</p> | <p><b>Microarrays</b></p> <p><b>Obese:</b><br/>42 obese of ~43±11 years</p> <p><b>Post-RYGB:</b><br/>42 patients</p> <p>Paris, France</p> | RYGB                   | <p><b>Microarrays</b></p> <p><b>Obese:</b><br/>~47± 6</p> <p><b>Post-RYGB:</b><br/>~33 ± 5</p> <p><b>ΔBMI:</b><br/>~15 kg/m<sup>2</sup>;</p> | <p>4, 236 upregulated genes post-RYGB</p> <p><b>TIMP4 (0.52)</b></p> <p><b>LAMB1 (0.43)</b></p> <p>COL1A1 (0.36)</p> <p><b>COL6A3 (0.26)</b></p> <p><b>THBS2 (0.24)</b></p> <p><b>LAMA2 (0.17)</b></p> <p><b>P3H2 (0.16)</b></p> <p><b>ADAMTS9 (0.16)</b></p> <p>TGM2 (0.14)</p> <p>FBLN1 (0.14)</p> <p>TBHS4 (0.14)</p> <p><b>HSPG2 (0.1)</b></p> <p><b>LAMA3 (0.1)</b></p> <p>LAMA4 (0.1)</p> <p><b>P3H3 (0.09)</b></p> <p>COL4A2 (0.05)</p> <p>VIT (0.05)</p> <p>TGM3 (0.03)</p> <p>PLOD1 (0.03)</p> <p>MMP2 (0.03)</p> <p>LAMA5 (0)</p> | <p>2,989 downregulated genes post-RYGB</p> <p>MMP9 (-0.62)</p> <p>SPP1 (-0.59)</p> <p>LOX (-0.41)</p> <p>SPARC (-0.36)</p> <p>COL6A2 (-0.31)</p> <p>CTGF (-0.28)</p> <p>TIMP1 (-0.28)</p> <p>COL6A1 (-0.240)</p> <p>LOXL4 (-0.240)</p> <p>HSPA5 (-0.23)</p> <p>COL3A1 (-0.2)</p> <p>TGM1 (-0.17)</p> <p>TNC (-0.17)</p> <p>GLT25D1 (-0.16)</p> <p>HSP47 (-0.16)</p> <p>PLOD2 (-0.14)</p> <p>CANX (-0.14)</p> <p>ADAMTSL4 (-0.14)</p> <p>PDIA6 (-0.13)</p> <p>P4HA2 (-0.11)</p> <p>P4HB (-0.11)</p> <p>BMP1 (-0.11)</p> | <p><b>PLOD3 (-0.1)</b></p> <p><b>TIMP2 (-0.09)</b></p> <p><b>ADAMTS1 (-0.09)</b></p> <p><b>ADAMTS5 (-0.09)</b></p> <p><b>P4HA2 (-0.09)</b></p> <p><b>PDIA4 (-0.08)</b></p> <p><b>ELN (-0.07)</b></p> <p><b>THBS1 (-0.07)</b></p> <p><b>DNAJC10 (-0.07)</b></p> <p><b>P4HA1 (-0.05)</b></p> <p><b>P3H1 (-0.05)</b></p> <p><b>HSP90AA1 (-0.05)</b></p> <p><b>HSP90B1 (-0.05)</b></p> <p><b>ERP29 (-0.05)</b></p> <p><b>ADAMTS2 (-0.05)</b></p> <p><b>COL4A1 (-0.04)</b></p> <p><b>COL4A5 (-0.04)</b></p> <p>MMP11 (-0.02)</p> <p>LOXL1 (-0.02)</p> | (Liu et al., 2016) |
|                                                                                                                                                                                                                                                                                                                                                                                                                 |                                                                                                                                           |                        |                                                                                                                                              | Note: Approximate values from graphics in the article                                                                                                                                                                                                                                                                                                                                                                                                                                                                                       |                                                                                                                                                                                                                                                                                                                                                                                                                                                                                                                        | Note: Downregulated genes encoding cross-linking enzymes                                                                                                                                                                                                                                                                                                                                                                                                                                                                                         |                    |
|                                                                                                                                                                                                                                                                                                                                                                                                                 |                                                                                                                                           |                        |                                                                                                                                              |                                                                                                                                                                                                                                                                                                                                                                                                                                                                                                                                             |                                                                                                                                                                                                                                                                                                                                                                                                                                                                                                                        | Note: Approximate values from graphics in the article                                                                                                                                                                                                                                                                                                                                                                                                                                                                                            |                    |



## Post-RYGB vs obese

| Method                | Characteristics of the groups         | Bariatric surgery data | BMI data (kg/m <sup>2</sup> ) | Gene expression fold change (Post RYGB vs Obese)                                                     |                                       | Reference                                    |                   |                                      |                          |                       |
|-----------------------|---------------------------------------|------------------------|-------------------------------|------------------------------------------------------------------------------------------------------|---------------------------------------|----------------------------------------------|-------------------|--------------------------------------|--------------------------|-----------------------|
| qPCR                  | Patients data/Recruitment country     |                        |                               | Reported gene expression values (Obese; 1 week post-RYGB)                                            |                                       | Calculated fold change [(Post-RYGB/Obese)-1] |                   |                                      |                          |                       |
|                       |                                       |                        |                               | Upregulated expression post-RYGB (+)                                                                 |                                       |                                              |                   |                                      |                          |                       |
|                       |                                       |                        |                               | Validation by qPCR of genes involved in:<br><br>(a) Mitochondrial biogenesis<br>(b) Oxidative stress | Obese:<br>8 obese of<br>~50 ± 3 years | RYGB                                         | Obese:<br>~40 ± 2 | Upregulated expression post-RYGB (+) | (Jahansouz et al., 2015) |                       |
|                       |                                       |                        |                               |                                                                                                      |                                       |                                              |                   |                                      |                          | Post-RYGB:<br>~39 ± 2 |
|                       |                                       |                        |                               |                                                                                                      |                                       |                                              |                   |                                      |                          |                       |
| Post-RYGB:<br>~39 ± 2 |                                       |                        |                               |                                                                                                      |                                       |                                              |                   |                                      |                          |                       |
|                       | Obese:<br>8 obese of<br>~50 ± 3 years | RYGB                   | Obese:<br>~40 ± 2             | Obese:<br>~40 ± 2                                                                                    | Obese:<br>~40 ± 2                     |                                              |                   |                                      |                          |                       |
| Post-RYGB:<br>~39 ± 2 |                                       |                        |                               |                                                                                                      |                                       | RYGB                                         | Obese:<br>~40 ± 2 | Obese:<br>~40 ± 2                    |                          |                       |
|                       | Obese:<br>8 obese of<br>~50 ± 3 years | RYGB                   | Obese:<br>~40 ± 2             | Obese:<br>~40 ± 2                                                                                    | Obese:<br>~40 ± 2                     |                                              |                   |                                      |                          |                       |
| Post-RYGB:<br>~39 ± 2 |                                       |                        |                               |                                                                                                      |                                       | RYGB                                         | Obese:<br>~40 ± 2 | Obese:<br>~40 ± 2                    |                          |                       |
|                       | Obese:<br>8 obese of<br>~50 ± 3 years | RYGB                   | Obese:<br>~40 ± 2             | Obese:<br>~40 ± 2                                                                                    | Obese:<br>~40 ± 2                     |                                              |                   |                                      |                          |                       |
| Post-RYGB:<br>~39 ± 2 |                                       |                        |                               |                                                                                                      |                                       | RYGB                                         | Obese:<br>~40 ± 2 | Obese:<br>~40 ± 2                    |                          |                       |
|                       | Obese:<br>8 obese of<br>~50 ± 3 years | RYGB                   | Obese:<br>~40 ± 2             | Obese:<br>~40 ± 2                                                                                    | Obese:<br>~40 ± 2                     |                                              |                   |                                      |                          |                       |
| Post-RYGB:<br>~39 ± 2 |                                       |                        |                               |                                                                                                      |                                       | RYGB                                         | Obese:<br>~40 ± 2 | Obese:<br>~40 ± 2                    |                          |                       |
|                       | Obese:<br>8 obese of<br>~50 ± 3 years | RYGB                   | Obese:<br>~40 ± 2             | Obese:<br>~40 ± 2                                                                                    | Obese:<br>~40 ± 2                     |                                              |                   |                                      |                          |                       |
| Post-RYGB:<br>~39 ± 2 |                                       |                        |                               |                                                                                                      |                                       | RYGB                                         | Obese:<br>~40 ± 2 | Obese:<br>~40 ± 2                    |                          |                       |
|                       | Obese:<br>8 obese of<br>~50 ± 3 years | RYGB                   | Obese:<br>~40 ± 2             | Obese:<br>~40 ± 2                                                                                    | Obese:<br>~40 ± 2                     |                                              |                   |                                      |                          |                       |
| Post-RYGB:<br>~39 ± 2 |                                       |                        |                               |                                                                                                      |                                       | RYGB                                         | Obese:<br>~40 ± 2 | Obese:<br>~40 ± 2                    |                          |                       |
|                       | Obese:<br>8 obese of<br>~50 ± 3 years | RYGB                   | Obese:<br>~40 ± 2             | Obese:<br>~40 ± 2                                                                                    | Obese:<br>~40 ± 2                     |                                              |                   |                                      |                          |                       |
| Post-RYGB:<br>~39 ± 2 |                                       |                        |                               |                                                                                                      |                                       | RYGB                                         | Obese:<br>~40 ± 2 | Obese:<br>~40 ± 2                    |                          |                       |
|                       | Obese:<br>8 obese of<br>~50 ± 3 years | RYGB                   | Obese:<br>~40 ± 2             | Obese:<br>~40 ± 2                                                                                    | Obese:<br>~40 ± 2                     |                                              |                   |                                      |                          |                       |
| Post-RYGB:<br>~39 ± 2 |                                       |                        |                               |                                                                                                      |                                       | RYGB                                         | Obese:<br>~40 ± 2 | Obese:<br>~40 ± 2                    |                          |                       |
|                       | Obese:<br>8 obese of<br>~50 ± 3 years | RYGB                   | Obese:<br>~40 ± 2             | Obese:<br>~40 ± 2                                                                                    | Obese:<br>~40 ± 2                     |                                              |                   |                                      |                          |                       |
| Post-RYGB:<br>~39 ± 2 |                                       |                        |                               |                                                                                                      |                                       | RYGB                                         | Obese:<br>~40 ± 2 | Obese:<br>~40 ± 2                    |                          |                       |
|                       | Obese:<br>8 obese of<br>~50 ± 3 years | RYGB                   | Obese:<br>~40 ± 2             | Obese:<br>~40 ± 2                                                                                    | Obese:<br>~40 ± 2                     |                                              |                   |                                      |                          |                       |
| Post-RYGB:<br>~39 ± 2 |                                       |                        |                               |                                                                                                      |                                       | RYGB                                         | Obese:<br>~40 ± 2 | Obese:<br>~40 ± 2                    |                          |                       |
|                       | Obese:<br>8 obese of<br>~50 ± 3 years | RYGB                   | Obese:<br>~40 ± 2             | Obese:<br>~40 ± 2                                                                                    | Obese:<br>~40 ± 2                     |                                              |                   |                                      |                          |                       |
| Post-RYGB:<br>~39 ± 2 |                                       |                        |                               |                                                                                                      |                                       | RYGB                                         | Obese:<br>~40 ± 2 | Obese:<br>~40 ± 2                    |                          |                       |
|                       | Obese:<br>8 obese of<br>~50 ± 3 years | RYGB                   | Obese:<br>~40 ± 2             | Obese:<br>~40 ± 2                                                                                    | Obese:<br>~40 ± 2                     |                                              |                   |                                      |                          |                       |
| Post-RYGB:<br>~39 ± 2 |                                       |                        |                               |                                                                                                      |                                       | RYGB                                         | Obese:<br>~40 ± 2 | Obese:<br>~40 ± 2                    |                          |                       |
|                       | Obese:<br>8 obese of<br>~50 ± 3 years | RYGB                   | Obese:<br>~40 ± 2             | Obese:<br>~40 ± 2                                                                                    | Obese:<br>~40 ± 2                     |                                              |                   |                                      |                          |                       |
| Post-RYGB:<br>~39 ± 2 |                                       |                        |                               |                                                                                                      |                                       | RYGB                                         | Obese:<br>~40 ± 2 | Obese:<br>~40 ± 2                    |                          |                       |
|                       | Obese:<br>8 obese of<br>~50 ± 3 years | RYGB                   | Obese:<br>~40 ± 2             | Obese:<br>~40 ± 2                                                                                    | Obese:<br>~40 ± 2                     |                                              |                   |                                      |                          |                       |
| Post-RYGB:<br>~39 ± 2 |                                       |                        |                               |                                                                                                      |                                       | RYGB                                         | Obese:<br>~40 ± 2 | Obese:<br>~40 ± 2                    |                          |                       |
|                       | Obese:<br>8 obese of<br>~50 ± 3 years | RYGB                   | Obese:<br>~40 ± 2             | Obese:<br>~40 ± 2                                                                                    | Obese:<br>~40 ± 2                     |                                              |                   |                                      |                          |                       |
| Post-RYGB:<br>~39 ± 2 |                                       |                        |                               |                                                                                                      |                                       | RYGB                                         | Obese:<br>~40 ± 2 | Obese:<br>~40 ± 2                    |                          |                       |
|                       | Obese:<br>8 obese of<br>~50 ± 3 years | RYGB                   | Obese:<br>~40 ± 2             | Obese:<br>~40 ± 2                                                                                    | Obese:<br>~40 ± 2                     |                                              |                   |                                      |                          |                       |
| Post-RYGB:<br>~39 ± 2 |                                       |                        |                               |                                                                                                      |                                       | RYGB                                         | Obese:<br>~40 ± 2 | Obese:<br>~40 ± 2                    |                          |                       |
|                       | Obese:<br>8 obese of<br>~50 ± 3 years | RYGB                   | Obese:<br>~40 ± 2             | Obese:<br>~40 ± 2                                                                                    | Obese:<br>~40 ± 2                     |                                              |                   |                                      |                          |                       |
| Post-RYGB:<br>~39 ± 2 |                                       |                        |                               |                                                                                                      |                                       | RYGB                                         | Obese:<br>~40 ± 2 | Obese:<br>~40 ± 2                    |                          |                       |
|                       | Obese:<br>8 obese of<br>~50 ± 3 years | RYGB                   | Obese:<br>~40 ± 2             | Obese:<br>~40 ± 2                                                                                    | Obese:<br>~40 ± 2                     |                                              |                   |                                      |                          |                       |
| Post-RYGB:<br>~39 ± 2 |                                       |                        |                               |                                                                                                      |                                       | RYGB                                         | Obese:<br>~40 ± 2 | Obese:<br>~40 ± 2                    |                          |                       |
|                       | Obese:<br>8 obese of<br>~50 ± 3 years | RYGB                   | Obese:<br>~40 ± 2             | Obese:<br>~40 ± 2                                                                                    | Obese:<br>~40 ± 2                     |                                              |                   |                                      |                          |                       |
| Post-RYGB:<br>~39 ± 2 |                                       |                        |                               |                                                                                                      |                                       | RYGB                                         | Obese:<br>~40 ± 2 | Obese:<br>~40 ± 2                    |                          |                       |
|                       | Obese:<br>8 obese of<br>~50 ± 3 years | RYGB                   | Obese:<br>~40 ± 2             | Obese:<br>~40 ± 2                                                                                    | Obese:<br>~40 ± 2                     |                                              |                   |                                      |                          |                       |
| Post-RYGB:<br>~39 ± 2 |                                       |                        |                               |                                                                                                      |                                       | RYGB                                         | Obese:<br>~40 ± 2 | Obese:<br>~40 ± 2                    |                          |                       |
|                       | Obese:<br>8 obese of<br>~50 ± 3 years | RYGB                   | Obese:<br>~40 ± 2             | Obese:<br>~40 ± 2                                                                                    | Obese:<br>~40 ± 2                     |                                              |                   |                                      |                          |                       |
| Post-RYGB:<br>~39 ± 2 |                                       |                        |                               |                                                                                                      |                                       | RYGB                                         | Obese:<br>~40 ± 2 | Obese:<br>~40 ± 2                    |                          |                       |
|                       | Obese:<br>8 obese of<br>~50 ± 3 years | RYGB                   | Obese:<br>~40 ± 2             | Obese:<br>~40 ± 2                                                                                    | Obese:<br>~40 ± 2                     |                                              |                   |                                      |                          |                       |
| Post-RYGB:<br>~39 ± 2 |                                       |                        |                               |                                                                                                      |                                       | RYGB                                         | Obese:<br>~40 ± 2 | Obese:<br>~40 ± 2                    |                          |                       |
|                       | Obese:<br>8 obese of<br>~50 ± 3 years | RYGB                   | Obese:<br>~40 ± 2             | Obese:<br>~40 ± 2                                                                                    | Obese:<br>~40 ± 2                     |                                              |                   |                                      |                          |                       |
| Post-RYGB:<br>~39 ± 2 |                                       |                        |                               |                                                                                                      |                                       | RYGB                                         | Obese:<br>~40 ± 2 | Obese:<br>~40 ± 2                    |                          |                       |
|                       | Obese:<br>8 obese of<br>~50 ± 3 years | RYGB                   | Obese:<br>~40 ± 2             | Obese:<br>~40 ± 2                                                                                    | Obese:<br>~40 ± 2                     |                                              |                   |                                      |                          |                       |
| Post-RYGB:<br>~39 ± 2 |                                       |                        |                               |                                                                                                      |                                       | RYGB                                         | Obese:<br>~40 ± 2 | Obese:<br>~40 ± 2                    |                          |                       |
|                       | Obese:<br>8 obese of<br>~50 ± 3 years | RYGB                   | Obese:<br>~40 ± 2             | Obese:<br>~40 ± 2                                                                                    | Obese:<br>~40 ± 2                     |                                              |                   |                                      |                          |                       |
| Post-RYGB:<br>~39 ± 2 |                                       |                        |                               |                                                                                                      |                                       | RYGB                                         | Obese:<br>~40 ± 2 | Obese:<br>~40 ± 2                    |                          |                       |
|                       | Obese:<br>8 obese of<br>~50 ± 3 years | RYGB                   | Obese:<br>~40 ± 2             | Obese:<br>~40 ± 2                                                                                    | Obese:<br>~40 ± 2                     |                                              |                   |                                      |                          |                       |
| Post-RYGB:<br>~39 ± 2 |                                       |                        |                               |                                                                                                      |                                       | RYGB                                         | Obese:<br>~40 ± 2 | Obese:<br>~40 ± 2                    |                          |                       |
|                       | Obese:<br>8 obese of<br>~50 ± 3 years | RYGB                   | Obese:<br>~40 ± 2             | Obese:<br>~40 ± 2                                                                                    | Obese:<br>~40 ± 2                     |                                              |                   |                                      |                          |                       |
| Post-RYGB:<br>~39 ± 2 |                                       |                        |                               |                                                                                                      |                                       | RYGB                                         | Obese:<br>~40 ± 2 | Obese:<br>~40 ± 2                    |                          |                       |
|                       | Obese:<br>8 obese of<br>~50 ± 3 years | RYGB                   | Obese:<br>~40 ± 2             | Obese:<br>~40 ± 2                                                                                    | Obese:<br>~40 ± 2                     |                                              |                   |                                      |                          |                       |
| Post-RYGB:<br>~39 ± 2 |                                       |                        |                               |                                                                                                      |                                       | RYGB                                         | Obese:<br>~40 ± 2 | Obese:<br>~40 ± 2                    |                          |                       |
|                       | Obese:<br>8 obese of<br>~50 ± 3 years | RYGB                   | Obese:<br>~40 ± 2             | Obese:<br>~40 ± 2                                                                                    | Obese:<br>~40 ± 2                     |                                              |                   |                                      |                          |                       |
| Post-RYGB:<br>~39 ± 2 |                                       |                        |                               |                                                                                                      |                                       | RYGB                                         | Obese:<br>~40 ± 2 | Obese:<br>~40 ± 2                    |                          |                       |
|                       | Obese:<br>8 obese of<br>~50 ± 3 years | RYGB                   | Obese:<br>~40 ± 2             | Obese:<br>~40 ± 2                                                                                    | Obese:<br>~40 ± 2                     |                                              |                   |                                      |                          |                       |
| Post-RYGB:<br>~39 ± 2 |                                       |                        |                               |                                                                                                      |                                       | RYGB                                         | Obese:<br>~40 ± 2 | Obese:<br>~40 ± 2                    |                          |                       |
|                       | Obese:<br>8 obese of<br>~50 ± 3 years | RYGB                   | Obese:<br>~40 ± 2             | Obese:<br>~40 ± 2                                                                                    | Obese:<br>~40 ± 2                     |                                              |                   |                                      |                          |                       |
| Post-RYGB:<br>~39 ± 2 |                                       |                        |                               |                                                                                                      |                                       | RYGB                                         | Obese:<br>~40 ± 2 | Obese:<br>~40 ± 2                    |                          |                       |
|                       | Obese:<br>8 obese of<br>~50 ± 3 years | RYGB                   | Obese:<br>~40 ± 2             | Obese:<br>~40 ± 2                                                                                    | Obese:<br>~40 ± 2                     |                                              |                   |                                      |                          |                       |
| Post-RYGB:<br>~39 ± 2 |                                       |                        |                               |                                                                                                      |                                       | RYGB                                         | Obese:<br>~40 ± 2 | Obese:<br>~40 ± 2                    |                          |                       |
|                       | Obese:<br>8 obese of<br>~50 ± 3 years | RYGB                   | Obese:<br>~40 ± 2             | Obese:<br>~40 ± 2                                                                                    | Obese:<br>~40 ± 2                     |                                              |                   |                                      |                          |                       |
| Post-RYGB:<br>~39 ± 2 |                                       |                        |                               |                                                                                                      |                                       | RYGB                                         | Obese:<br>~40 ± 2 | Obese:<br>~40 ± 2                    |                          |                       |
|                       | Obese:<br>8 obese of<br>~50 ± 3 years | RYGB                   | Obese:<br>~40 ± 2             | Obese:<br>~40 ± 2                                                                                    | Obese:<br>~40 ± 2                     |                                              |                   |                                      |                          |                       |
| Post-RYGB:<br>~39 ± 2 |                                       |                        |                               |                                                                                                      |                                       | RYGB                                         | Obese:<br>~40 ± 2 | Obese:<br>~40 ± 2                    |                          |                       |
|                       | Obese:<br>8 obese of<br>~50 ± 3 years | RYGB                   | Obese:<br>~40 ± 2             | Obese:<br>~40 ± 2                                                                                    | Obese:<br>~40 ± 2                     |                                              |                   |                                      |                          |                       |
| Post-RYGB:<br>~39 ± 2 |                                       |                        |                               |                                                                                                      |                                       | RYGB                                         | Obese:<br>~40 ± 2 | Obese:<br>~40 ± 2                    |                          |                       |
|                       | Obese:<br>8 obese of<br>~50 ± 3 years | RYGB                   | Obese:<br>~40 ± 2             | Obese:<br>~40 ± 2                                                                                    | Obese:<br>~40 ± 2                     |                                              |                   |                                      |                          |                       |
| Post-RYGB:<br>~39 ± 2 |                                       |                        |                               |                                                                                                      |                                       | RYGB                                         | Obese:<br>~40 ± 2 | Obese:<br>~40 ± 2                    |                          |                       |
|                       | Obese:<br>8 obese of<br>~50 ± 3 years | RYGB                   | Obese:<br>~40 ± 2             | Obese:<br>~40 ± 2                                                                                    | Obese:<br>~40 ± 2                     |                                              |                   |                                      |                          |                       |
| Post-RYGB:<br>~39 ± 2 |                                       |                        |                               |                                                                                                      |                                       | RYGB                                         | Obese:<br>~40 ± 2 | Obese:<br>~40 ± 2                    |                          |                       |
|                       | Obese:<br>8 obese of<br>~50 ± 3 years | RYGB                   | Obese:<br>~40 ± 2             | Obese:<br>~40 ± 2                                                                                    | Obese:<br>~40 ± 2                     |                                              |                   |                                      |                          |                       |
| Post-RYGB:<br>~39 ± 2 |                                       |                        |                               |                                                                                                      |                                       | RYGB                                         | Obese:<br>~40 ± 2 | Obese:<br>~40 ± 2                    |                          |                       |
|                       | Obese:<br>8 obese of<br>~50 ± 3 years | RYGB                   | Obese:<br>~40 ± 2             | Obese:<br>~40 ± 2                                                                                    | Obese:<br>~40 ± 2                     |                                              |                   |                                      |                          |                       |
| Post-RYGB:<br>~39 ± 2 |                                       |                        |                               |                                                                                                      |                                       | RYGB                                         | Obese:<br>~40 ± 2 | Obese:<br>~40 ± 2                    |                          |                       |
|                       | Obese:<br>8 obese of<br>~50 ± 3 years | RYGB                   | Obese:<br>~40 ± 2             | Obese:<br>~40 ± 2                                                                                    | Obese:<br>~40 ± 2                     |                                              |                   |                                      |                          |                       |
| Post-RYGB:<br>~39 ± 2 |                                       |                        |                               |                                                                                                      |                                       | RYGB                                         | Obese:<br>~40 ± 2 | Obese:<br>~40 ± 2                    |                          |                       |
|                       | Obese:<br>8 obese of<br>~50 ± 3 years | RYGB                   | Obese:<br>~40 ± 2             | Obese:<br>~40 ± 2                                                                                    | Obese:<br>~40 ± 2                     |                                              |                   |                                      |                          |                       |
| Post-RYGB:<br>~39 ± 2 |                                       |                        |                               |                                                                                                      |                                       | RYGB                                         | Obese:<br>~40 ± 2 | Obese:<br>~40 ± 2                    |                          |                       |
|                       | Obese:<br>8 obese of<br>~50 ± 3 years | RYGB                   | Obese:<br>~40 ± 2             | Obese:<br>~40 ± 2                                                                                    | Obese:<br>~40 ± 2                     |                                              |                   |                                      |                          |                       |
| Post-RYGB:<br>~39 ± 2 |                                       |                        |                               |                                                                                                      |                                       | RYGB                                         | Obese:<br>~40 ± 2 | Obese:<br>~40 ± 2                    |                          |                       |
|                       | Obese:<br>8 obese of<br>~50 ± 3 years | RYGB                   | Obese:<br>~40 ± 2             | Obese:<br>~40 ± 2                                                                                    | Obese:<br>~40 ± 2                     |                                              |                   |                                      |                          |                       |
| Post-RYGB:<br>~39 ± 2 |                                       |                        |                               |                                                                                                      |                                       | RYGB                                         | Obese:<br>~40 ± 2 | Obese:<br>~40 ± 2                    |                          |                       |
|                       | Obese:<br>8 obese of<br>~50 ± 3 years | RYGB                   | Obese:<br>~40 ± 2             | Obese:<br>~40 ± 2                                                                                    | Obese:<br>~40 ± 2                     |                                              |                   |                                      |                          |                       |
| Post-RYGB:<br>~39 ± 2 |                                       |                        |                               |                                                                                                      |                                       | RYGB                                         | Obese:<br>~40 ± 2 | Obese:<br>~40 ± 2                    |                          |                       |
|                       | Obese:<br>8 obese of<br>~50 ± 3 years | RYGB                   | Obese:<br>~40 ± 2             | Obese:<br>~40 ± 2                                                                                    | Obese:<br>~40 ± 2                     |                                              |                   |                                      |                          |                       |
| Post-RYGB:<br>~39 ± 2 |                                       |                        |                               |                                                                                                      |                                       | RYGB                                         | Obese:<br>~40 ± 2 | Obese:<br>~40 ± 2                    |                          |                       |
|                       | Obese:<br>8 obese of<br>~50 ± 3 years | RYGB                   | Obese:<br>~40 ± 2             | Obese:<br>~40 ± 2                                                                                    | Obese:<br>~40 ± 2                     |                                              |                   |                                      |                          |                       |
| Post-RYGB:<br>~39 ± 2 |                                       |                        |                               |                                                                                                      |                                       | RYGB                                         | Obese:<br>~40 ± 2 | Obese:<br>~40 ± 2                    |                          |                       |
|                       | Obese:<br>8 obese of<br>~50 ± 3 years | RYGB                   | Obese:<br>~40 ± 2             | Obese:<br>~40 ± 2                                                                                    | Obese:<br>~40 ± 2                     |                                              |                   |                                      |                          |                       |
| Post-RYGB:<br>~39 ± 2 |                                       |                        |                               |                                                                                                      |                                       | RYGB                                         | Obese:<br>~40 ± 2 | Obese:<br>~40 ± 2                    |                          |                       |
|                       | Obese:<br>8 obese of<br>~50 ± 3 years | RYGB                   | Obese:<br>~40 ± 2             | Obese:<br>~40 ± 2                                                                                    | Obese:<br>~40 ± 2                     |                                              |                   |                                      |                          |                       |
| Post-RYGB:<br>~39 ± 2 |                                       |                        |                               |                                                                                                      |                                       | RYGB                                         | Obese:<br>~40 ± 2 | Obese:<br>~40 ± 2                    |                          |                       |
|                       | Obese:<br>8 obese of<br>~50 ± 3 years | RYGB                   | Obese:<br>~40 ± 2             | Obese:<br>~40 ± 2                                                                                    | Obese:<br>~40 ± 2                     |                                              |                   |                                      |                          |                       |
| Post-RYGB:<br>~39 ± 2 |                                       |                        |                               |                                                                                                      |                                       | RYGB                                         | Obese:<br>~40 ± 2 | Obese:<br>~40 ± 2                    |                          |                       |
|                       | Obese:<br>8 obese of<br>~50 ± 3 years | RYGB                   | Obese:<br>~40 ± 2             | Obese:<br>~40 ± 2                                                                                    | Obese:<br>~40 ± 2                     |                                              |                   |                                      |                          |                       |
| Post-RYGB:<br>~39 ± 2 |                                       |                        |                               |                                                                                                      |                                       | RYGB                                         | Obese:<br>~40 ± 2 | Obese:<br>~40 ± 2                    |                          |                       |
|                       | Obese:<br>8 obese of<br>~50 ± 3 years | RYGB                   | Obese:<br>~40 ± 2             | Obese:<br>~40 ± 2                                                                                    | Obese:<br>~40 ± 2                     |                                              |                   |                                      |                          |                       |
| Post-RYGB:<br>~39 ± 2 |                                       |                        |                               |                                                                                                      |                                       | RYGB                                         | Obese:<br>~40 ± 2 | Obese:<br>~40 ± 2                    |                          |                       |
|                       | Obese:<br>8 obese of<br>~50 ± 3 years | RYGB                   | Obese:<br>~40 ± 2             | Obese:<br>~40 ± 2                                                                                    | Obese:<br>~40 ± 2                     |                                              |                   |                                      |                          |                       |
| Post-RYGB:<br>~39 ± 2 |                                       |                        |                               |                                                                                                      |                                       | RYGB                                         | Obese:<br>~40 ± 2 | Obese:<br>~40 ± 2                    |                          |                       |
|                       | Obese:<br>8 obese of<br>~50 ± 3 years | RYGB                   | Obese:<br>~40 ± 2             | Obese:<br>~40 ± 2                                                                                    | Obese:<br>~40 ± 2                     |                                              |                   |                                      |                          |                       |
| Post-RYGB:<br>~39 ± 2 |                                       |                        |                               |                                                                                                      |                                       | RYGB                                         | Obese:<br>~40 ± 2 | Obese:<br>~40 ± 2                    |                          |                       |
|                       | Obese:<br>8 obese of<br>~50 ± 3 years | RYGB                   | Obese:<br>~40 ± 2             | Obese:<br>~40 ± 2                                                                                    | Obese:<br>~40 ± 2                     |                                              |                   |                                      |                          |                       |
| Post-RYGB:<br>~39 ± 2 |                                       |                        |                               |                                                                                                      |                                       | RYGB                                         | Obese:<br>~40 ± 2 | Obese:<br>~40 ± 2                    |                          |                       |
|                       | Obese:<br>8 obese of<br>~50 ± 3 years | RYGB                   | Obese:<br>~40 ± 2             | Obese:<br>~40 ± 2                                                                                    | Obese:<br>~40 ± 2                     |                                              |                   |                                      |                          |                       |
| Post-RYGB:<br>~39 ± 2 |                                       |                        |                               |                                                                                                      |                                       | RYGB                                         | Obese:<br>~40 ± 2 | Obese:<br>~40 ± 2                    |                          |                       |
|                       | Obese:<br>8 obese of<br>~50 ± 3 years | RYGB                   | Obese:<br>~40 ± 2             | Obese:<br>~40 ± 2                                                                                    | Obese:<br>~40 ± 2                     |                                              |                   |                                      |                          |                       |
| Post-RYGB:<br>~39 ± 2 |                                       |                        |                               |                                                                                                      |                                       | RYGB                                         | Obese:<br>~40 ± 2 | Obese:<br>~40 ± 2                    |                          |                       |
|                       | Obese:<br>8 obese of<br>~50 ± 3 years | RYGB                   | Obese:<br>~40 ± 2             | Obese:<br>~40 ± 2                                                                                    | Obese:<br>~40 ± 2                     |                                              |                   |                                      |                          |                       |
| Post-RYGB:<br>~39 ± 2 |                                       |                        |                               |                                                                                                      |                                       | RYGB                                         | Obese:<br>~40 ± 2 | Obese:<br>~40 ± 2                    |                          |                       |
|                       | Obese:<br>8 obese of<br>~50 ± 3 years | RYGB                   | Obese:<br>~40 ± 2             | Obese:<br>~40 ± 2                                                                                    | Obese:<br>~40 ± 2                     |                                              |                   |                                      |                          |                       |
| Post-RYGB:<br>~39 ± 2 |                                       |                        |                               |                                                                                                      |                                       | RYGB                                         | Obese:<br>~40 ± 2 | Obese:<br>~40 ± 2                    |                          |                       |
|                       | Obese:<br>8 obese of<br>~50 ± 3 years | RYGB                   | Obese:<br>~40 ± 2             | Obese:<br>~40 ± 2                                                                                    | Obese:<br>~40 ± 2                     |                                              |                   |                                      |                          |                       |
| Post-RYGB:<br>~39 ± 2 |                                       |                        |                               |                                                                                                      |                                       | RYGB                                         | Obese:<br>~40 ± 2 | Obese:<br>~40 ± 2                    |                          |                       |
|                       | Obese:<br>8 obese of<br>~50 ± 3 years | RYGB                   | Obese:<br>~40 ± 2             | Obese:<br>~40 ± 2                                                                                    | Obese:<br>~40 ± 2                     |                                              |                   |                                      |                          |                       |
| Post-RYGB:<br>~39 ± 2 |                                       |                        |                               |                                                                                                      |                                       | RYGB                                         | Obese:<br>~40 ± 2 | Obese:<br>~40 ± 2                    |                          |                       |
|                       | Obese:<br>8 obese of<br>~50 ± 3 years | RYGB                   | Obese:<br>~40 ± 2             | Obese:<br>~40 ± 2                                                                                    | Obese:<br>~40 ± 2                     |                                              |                   |                                      |                          |                       |
| Post-RYGB:<br>~39 ± 2 |                                       |                        |                               |                                                                                                      |                                       | RYGB                                         | Obese:<br>~40 ± 2 | Obese:<br>~40 ± 2                    |                          |                       |
|                       | Obese:<br>8 obese of<br>~50 ± 3 years | RYGB                   | Obese:<br>~40 ± 2             | Obese:<br>~40 ± 2                                                                                    | Obese:<br>~40 ± 2                     |                                              |                   |                                      |                          |                       |
| Post-RYGB:<br>~39 ± 2 |                                       |                        |                               |                                                                                                      |                                       | RYGB                                         | Obese:<br>~40 ± 2 | Obese:<br>~40 ± 2                    |                          |                       |
|                       | Obese:<br>8 obese of<br>~50 ± 3 years | RYGB                   | Obese:<br>~40 ± 2             | Obese:<br>~40 ± 2                                                                                    | Obese:<br>~40 ± 2                     |                                              |                   |                                      |                          |                       |
| Post-RYGB:<br>~39 ± 2 |                                       |                        |                               |                                                                                                      |                                       | RYGB                                         | Obese:<br>~40 ± 2 | Obese:<br>~40 ± 2                    |                          |                       |
|                       | Obese:<br>8 obese of<br>~50 ± 3 years | RYGB                   | Obese:<br>~40 ± 2             | Obese:<br>~40 ± 2                                                                                    | Obese:<br>~40 ± 2                     |                                              |                   |                                      |                          |                       |
| Post-RYGB:<br>~39 ± 2 |                                       |                        |                               |                                                                                                      |                                       | RYGB                                         | Obese:<br>~40 ± 2 | Obese:<br>~40 ± 2                    |                          |                       |
|                       | Obese:<br>8 obese of<br>~50 ± 3 years | RYGB                   | Obese:<br>~40 ± 2             | Obese:<br>~40 ± 2                                                                                    | Obese:<br>~40 ± 2                     |                                              |                   |                                      |                          |                       |
| Post-RYGB:<br>~39 ± 2 |                                       |                        |                               |                                                                                                      |                                       | RYGB                                         | Obese:<br>~40 ± 2 | Obese:<br>~40 ± 2                    |                          |                       |
|                       | Obese:<br>8 obese of<br>~50 ± 3 years | RYGB                   | Obese:<br>~40 ± 2             | Obese:<br>~40 ± 2                                                                                    | Obese:<br>~40 ± 2                     |                                              |                   |                                      |                          |                       |
| Post-RYGB:<br>~39 ± 2 |                                       |                        |                               |                                                                                                      |                                       | RYGB                                         | Obese:<br>~40 ± 2 | Obese:<br>~40 ± 2                    |                          |                       |
|                       | Obese:<br>8 obese of<br>~50 ± 3 years | RYGB                   | Obese:<br>~40 ± 2             | Obese:<br>~40 ± 2                                                                                    | Obese:<br>~40 ± 2                     |                                              |                   |                                      |                          |                       |
| Post-RYGB:<br>~39 ± 2 |                                       |                        |                               |                                                                                                      |                                       | RYGB                                         | Obese:<br>~40 ± 2 | Obese:<br>~40 ± 2                    |                          |                       |
|                       | Obese:<br>8 obese of<br>~50 ± 3 years | RYGB                   | Obese:<br>~40 ± 2             | Obese:<br>~40 ± 2                                                                                    | Obese:<br>~40 ± 2                     |                                              |                   |                                      |                          |                       |
| Post-RYGB:<br>~39 ± 2 |                                       |                        |                               |                                                                                                      |                                       | RYGB                                         | Obese:<br>~40 ± 2 | Obese:<br>~40 ± 2                    |                          |                       |
|                       | Obese:<br>8 obese of<br>~50 ± 3 years | RYGB                   | Obese:<br>~40 ± 2             | Obese:<br>~40 ± 2                                                                                    | Obese:<br>~40 ± 2                     |                                              |                   |                                      |                          |                       |
| Post-RYGB:<br>~39 ± 2 |                                       |                        |                               |                                                                                                      |                                       | RYGB                                         | Obese:<br>~40 ± 2 | Obese:<br>~40 ± 2                    |                          |                       |
|                       | Obese:<br>8 obese of<br>~50 ± 3 years | RYGB                   | Obese:<br>~40 ± 2             | Obese:<br>~40 ± 2                                                                                    | Obese:<br>~40 ± 2                     |                                              |                   |                                      |                          |                       |
| Post-RYGB:<br>~39 ± 2 |                                       |                        |                               |                                                                                                      |                                       | RYGB                                         | Obese:<br>~40 ± 2 | Obese:<br>~40 ± 2                    |                          |                       |
|                       | Obese:<br>8 obese of<br>~50 ± 3 years | RYGB                   | Obese:<br>~40 ± 2             | Obese:<br>~40 ± 2                                                                                    | Obese:<br>~40 ± 2                     |                                              |                   |                                      |                          |                       |
| Post-RYGB:<br>~39 ± 2 |                                       |                        |                               |                                                                                                      |                                       | RYGB                                         |                   |                                      |                          |                       |

## Lean vs obese

| Method                       | Characteristics of the groups                    |                                          | Gene expression fold change<br>(Lean vs Obese)                                     |                                 | Reference                                                       |                             |
|------------------------------|--------------------------------------------------|------------------------------------------|------------------------------------------------------------------------------------|---------------------------------|-----------------------------------------------------------------|-----------------------------|
|                              | Patients<br>data/ <b>Recruitment<br/>country</b> | BMI<br>(kg/m <sup>2</sup> )              | Reported gene expression values<br>(Obese; Lean)                                   |                                 | Calculated fold change<br>[(Lean/Obese)-1]                      |                             |
|                              |                                                  |                                          | Upregulated expression in lean                                                     | Downregulated genes in lean (-) |                                                                 |                             |
| <b>qPCR</b>                  | Lean:<br>8 lean of 45 ± 6 years                  |                                          |                                                                                    |                                 | Downregulated genes<br>in lean (-)                              |                             |
| Candidate genes involved in: |                                                  |                                          |                                                                                    |                                 |                                                                 |                             |
| (a) Mitochondrial biogenesis | <b>Obese:</b><br>16 obese of 46 ± 3<br>years     | <b>Lean:</b><br>24±0.9 kg/m <sup>2</sup> | <i>CytC</i> (0.040; 1.00)<br><i>eNOS</i> (0.20; 1.00)<br><i>NRF1</i> (0.260; 1.00) | Not reported                    | <i>CytC</i> (24.00)<br><i>eNOS</i> (4.00)<br><i>NRF1</i> (2.85) | (Jahansouz<br>et al., 2015) |
| (b) Oxidative stress         |                                                  | <b>Obese:</b><br>41± 1 kg/m <sup>2</sup> | <i>TFAM</i> (0.48; 1.00)<br><i>PGC1α</i> (0.60; 1.00)                              |                                 | <i>TFAM</i> (1.08)<br><i>PGC1α</i> (0.67)                       |                             |
|                              | <b>Minnesota, United<br/>States of America</b>   |                                          |                                                                                    |                                 |                                                                 |                             |
|                              |                                                  |                                          | Note: Approximate values from<br>article graphics                                  |                                 |                                                                 |                             |

Genes, method, N, mean age, BMI (body mass index), reported or calculated fold change, upregulated or downregulated genes, reference. Highlighted genes are those found in the intersection of comparisons between post-RYGB vs obese and lean vs obese. Bold font appoints significance.

## Post-RYGB vs obese

| Method                               | Characteristics of the groups             | Bariatric surgery data | BMI data (kg/m <sup>2</sup> )           | Gene expression fold change (Post-RYGB vs Obese)                   |                                                                                                                                                                                                    | Reference                                                                                                                                                                                                                                                                                                                                                                                                                                                                                                                                                                             |
|--------------------------------------|-------------------------------------------|------------------------|-----------------------------------------|--------------------------------------------------------------------|----------------------------------------------------------------------------------------------------------------------------------------------------------------------------------------------------|---------------------------------------------------------------------------------------------------------------------------------------------------------------------------------------------------------------------------------------------------------------------------------------------------------------------------------------------------------------------------------------------------------------------------------------------------------------------------------------------------------------------------------------------------------------------------------------|
|                                      | Patients data/<br>Recruitment country     |                        |                                         | Reported gene expression values (Obese; 1 year post-RYGB)          |                                                                                                                                                                                                    |                                                                                                                                                                                                                                                                                                                                                                                                                                                                                                                                                                                       |
|                                      |                                           |                        |                                         | Upregulated expression post-RYGB (+)                               | Downregulated expression post-RYGB (-)                                                                                                                                                             | Calculated fold change [(Post-RYGB/Obese)-1]                                                                                                                                                                                                                                                                                                                                                                                                                                                                                                                                          |
| <b>qPCR</b>                          |                                           |                        |                                         |                                                                    |                                                                                                                                                                                                    |                                                                                                                                                                                                                                                                                                                                                                                                                                                                                                                                                                                       |
| Candidate genes involved in:         | <b>Obese:</b><br>26 obese of ~42±12 years |                        | <b>Obese:</b><br>~46± 6                 |                                                                    | <b>IL-6 (1.00; 0)</b><br><i>FGF1 (1.00; 0.01)</i><br><i>IRS-2 (1.00; 0.07)</i><br><i>CCL3 (1.00; 0.09)</i><br><i>IL-10 (1.02; 0.10)</i><br><b>PPARG (1.01; 0.11)</b><br><b>ADIPOQ (1.00; 0.12)</b> | <b>Upregulated expression post-RYGB(+)</b><br><br><br><br><br><br><br><br><br><br><b>Downregulated expression post-RYGB(-)</b><br><br><br><br><br><br><br><br><br><br><b>IL-6 (-1.00)</b><br><i>FGF1 (-0.99)</i><br><i>IRS-2 (-0.93)</i><br><i>CCL3 (-0.91)</i><br><i>IL-10 (-0.9)</i><br><b>PPARG (-0.89)</b><br><b>ADIPOQ (-0.88)</b><br><i>IL1B (-0.88)</i><br><i>CD68 (-0.87)</i><br><i>CIDEA (-0.87)</i><br><i>PLIN1 (-0.87)</i><br><i>IGF1 (-0.81)</i><br><i>CD144 (-0.73)</i><br><b>SLC2A4 (-0.69)</b><br><i>HLA-DR (-0.57)</i><br><i>CD3E (-0.55)</i><br><b>VEGFC (-0.04)</b> |
| (a) Inflammatory cytokines           | <b>Post-RYGB:</b><br>26 patients          | RYGB                   | <b>Post-RYGB:</b><br>~31 ± 6            |                                                                    |                                                                                                                                                                                                    |                                                                                                                                                                                                                                                                                                                                                                                                                                                                                                                                                                                       |
| (b) Growth factors                   | of ~43±12 years                           | ~1 year                | <b>ΔBMI:</b><br>~15 kg/m <sup>2</sup> ; | <b>TNFα (1.00; 2.72)</b>                                           | <i>CD144 (0.92; 0.25)</i>                                                                                                                                                                          |                                                                                                                                                                                                                                                                                                                                                                                                                                                                                                                                                                                       |
| (c) Metabolic markers (lipolysis)    |                                           |                        |                                         | <b>CASP3 (1.00; 1.64)</b>                                          | <b>SLC2A4 (1.01; 0.31)</b>                                                                                                                                                                         |                                                                                                                                                                                                                                                                                                                                                                                                                                                                                                                                                                                       |
| (d) Cell surface markers (apoptosis) | <b>Vienna, Austria</b>                    |                        |                                         | <i>CD40 (0.97; 1.02)</i>                                           | <i>HLA-DR (0.92; 0.40)</i><br><i>CD3E (0.94; 0.42)</i><br><b>VEGFC (1.00; 0.96)</b>                                                                                                                |                                                                                                                                                                                                                                                                                                                                                                                                                                                                                                                                                                                       |
|                                      |                                           |                        |                                         |                                                                    | Note: Of the genes downregulated post-RYGB, 4 are metabolic markers.                                                                                                                               |                                                                                                                                                                                                                                                                                                                                                                                                                                                                                                                                                                                       |
|                                      |                                           |                        |                                         | Note: Values calculated from the graphs of the article (without %) | Note: Values calculated from the graphs of the article (without %)                                                                                                                                 | (Jürets et al., 2017)                                                                                                                                                                                                                                                                                                                                                                                                                                                                                                                                                                 |

Genes, method, N, mean age, BMI (body mass index), reported or calculated fold change, upregulated or downregulated genes, reference. Highlighted genes are those found in the intersection of comparisons between post-RYGB vs obese and lean vs obese. Bold font appoints significance.

## Lean vs obese

| Method                                                                                                                                          | Characteristics of the groups                                               |                             | Gene expression fold change<br>(Lean vs Obese)                                                                                                                                                                                      |                                                                                                                                                                                                                                                                                                                                                                                                     | Reference                                                                                                                                                                                                                                                                                                                                |
|-------------------------------------------------------------------------------------------------------------------------------------------------|-----------------------------------------------------------------------------|-----------------------------|-------------------------------------------------------------------------------------------------------------------------------------------------------------------------------------------------------------------------------------|-----------------------------------------------------------------------------------------------------------------------------------------------------------------------------------------------------------------------------------------------------------------------------------------------------------------------------------------------------------------------------------------------------|------------------------------------------------------------------------------------------------------------------------------------------------------------------------------------------------------------------------------------------------------------------------------------------------------------------------------------------|
|                                                                                                                                                 | Patients<br>data/ <b>Recruitment<br/>country</b>                            | BMI<br>(kg/m <sup>2</sup> ) | Reported gene expression values<br>( <b>Obese; Lean</b> )                                                                                                                                                                           |                                                                                                                                                                                                                                                                                                                                                                                                     | Calculated fold change<br>[(Lean/Obese)-1]                                                                                                                                                                                                                                                                                               |
|                                                                                                                                                 |                                                                             |                             | Upregulated expression in<br>lean (+)                                                                                                                                                                                               | Downregulated expression<br>in lean (-)                                                                                                                                                                                                                                                                                                                                                             |                                                                                                                                                                                                                                                                                                                                          |
|                                                                                                                                                 |                                                                             |                             |                                                                                                                                                                                                                                     |                                                                                                                                                                                                                                                                                                                                                                                                     | Upregulated<br>expression in lean(+)      Downregulated<br>expression in lean (-)                                                                                                                                                                                                                                                        |
| <b>qPCR</b>                                                                                                                                     | <b>qPCR</b>                                                                 | <b>qPCR</b>                 |                                                                                                                                                                                                                                     |                                                                                                                                                                                                                                                                                                                                                                                                     |                                                                                                                                                                                                                                                                                                                                          |
| Candidate genes<br>involved in:                                                                                                                 | <b>Lean:</b><br>20 lean of 43 ± 9 years                                     | <b>Lean:</b><br>~25 ± 3     | <i>CIDEA</i> (1.00; 1.52)<br><i>CD40</i> (1.00; 1.17)<br><i>ADIPOQ</i> (1.00; 1.13)<br><i>SLC2A4</i> (1.00; 1.10)<br><i>IGF1</i> (1.00; 1.08)<br><i>IRS-2</i> (1.00; 1.08)<br><i>PLIN1</i> (1.00; 1.04)<br><i>CD3E</i> (1.00; 1.03) | <b><i>IL-6</i> (1.00; 0.17)</b><br><b><i>IL-10</i> (1.00; 0.37)</b><br><b><i>FGF1</i> (1.00; 0.42)</b><br><i>CCL3</i> (1.00; 0.5)<br><b><i>IL1B</i> (1.00; 0.50)</b><br><b><i>CASP3</i> (1.00; 0.66)</b><br><i>CD68</i> (1.00; 0.70)<br><i>HLA-DR</i> (1.00; 0.75)<br><i>CD144</i> (1.00; 0.75)<br><i>VEGFC</i> (1.00; 0.75)<br><b><i>PPARG</i> (1.00; 0.88)</b><br><b><i>TNFα</i> (1.00; 0.92)</b> | <i>CIDEA</i> (0.52)<br><i>CD40</i> (0.17)<br><i>ADIPOQ</i> (0.13)<br><i>SLC2A4</i> (0.10)<br><i>IGF1</i> (0.08)<br><i>IRS-2</i> (0.08)<br><i>PLIN1</i> (0.04)<br><i>CD3E</i> (0.03)                                                                                                                                                      |
| (a) Inflammatory<br>cytokines<br>(b) Growth factors<br>(c) Metabolic markers<br>(lipids and glucose)<br>(d) Cell surface<br>markers (apoptosis) | <b>Obese:</b><br>26 obese of 42 ± 12<br>years<br><br><b>Vienna, Austria</b> | <b>Obese:</b><br>~46 ± 6    |                                                                                                                                                                                                                                     |                                                                                                                                                                                                                                                                                                                                                                                                     | <b><i>IL-6</i> (-0.83)</b><br><b><i>IL-10</i> (-0.63)</b><br><b><i>FGF1</i> (-0.58)</b><br><i>CCL3</i> (-0.50)<br><b><i>IL1B</i> (-0.50)</b><br><b><i>CASP3</i> (-0.34)</b><br><i>CD68</i> (-0.30)<br><i>HLA-DR</i> (-0.25)<br><i>CD144</i> (-0.25)<br><i>VEGFC</i> (-0.25)<br><b><i>PPARG</i> (-0.12)</b><br><b><i>TNFα</i> (-0.08)</b> |
|                                                                                                                                                 |                                                                             |                             | Note: Approximate values<br>from graphics in the article                                                                                                                                                                            | Note: Approximate values<br>from graphics in the article                                                                                                                                                                                                                                                                                                                                            | (Jürets et al.,<br>2017)                                                                                                                                                                                                                                                                                                                 |

Genes, method, N, mean age, BMI (body mass index), reported or calculated fold change, upregulated or downregulated genes, reference. Highlighted genes are those found in the intersection of comparisons between post-RYGB vs obese and lean vs obese. Bold font appoints significance.

# Post-RYGB vs obese

| Method                                                                                                                                                                                                                                                                                                                                                                     | Characteristics of the groups             | Bariatric surgery data | BMI data (kg/m <sup>2</sup> ) | Gene expression fold change (Post RYGB vs Obese) |         |                         |                             | Reference         |                       |                                 |                                              |  |                                   |                                           |             |                                   |                                           |               |                                     |                                       |                                     |                                       |                        |                        |  |  |                         |                           |  |  |
|----------------------------------------------------------------------------------------------------------------------------------------------------------------------------------------------------------------------------------------------------------------------------------------------------------------------------------------------------------------------------|-------------------------------------------|------------------------|-------------------------------|--------------------------------------------------|---------|-------------------------|-----------------------------|-------------------|-----------------------|---------------------------------|----------------------------------------------|--|-----------------------------------|-------------------------------------------|-------------|-----------------------------------|-------------------------------------------|---------------|-------------------------------------|---------------------------------------|-------------------------------------|---------------------------------------|------------------------|------------------------|--|--|-------------------------|---------------------------|--|--|
| <p><b>Microarrays</b></p> <p>Affymetrix GeneChip Human Gene 2.0 ST Array</p> <p>13,885 transcripts post-RYGB vs obese</p> <p><b>qPCR</b></p> <p>Candidate genes involved in:</p> <p>(a) Cell cycle</p> <p>(b) Development</p> <p>(c) Lipid metabolism</p> <p>(d) Inflammatory response</p> <p>In addition, the genes that were most regulated post-RYGB were selected.</p> | Patients data/ <b>Recruitment country</b> | RYGB                   | ~2 years                      | ~43 ± 5                                          | ~29 ± 6 | ~14 kg/m <sup>2</sup> ; | <b>Microarrays and qPCR</b> | Obese:<br>~43 ± 5 | Post-RYGB:<br>~29 ± 6 | ΔBMI<br>~14 kg/m <sup>2</sup> ; | Calculated fold change [(Post-RYGB/Obese)-1] |  |                                   |                                           |             |                                   |                                           |               |                                     |                                       |                                     |                                       |                        |                        |  |  |                         |                           |  |  |
|                                                                                                                                                                                                                                                                                                                                                                            | <b>Microarrays</b>                        |                        |                               |                                                  |         |                         |                             |                   |                       |                                 |                                              |  | Obese:<br>16 obese of 48±10 years | Post-RYGB:<br>16 patients of 51 ± 9 years | <b>qPCR</b> | Obese:<br>25 obese of 48±10 years | Post-RYGB:<br>25 patients of 51 ± 9 years | Girona, Spain | Upregulated expression post-RYGB(+) | Downregulated expression post-RYGB(-) | Upregulated expression post-RYGB(+) | Downregulated expression post-RYGB(-) |                        |                        |  |  |                         |                           |  |  |
|                                                                                                                                                                                                                                                                                                                                                                            |                                           |                        |                               |                                                  |         |                         |                             |                   |                       |                                 |                                              |  |                                   |                                           |             |                                   |                                           |               |                                     |                                       |                                     |                                       | Logarithmic conversion | Logarithmic conversion |  |  |                         |                           |  |  |
|                                                                                                                                                                                                                                                                                                                                                                            |                                           |                        |                               |                                                  |         |                         |                             |                   |                       |                                 |                                              |  |                                   |                                           |             |                                   |                                           |               |                                     |                                       |                                     |                                       |                        |                        |  |  | 2,432 upregulated genes | 2,586 downregulated genes |  |  |
|                                                                                                                                                                                                                                                                                                                                                                            |                                           |                        |                               |                                                  |         |                         |                             |                   |                       |                                 |                                              |  |                                   |                                           |             |                                   |                                           |               |                                     |                                       |                                     |                                       |                        |                        |  |  |                         |                           |  |  |
| SLC27A2 (3.79)                                                                                                                                                                                                                                                                                                                                                             | FOS (-0.86)                               | ELOVL6 (12.54)         | IL-6 (-0.96)                  |                                                  |         |                         |                             |                   |                       |                                 |                                              |  |                                   |                                           |             |                                   |                                           |               |                                     |                                       |                                     |                                       |                        |                        |  |  |                         |                           |  |  |
| ELOVL6 (1.91)                                                                                                                                                                                                                                                                                                                                                              | EGFL6 (-0.79)                             | FOS (-0.96)            | FOS (-0.96)                   |                                                  |         |                         |                             |                   |                       |                                 |                                              |  |                                   |                                           |             |                                   |                                           |               |                                     |                                       |                                     |                                       |                        |                        |  |  |                         |                           |  |  |
| FASN (1.87)                                                                                                                                                                                                                                                                                                                                                                | AQP9 (-0.78)                              | RGS1 (-0.94)           | RGS1 (-0.94)                  |                                                  |         |                         |                             |                   |                       |                                 |                                              |  |                                   |                                           |             |                                   |                                           |               |                                     |                                       |                                     |                                       |                        |                        |  |  |                         |                           |  |  |
| STOX1 (1.77)                                                                                                                                                                                                                                                                                                                                                               | PRG4 (-0.78)                              | AQP9 (-0.90)           | AQP9 (-0.90)                  |                                                  |         |                         |                             |                   |                       |                                 |                                              |  |                                   |                                           |             |                                   |                                           |               |                                     |                                       |                                     |                                       |                        |                        |  |  |                         |                           |  |  |
| GYS2 (1.71)                                                                                                                                                                                                                                                                                                                                                                | FOSB (-0.73)                              | SPP1 (-0.87)           | SPP1 (-0.87)                  |                                                  |         |                         |                             |                   |                       |                                 |                                              |  |                                   |                                           |             |                                   |                                           |               |                                     |                                       |                                     |                                       |                        |                        |  |  |                         |                           |  |  |
| MOGAT1 (1.58)                                                                                                                                                                                                                                                                                                                                                              | MT1A (-0.71)                              | EGR1 (-0.84)           | EGR1 (-0.84)                  |                                                  |         |                         |                             |                   |                       |                                 |                                              |  |                                   |                                           |             |                                   |                                           |               |                                     |                                       |                                     |                                       |                        |                        |  |  |                         |                           |  |  |
| SNORA71B (1.58)                                                                                                                                                                                                                                                                                                                                                            | DUSP1 (-0.7)                              | DUSP1 (-0.83)          | DUSP1 (-0.83)                 |                                                  |         |                         |                             |                   |                       |                                 |                                              |  |                                   |                                           |             |                                   |                                           |               |                                     |                                       |                                     |                                       |                        |                        |  |  |                         |                           |  |  |
| LGALS12 (1.46)                                                                                                                                                                                                                                                                                                                                                             | RGS1 (-0.69)                              | PRG4 (-0.81)           | PRG4 (-0.81)                  |                                                  |         |                         |                             |                   |                       |                                 |                                              |  |                                   |                                           |             |                                   |                                           |               |                                     |                                       |                                     |                                       |                        |                        |  |  |                         |                           |  |  |
| C6 (1.45)                                                                                                                                                                                                                                                                                                                                                                  | EGR1 (-0.68)                              | EGFL6 (-0.8)           | EGFL6 (-0.8)                  |                                                  |         |                         |                             |                   |                       |                                 |                                              |  |                                   |                                           |             |                                   |                                           |               |                                     |                                       |                                     |                                       |                        |                        |  |  |                         |                           |  |  |
| TF (1.45)                                                                                                                                                                                                                                                                                                                                                                  | SPP1 (-0.67)                              | TNFα (-0.75)           | TNFα (-0.75)                  |                                                  |         |                         |                             |                   |                       |                                 |                                              |  |                                   |                                           |             |                                   |                                           |               |                                     |                                       |                                     |                                       |                        |                        |  |  |                         |                           |  |  |
| PKP2 (1.43)                                                                                                                                                                                                                                                                                                                                                                | LYZ (-0.67)                               | LYZ (-0.68)            | LYZ (-0.68)                   |                                                  |         |                         |                             |                   |                       |                                 |                                              |  |                                   |                                           |             |                                   |                                           |               |                                     |                                       |                                     |                                       |                        |                        |  |  |                         |                           |  |  |
| OLFM2 (1.35)                                                                                                                                                                                                                                                                                                                                                               | C5AR1 (-0.66)                             | IQ6GAP2 (-0.51)        | IQ6GAP2 (-0.51)               |                                                  |         |                         |                             |                   |                       |                                 |                                              |  |                                   |                                           |             |                                   |                                           |               |                                     |                                       |                                     |                                       |                        |                        |  |  |                         |                           |  |  |
| ACLY (1.35)                                                                                                                                                                                                                                                                                                                                                                | IFI30 (-0.66)                             | KPNA2 (-0.48)          | KPNA2 (-0.48)                 |                                                  |         |                         |                             |                   |                       |                                 |                                              |  |                                   |                                           |             |                                   |                                           |               |                                     |                                       |                                     |                                       |                        |                        |  |  |                         |                           |  |  |
|                                                                                                                                                                                                                                                                                                                                                                            | HSD11B1 (-0.65)                           |                        |                               |                                                  |         |                         |                             |                   |                       |                                 |                                              |  |                                   |                                           |             |                                   |                                           |               |                                     |                                       |                                     |                                       |                        |                        |  |  |                         |                           |  |  |
|                                                                                                                                                                                                                                                                                                                                                                            | CD69 (-0.63)                              |                        |                               |                                                  |         |                         |                             |                   |                       |                                 |                                              |  |                                   |                                           |             |                                   |                                           |               |                                     |                                       |                                     |                                       |                        |                        |  |  |                         |                           |  |  |
|                                                                                                                                                                                                                                                                                                                                                                            | IL8 (-0.63)                               |                        |                               |                                                  |         |                         |                             |                   |                       |                                 |                                              |  |                                   |                                           |             |                                   |                                           |               |                                     |                                       |                                     |                                       |                        |                        |  |  |                         |                           |  |  |
|                                                                                                                                                                                                                                                                                                                                                                            | CLEC7A (-0.63)                            |                        |                               |                                                  |         |                         |                             |                   |                       |                                 |                                              |  |                                   |                                           |             |                                   |                                           |               |                                     |                                       |                                     |                                       |                        |                        |  |  |                         |                           |  |  |
|                                                                                                                                                                                                                                                                                                                                                                            | JUNB (-0.62)                              |                        |                               |                                                  |         |                         |                             |                   |                       |                                 |                                              |  |                                   |                                           |             |                                   |                                           |               |                                     |                                       |                                     |                                       |                        |                        |  |  |                         |                           |  |  |
|                                                                                                                                                                                                                                                                                                                                                                            | RANBP3L (-0.62)                           |                        |                               |                                                  |         |                         |                             |                   |                       |                                 |                                              |  |                                   |                                           |             |                                   |                                           |               |                                     |                                       |                                     |                                       |                        |                        |  |  |                         |                           |  |  |
|                                                                                                                                                                                                                                                                                                                                                                            | ZFP36 (-0.62)                             |                        |                               |                                                  |         |                         |                             |                   |                       |                                 |                                              |  |                                   |                                           |             |                                   |                                           |               |                                     |                                       |                                     |                                       |                        |                        |  |  |                         |                           |  |  |
|                                                                                                                                                                                                                                                                                                                                                                            | THBS1 (-0.62)                             |                        |                               |                                                  |         |                         |                             |                   |                       |                                 |                                              |  |                                   |                                           |             |                                   |                                           |               |                                     |                                       |                                     |                                       |                        |                        |  |  |                         |                           |  |  |
|                                                                                                                                                                                                                                                                                                                                                                            | PLA2G7 (-0.62)                            |                        |                               |                                                  |         |                         |                             |                   |                       |                                 |                                              |  |                                   |                                           |             |                                   |                                           |               |                                     |                                       |                                     |                                       |                        |                        |  |  |                         |                           |  |  |
|                                                                                                                                                                                                                                                                                                                                                                            | IGSF6 (-0.61)                             |                        |                               |                                                  |         |                         |                             |                   |                       |                                 |                                              |  |                                   |                                           |             |                                   |                                           |               |                                     |                                       |                                     |                                       |                        |                        |  |  |                         |                           |  |  |
|                                                                                                                                                                                                                                                                                                                                                                            | C3AR1 (-0.59)                             |                        |                               |                                                  |         |                         |                             |                   |                       |                                 |                                              |  |                                   |                                           |             |                                   |                                           |               |                                     |                                       |                                     |                                       |                        |                        |  |  |                         |                           |  |  |
|                                                                                                                                                                                                                                                                                                                                                                            | CHI3L1 (-0.59)                            |                        |                               |                                                  |         |                         |                             |                   |                       |                                 |                                              |  |                                   |                                           |             |                                   |                                           |               |                                     |                                       |                                     |                                       |                        |                        |  |  |                         |                           |  |  |
|                                                                                                                                                                                                                                                                                                                                                                            | MMP9 (-0.59)                              |                        |                               |                                                  |         |                         |                             |                   |                       |                                 |                                              |  |                                   |                                           |             |                                   |                                           |               |                                     |                                       |                                     |                                       |                        |                        |  |  |                         |                           |  |  |
|                                                                                                                                                                                                                                                                                                                                                                            | NQO1 (-0.59)                              |                        |                               |                                                  |         |                         |                             |                   |                       |                                 |                                              |  |                                   |                                           |             |                                   |                                           |               |                                     |                                       |                                     |                                       |                        |                        |  |  |                         |                           |  |  |
|                                                                                                                                                                                                                                                                                                                                                                            | MS4A6E (-0.59)                            |                        |                               |                                                  |         |                         |                             |                   |                       |                                 |                                              |  |                                   |                                           |             |                                   |                                           |               |                                     |                                       |                                     |                                       |                        |                        |  |  |                         |                           |  |  |
|                                                                                                                                                                                                                                                                                                                                                                            | CXorf21 (-0.59)                           |                        |                               |                                                  |         |                         |                             |                   |                       |                                 |                                              |  |                                   |                                           |             |                                   |                                           |               |                                     |                                       |                                     |                                       |                        |                        |  |  |                         |                           |  |  |
|                                                                                                                                                                                                                                                                                                                                                                            | MS4A7 (-0.58)                             |                        |                               |                                                  |         |                         |                             |                   |                       |                                 |                                              |  |                                   |                                           |             |                                   |                                           |               |                                     |                                       |                                     |                                       |                        |                        |  |  |                         |                           |  |  |
|                                                                                                                                                                                                                                                                                                                                                                            | NPR3 (-0.58)                              |                        |                               |                                                  |         |                         |                             |                   |                       |                                 |                                              |  |                                   |                                           |             |                                   |                                           |               |                                     |                                       |                                     |                                       |                        |                        |  |  |                         |                           |  |  |
|                                                                                                                                                                                                                                                                                                                                                                            | MS4A14 (-0.58)                            |                        |                               |                                                  |         |                         |                             |                   |                       |                                 |                                              |  |                                   |                                           |             |                                   |                                           |               |                                     |                                       |                                     |                                       |                        |                        |  |  |                         |                           |  |  |
|                                                                                                                                                                                                                                                                                                                                                                            | CCL8 (-0.58)                              |                        |                               |                                                  |         |                         |                             |                   |                       |                                 |                                              |  |                                   |                                           |             |                                   |                                           |               |                                     |                                       |                                     |                                       |                        |                        |  |  |                         |                           |  |  |
|                                                                                                                                                                                                                                                                                                                                                                            | P2RY13 (-0.58)                            |                        |                               |                                                  |         |                         |                             |                   |                       |                                 |                                              |  |                                   |                                           |             |                                   |                                           |               |                                     |                                       |                                     |                                       |                        |                        |  |  |                         |                           |  |  |
|                                                                                                                                                                                                                                                                                                                                                                            | ITGAX (-0.58)                             |                        |                               |                                                  |         |                         |                             |                   |                       |                                 |                                              |  |                                   |                                           |             |                                   |                                           |               |                                     |                                       |                                     |                                       |                        |                        |  |  |                         |                           |  |  |
|                                                                                                                                                                                                                                                                                                                                                                            | JUN (-0.58)                               |                        |                               |                                                  |         |                         |                             |                   |                       |                                 |                                              |  |                                   |                                           |             |                                   |                                           |               |                                     |                                       |                                     |                                       |                        |                        |  |  |                         |                           |  |  |
|                                                                                                                                                                                                                                                                                                                                                                            | MS4A4E (-0.57)                            |                        |                               |                                                  |         |                         |                             |                   |                       |                                 |                                              |  |                                   |                                           |             |                                   |                                           |               |                                     |                                       |                                     |                                       |                        |                        |  |  |                         |                           |  |  |
|                                                                                                                                                                                                                                                                                                                                                                            | ADAM12 (-0.57)                            |                        |                               |                                                  |         |                         |                             |                   |                       |                                 |                                              |  |                                   |                                           |             |                                   |                                           |               |                                     |                                       |                                     |                                       |                        |                        |  |  |                         |                           |  |  |
|                                                                                                                                                                                                                                                                                                                                                                            | MNDA (-0.57)                              |                        |                               |                                                  |         |                         |                             |                   |                       |                                 |                                              |  |                                   |                                           |             |                                   |                                           |               |                                     |                                       |                                     |                                       |                        |                        |  |  |                         |                           |  |  |
|                                                                                                                                                                                                                                                                                                                                                                            | CES1 (-0.56)                              |                        |                               |                                                  |         |                         |                             |                   |                       |                                 |                                              |  |                                   |                                           |             |                                   |                                           |               |                                     |                                       |                                     |                                       |                        |                        |  |  |                         |                           |  |  |
|                                                                                                                                                                                                                                                                                                                                                                            |                                           |                        |                               |                                                  |         |                         |                             |                   |                       |                                 |                                              |  |                                   |                                           |             |                                   |                                           |               |                                     |                                       |                                     |                                       |                        |                        |  |  |                         |                           |  |  |
|                                                                                                                                                                                                                                                                                                                                                                            |                                           |                        |                               |                                                  |         |                         |                             |                   |                       |                                 |                                              |  |                                   |                                           |             |                                   |                                           |               |                                     |                                       |                                     |                                       |                        |                        |  |  |                         |                           |  |  |
|                                                                                                                                                                                                                                                                                                                                                                            |                                           |                        |                               |                                                  |         |                         |                             |                   |                       |                                 |                                              |  |                                   |                                           |             |                                   |                                           |               |                                     |                                       |                                     |                                       |                        |                        |  |  |                         |                           |  |  |
|                                                                                                                                                                                                                                                                                                                                                                            |                                           |                        |                               |                                                  |         |                         |                             |                   |                       |                                 |                                              |  |                                   |                                           |             |                                   |                                           |               |                                     |                                       |                                     |                                       |                        |                        |  |  |                         |                           |  |  |
|                                                                                                                                                                                                                                                                                                                                                                            |                                           |                        |                               |                                                  |         |                         |                             |                   |                       |                                 |                                              |  |                                   |                                           |             |                                   |                                           |               |                                     |                                       |                                     |                                       |                        |                        |  |  |                         |                           |  |  |
|                                                                                                                                                                                                                                                                                                                                                                            |                                           |                        |                               |                                                  |         |                         |                             |                   |                       |                                 |                                              |  |                                   |                                           |             |                                   |                                           |               |                                     |                                       |                                     |                                       |                        |                        |  |  |                         |                           |  |  |
|                                                                                                                                                                                                                                                                                                                                                                            |                                           |                        |                               |                                                  |         |                         |                             |                   |                       |                                 |                                              |  |                                   |                                           |             |                                   |                                           |               |                                     |                                       |                                     |                                       |                        |                        |  |  |                         |                           |  |  |
|                                                                                                                                                                                                                                                                                                                                                                            |                                           |                        |                               |                                                  |         |                         |                             |                   |                       |                                 |                                              |  |                                   |                                           |             |                                   |                                           |               |                                     |                                       |                                     |                                       |                        |                        |  |  |                         |                           |  |  |
|                                                                                                                                                                                                                                                                                                                                                                            |                                           |                        |                               |                                                  |         |                         |                             |                   |                       |                                 |                                              |  |                                   |                                           |             |                                   |                                           |               |                                     |                                       |                                     |                                       |                        |                        |  |  |                         |                           |  |  |
|                                                                                                                                                                                                                                                                                                                                                                            |                                           |                        |                               |                                                  |         |                         |                             |                   |                       |                                 |                                              |  |                                   |                                           |             |                                   |                                           |               |                                     |                                       |                                     |                                       |                        |                        |  |  |                         |                           |  |  |
|                                                                                                                                                                                                                                                                                                                                                                            |                                           |                        |                               |                                                  |         |                         |                             |                   |                       |                                 |                                              |  |                                   |                                           |             |                                   |                                           |               |                                     |                                       |                                     |                                       |                        |                        |  |  |                         |                           |  |  |
|                                                                                                                                                                                                                                                                                                                                                                            |                                           |                        |                               |                                                  |         |                         |                             |                   |                       |                                 |                                              |  |                                   |                                           |             |                                   |                                           |               |                                     |                                       |                                     |                                       |                        |                        |  |  |                         |                           |  |  |
|                                                                                                                                                                                                                                                                                                                                                                            |                                           |                        |                               |                                                  |         |                         |                             |                   |                       |                                 |                                              |  |                                   |                                           |             |                                   |                                           |               |                                     |                                       |                                     |                                       |                        |                        |  |  |                         |                           |  |  |
|                                                                                                                                                                                                                                                                                                                                                                            |                                           |                        |                               |                                                  |         |                         |                             |                   |                       |                                 |                                              |  |                                   |                                           |             |                                   |                                           |               |                                     |                                       |                                     |                                       |                        |                        |  |  |                         |                           |  |  |
|                                                                                                                                                                                                                                                                                                                                                                            |                                           |                        |                               |                                                  |         |                         |                             |                   |                       |                                 |                                              |  |                                   |                                           |             |                                   |                                           |               |                                     |                                       |                                     |                                       |                        |                        |  |  |                         |                           |  |  |
|                                                                                                                                                                                                                                                                                                                                                                            |                                           |                        |                               |                                                  |         |                         |                             |                   |                       |                                 |                                              |  |                                   |                                           |             |                                   |                                           |               |                                     |                                       |                                     |                                       |                        |                        |  |  |                         |                           |  |  |
|                                                                                                                                                                                                                                                                                                                                                                            |                                           |                        |                               |                                                  |         |                         |                             |                   |                       |                                 |                                              |  |                                   |                                           |             |                                   |                                           |               |                                     |                                       |                                     |                                       |                        |                        |  |  |                         |                           |  |  |
|                                                                                                                                                                                                                                                                                                                                                                            |                                           |                        |                               |                                                  |         |                         |                             |                   |                       |                                 |                                              |  |                                   |                                           |             |                                   |                                           |               |                                     |                                       |                                     |                                       |                        |                        |  |  |                         |                           |  |  |
|                                                                                                                                                                                                                                                                                                                                                                            |                                           |                        |                               |                                                  |         |                         |                             |                   |                       |                                 |                                              |  |                                   |                                           |             |                                   |                                           |               |                                     |                                       |                                     |                                       |                        |                        |  |  |                         |                           |  |  |
|                                                                                                                                                                                                                                                                                                                                                                            |                                           |                        |                               |                                                  |         |                         |                             |                   |                       |                                 |                                              |  |                                   |                                           |             |                                   |                                           |               |                                     |                                       |                                     |                                       |                        |                        |  |  |                         |                           |  |  |
|                                                                                                                                                                                                                                                                                                                                                                            |                                           |                        |                               |                                                  |         |                         |                             |                   |                       |                                 |                                              |  |                                   |                                           |             |                                   |                                           |               |                                     |                                       |                                     |                                       |                        |                        |  |  |                         |                           |  |  |
|                                                                                                                                                                                                                                                                                                                                                                            |                                           |                        |                               |                                                  |         |                         |                             |                   |                       |                                 |                                              |  |                                   |                                           |             |                                   |                                           |               |                                     |                                       |                                     |                                       |                        |                        |  |  |                         |                           |  |  |
|                                                                                                                                                                                                                                                                                                                                                                            |                                           |                        |                               |                                                  |         |                         |                             |                   |                       |                                 |                                              |  |                                   |                                           |             |                                   |                                           |               |                                     |                                       |                                     |                                       |                        |                        |  |  |                         |                           |  |  |
|                                                                                                                                                                                                                                                                                                                                                                            |                                           |                        |                               |                                                  |         |                         |                             |                   |                       |                                 |                                              |  |                                   |                                           |             |                                   |                                           |               |                                     |                                       |                                     |                                       |                        |                        |  |  |                         |                           |  |  |
|                                                                                                                                                                                                                                                                                                                                                                            |                                           |                        |                               |                                                  |         |                         |                             |                   |                       |                                 |                                              |  |                                   |                                           |             |                                   |                                           |               |                                     |                                       |                                     |                                       |                        |                        |  |  |                         |                           |  |  |
|                                                                                                                                                                                                                                                                                                                                                                            |                                           |                        |                               |                                                  |         |                         |                             |                   |                       |                                 |                                              |  |                                   |                                           |             |                                   |                                           |               |                                     |                                       |                                     |                                       |                        |                        |  |  |                         |                           |  |  |
|                                                                                                                                                                                                                                                                                                                                                                            |                                           |                        |                               |                                                  |         |                         |                             |                   |                       |                                 |                                              |  |                                   |                                           |             |                                   |                                           |               |                                     |                                       |                                     |                                       |                        |                        |  |  |                         |                           |  |  |
|                                                                                                                                                                                                                                                                                                                                                                            |                                           |                        |                               |                                                  |         |                         |                             |                   |                       |                                 |                                              |  |                                   |                                           |             |                                   |                                           |               |                                     |                                       |                                     |                                       |                        |                        |  |  |                         |                           |  |  |
|                                                                                                                                                                                                                                                                                                                                                                            |                                           |                        |                               |                                                  |         |                         |                             |                   |                       |                                 |                                              |  |                                   |                                           |             |                                   |                                           |               |                                     |                                       |                                     |                                       |                        |                        |  |  |                         |                           |  |  |
|                                                                                                                                                                                                                                                                                                                                                                            |                                           |                        |                               |                                                  |         |                         |                             |                   |                       |                                 |                                              |  |                                   |                                           |             |                                   |                                           |               |                                     |                                       |                                     |                                       |                        |                        |  |  |                         |                           |  |  |
|                                                                                                                                                                                                                                                                                                                                                                            |                                           |                        |                               |                                                  |         |                         |                             |                   |                       |                                 |                                              |  |                                   |                                           |             |                                   |                                           |               |                                     |                                       |                                     |                                       |                        |                        |  |  |                         |                           |  |  |
|                                                                                                                                                                                                                                                                                                                                                                            |                                           |                        |                               |                                                  |         |                         |                             |                   |                       |                                 |                                              |  |                                   |                                           |             |                                   |                                           |               |                                     |                                       |                                     |                                       |                        |                        |  |  |                         |                           |  |  |
|                                                                                                                                                                                                                                                                                                                                                                            |                                           |                        |                               |                                                  |         |                         |                             |                   |                       |                                 |                                              |  |                                   |                                           |             |                                   |                                           |               |                                     |                                       |                                     |                                       |                        |                        |  |  |                         |                           |  |  |
|                                                                                                                                                                                                                                                                                                                                                                            |                                           |                        |                               |                                                  |         |                         |                             |                   |                       |                                 |                                              |  |                                   |                                           |             |                                   |                                           |               |                                     |                                       |                                     |                                       |                        |                        |  |  |                         |                           |  |  |
|                                                                                                                                                                                                                                                                                                                                                                            |                                           |                        |                               |                                                  |         |                         |                             |                   |                       |                                 |                                              |  |                                   |                                           |             |                                   |                                           |               |                                     |                                       |                                     |                                       |                        |                        |  |  |                         |                           |  |  |
|                                                                                                                                                                                                                                                                                                                                                                            |                                           |                        |                               |                                                  |         |                         |                             |                   |                       |                                 |                                              |  |                                   |                                           |             |                                   |                                           |               |                                     |                                       |                                     |                                       |                        |                        |  |  |                         |                           |  |  |
|                                                                                                                                                                                                                                                                                                                                                                            |                                           |                        |                               |                                                  |         |                         |                             |                   |                       |                                 |                                              |  |                                   |                                           |             |                                   |                                           |               |                                     |                                       |                                     |                                       |                        |                        |  |  |                         |                           |  |  |
|                                                                                                                                                                                                                                                                                                                                                                            |                                           |                        |                               |                                                  |         |                         |                             |                   |                       |                                 |                                              |  |                                   |                                           |             |                                   |                                           |               |                                     |                                       |                                     |                                       |                        |                        |  |  |                         |                           |  |  |
|                                                                                                                                                                                                                                                                                                                                                                            |                                           |                        |                               |                                                  |         |                         |                             |                   |                       |                                 |                                              |  |                                   |                                           |             |                                   |                                           |               |                                     |                                       |                                     |                                       |                        |                        |  |  |                         |                           |  |  |
|                                                                                                                                                                                                                                                                                                                                                                            |                                           |                        |                               |                                                  |         |                         |                             |                   |                       |                                 |                                              |  |                                   |                                           |             |                                   |                                           |               |                                     |                                       |                                     |                                       |                        |                        |  |  |                         |                           |  |  |
|                                                                                                                                                                                                                                                                                                                                                                            |                                           |                        |                               |                                                  |         |                         |                             |                   |                       |                                 |                                              |  |                                   |                                           |             |                                   |                                           |               |                                     |                                       |                                     |                                       |                        |                        |  |  |                         |                           |  |  |
|                                                                                                                                                                                                                                                                                                                                                                            |                                           |                        |                               |                                                  |         |                         |                             |                   |                       |                                 |                                              |  |                                   |                                           |             |                                   |                                           |               |                                     |                                       |                                     |                                       |                        |                        |  |  |                         |                           |  |  |
|                                                                                                                                                                                                                                                                                                                                                                            |                                           |                        |                               |                                                  |         |                         |                             |                   |                       |                                 |                                              |  |                                   |                                           |             |                                   |                                           |               |                                     |                                       |                                     |                                       |                        |                        |  |  |                         |                           |  |  |
|                                                                                                                                                                                                                                                                                                                                                                            |                                           |                        |                               |                                                  |         |                         |                             |                   |                       |                                 |                                              |  |                                   |                                           |             |                                   |                                           |               |                                     |                                       |                                     |                                       |                        |                        |  |  |                         |                           |  |  |
|                                                                                                                                                                                                                                                                                                                                                                            |                                           |                        |                               |                                                  |         |                         |                             |                   |                       |                                 |                                              |  |                                   |                                           |             |                                   |                                           |               |                                     |                                       |                                     |                                       |                        |                        |  |  |                         |                           |  |  |
|                                                                                                                                                                                                                                                                                                                                                                            |                                           |                        |                               |                                                  |         |                         |                             |                   |                       |                                 |                                              |  |                                   |                                           |             |                                   |                                           |               |                                     |                                       |                                     |                                       |                        |                        |  |  |                         |                           |  |  |
|                                                                                                                                                                                                                                                                                                                                                                            |                                           |                        |                               |                                                  |         |                         |                             |                   |                       |                                 |                                              |  |                                   |                                           |             |                                   |                                           |               |                                     |                                       |                                     |                                       |                        |                        |  |  |                         |                           |  |  |
|                                                                                                                                                                                                                                                                                                                                                                            |                                           |                        |                               |                                                  |         |                         |                             |                   |                       |                                 |                                              |  |                                   |                                           |             |                                   |                                           |               |                                     |                                       |                                     |                                       |                        |                        |  |  |                         |                           |  |  |
|                                                                                                                                                                                                                                                                                                                                                                            |                                           |                        |                               |                                                  |         |                         |                             |                   |                       |                                 |                                              |  |                                   |                                           |             |                                   |                                           |               |                                     |                                       |                                     |                                       |                        |                        |  |  |                         |                           |  |  |
|                                                                                                                                                                                                                                                                                                                                                                            |                                           |                        |                               |                                                  |         |                         |                             |                   |                       |                                 |                                              |  |                                   |                                           |             |                                   |                                           |               |                                     |                                       |                                     |                                       |                        |                        |  |  |                         |                           |  |  |
|                                                                                                                                                                                                                                                                                                                                                                            |                                           |                        |                               |                                                  |         |                         |                             |                   |                       |                                 |                                              |  |                                   |                                           |             |                                   |                                           |               |                                     |                                       |                                     |                                       |                        |                        |  |  |                         |                           |  |  |
|                                                                                                                                                                                                                                                                                                                                                                            |                                           |                        |                               |                                                  |         |                         |                             |                   |                       |                                 |                                              |  |                                   |                                           |             |                                   |                                           |               |                                     |                                       |                                     |                                       |                        |                        |  |  |                         |                           |  |  |
|                                                                                                                                                                                                                                                                                                                                                                            |                                           |                        |                               |                                                  |         |                         |                             |                   |                       |                                 |                                              |  |                                   |                                           |             |                                   |                                           |               |                                     |                                       |                                     |                                       |                        |                        |  |  |                         |                           |  |  |
|                                                                                                                                                                                                                                                                                                                                                                            |                                           |                        |                               |                                                  |         |                         |                             |                   |                       |                                 |                                              |  |                                   |                                           |             |                                   |                                           |               |                                     |                                       |                                     |                                       |                        |                        |  |  |                         |                           |  |  |
|                                                                                                                                                                                                                                                                                                                                                                            |                                           |                        |                               |                                                  |         |                         |                             |                   |                       |                                 |                                              |  |                                   |                                           |             |                                   |                                           |               |                                     |                                       |                                     |                                       |                        |                        |  |  |                         |                           |  |  |
|                                                                                                                                                                                                                                                                                                                                                                            |                                           |                        |                               |                                                  |         |                         |                             |                   |                       |                                 |                                              |  |                                   |                                           |             |                                   |                                           |               |                                     |                                       |                                     |                                       |                        |                        |  |  |                         |                           |  |  |
|                                                                                                                                                                                                                                                                                                                                                                            |                                           |                        |                               |                                                  |         |                         |                             |                   |                       |                                 |                                              |  |                                   |                                           |             |                                   |                                           |               |                                     |                                       |                                     |                                       |                        |                        |  |  |                         |                           |  |  |
|                                                                                                                                                                                                                                                                                                                                                                            |                                           |                        |                               |                                                  |         |                         |                             |                   |                       |                                 |                                              |  |                                   |                                           |             |                                   |                                           |               |                                     |                                       |                                     |                                       |                        |                        |  |  |                         |                           |  |  |
|                                                                                                                                                                                                                                                                                                                                                                            |                                           |                        |                               |                                                  |         |                         |                             |                   |                       |                                 |                                              |  |                                   |                                           |             |                                   |                                           |               |                                     |                                       |                                     |                                       |                        |                        |  |  |                         |                           |  |  |
|                                                                                                                                                                                                                                                                                                                                                                            |                                           |                        |                               |                                                  |         |                         |                             |                   |                       |                                 |                                              |  |                                   |                                           |             |                                   |                                           |               |                                     |                                       |                                     |                                       |                        |                        |  |  |                         |                           |  |  |
|                                                                                                                                                                                                                                                                                                                                                                            |                                           |                        |                               |                                                  |         |                         |                             |                   |                       |                                 |                                              |  |                                   |                                           |             |                                   |                                           |               |                                     |                                       |                                     |                                       |                        |                        |  |  |                         |                           |  |  |
|                                                                                                                                                                                                                                                                                                                                                                            |                                           |                        |                               |                                                  |         |                         |                             |                   |                       |                                 |                                              |  |                                   |                                           |             |                                   |                                           |               |                                     |                                       |                                     |                                       |                        |                        |  |  |                         |                           |  |  |
|                                                                                                                                                                                                                                                                                                                                                                            |                                           |                        |                               |                                                  |         |                         |                             |                   |                       |                                 |                                              |  |                                   |                                           |             |                                   |                                           |               |                                     |                                       |                                     |                                       |                        |                        |  |  |                         |                           |  |  |
|                                                                                                                                                                                                                                                                                                                                                                            |                                           |                        |                               |                                                  |         |                         |                             |                   |                       |                                 |                                              |  |                                   |                                           |             |                                   |                                           |               |                                     |                                       |                                     |                                       |                        |                        |  |  |                         |                           |  |  |
|                                                                                                                                                                                                                                                                                                                                                                            |                                           |                        |                               |                                                  |         |                         |                             |                   |                       |                                 |                                              |  |                                   |                                           |             |                                   |                                           |               |                                     |                                       |                                     |                                       |                        |                        |  |  |                         |                           |  |  |
|                                                                                                                                                                                                                                                                                                                                                                            |                                           |                        |                               |                                                  |         |                         |                             |                   |                       |                                 |                                              |  |                                   |                                           |             |                                   |                                           |               |                                     |                                       |                                     |                                       |                        |                        |  |  |                         |                           |  |  |
|                                                                                                                                                                                                                                                                                                                                                                            |                                           |                        |                               |                                                  |         |                         |                             |                   |                       |                                 |                                              |  |                                   |                                           |             |                                   |                                           |               |                                     |                                       |                                     |                                       |                        |                        |  |  |                         |                           |  |  |
|                                                                                                                                                                                                                                                                                                                                                                            |                                           |                        |                               |                                                  |         |                         |                             |                   |                       |                                 |                                              |  |                                   |                                           |             |                                   |                                           |               |                                     |                                       |                                     |                                       |                        |                        |  |  |                         |                           |  |  |
|                                                                                                                                                                                                                                                                                                                                                                            |                                           |                        |                               |                                                  |         |                         |                             |                   |                       |                                 |                                              |  |                                   |                                           |             |                                   |                                           |               |                                     |                                       |                                     |                                       |                        |                        |  |  |                         |                           |  |  |
|                                                                                                                                                                                                                                                                                                                                                                            |                                           |                        |                               |                                                  |         |                         |                             |                   |                       |                                 |                                              |  |                                   |                                           |             |                                   |                                           |               |                                     |                                       |                                     |                                       |                        |                        |  |  |                         |                           |  |  |
|                                                                                                                                                                                                                                                                                                                                                                            |                                           |                        |                               |                                                  |         |                         |                             |                   |                       |                                 |                                              |  |                                   |                                           |             |                                   |                                           |               |                                     |                                       |                                     |                                       |                        |                        |  |  |                         |                           |  |  |
|                                                                                                                                                                                                                                                                                                                                                                            |                                           |                        |                               |                                                  |         |                         |                             |                   |                       |                                 |                                              |  |                                   |                                           |             |                                   |                                           |               |                                     |                                       |                                     |                                       |                        |                        |  |  |                         |                           |  |  |
|                                                                                                                                                                                                                                                                                                                                                                            |                                           |                        |                               |                                                  |         |                         |                             |                   |                       |                                 |                                              |  |                                   |                                           |             |                                   |                                           |               |                                     |                                       |                                     |                                       |                        |                        |  |  |                         |                           |  |  |
|                                                                                                                                                                                                                                                                                                                                                                            |                                           |                        |                               |                                                  |         |                         |                             |                   |                       |                                 |                                              |  |                                   |                                           |             |                                   |                                           |               |                                     |                                       |                                     |                                       |                        |                        |  |  |                         |                           |  |  |
|                                                                                                                                                                                                                                                                                                                                                                            |                                           |                        |                               |                                                  |         |                         |                             |                   |                       |                                 |                                              |  |                                   |                                           |             |                                   |                                           |               |                                     |                                       |                                     |                                       |                        |                        |  |  |                         |                           |  |  |
|                                                                                                                                                                                                                                                                                                                                                                            |                                           |                        |                               |                                                  |         |                         |                             |                   |                       |                                 |                                              |  |                                   |                                           |             |                                   |                                           |               |                                     |                                       |                                     |                                       |                        |                        |  |  |                         |                           |  |  |
|                                                                                                                                                                                                                                                                                                                                                                            |                                           |                        |                               |                                                  |         |                         |                             |                   |                       |                                 |                                              |  |                                   |                                           |             |                                   |                                           |               |                                     |                                       |                                     |                                       |                        |                        |  |  |                         |                           |  |  |
|                                                                                                                                                                                                                                                                                                                                                                            |                                           |                        |                               |                                                  |         |                         |                             |                   |                       |                                 |                                              |  |                                   |                                           |             |                                   |                                           |               |                                     |                                       |                                     |                                       |                        |                        |  |  |                         |                           |  |  |
|                                                                                                                                                                                                                                                                                                                                                                            |                                           |                        |                               |                                                  |         |                         |                             |                   |                       |                                 |                                              |  |                                   |                                           |             |                                   |                                           |               |                                     |                                       |                                     |                                       |                        |                        |  |  |                         |                           |  |  |
|                                                                                                                                                                                                                                                                                                                                                                            |                                           |                        |                               |                                                  |         |                         |                             |                   |                       |                                 |                                              |  |                                   |                                           |             |                                   |                                           |               |                                     |                                       |                                     |                                       |                        |                        |  |  |                         |                           |  |  |
|                                                                                                                                                                                                                                                                                                                                                                            |                                           |                        |                               |                                                  |         |                         |                             |                   |                       |                                 |                                              |  |                                   |                                           |             |                                   |                                           |               |                                     |                                       |                                     |                                       |                        |                        |  |  |                         |                           |  |  |
|                                                                                                                                                                                                                                                                                                                                                                            |                                           |                        |                               |                                                  |         |                         |                             |                   |                       |                                 |                                              |  |                                   |                                           |             |                                   |                                           |               |                                     |                                       |                                     |                                       |                        |                        |  |  |                         |                           |  |  |
|                                                                                                                                                                                                                                                                                                                                                                            |                                           |                        |                               |                                                  |         |                         |                             |                   |                       |                                 |                                              |  |                                   |                                           |             |                                   |                                           |               |                                     |                                       |                                     |                                       |                        |                        |  |  |                         |                           |  |  |
|                                                                                                                                                                                                                                                                                                                                                                            |                                           |                        |                               |                                                  |         |                         |                             |                   |                       |                                 |                                              |  |                                   |                                           |             |                                   |                                           |               |                                     |                                       |                                     |                                       |                        |                        |  |  |                         |                           |  |  |
|                                                                                                                                                                                                                                                                                                                                                                            |                                           |                        |                               |                                                  |         |                         |                             |                   |                       |                                 |                                              |  |                                   |                                           |             |                                   |                                           |               |                                     |                                       |                                     |                                       |                        |                        |  |  |                         |                           |  |  |
|                                                                                                                                                                                                                                                                                                                                                                            |                                           |                        |                               |                                                  |         |                         |                             |                   |                       |                                 |                                              |  |                                   |                                           |             |                                   |                                           |               |                                     |                                       |                                     |                                       |                        |                        |  |  |                         |                           |  |  |
|                                                                                                                                                                                                                                                                                                                                                                            |                                           |                        |                               |                                                  |         |                         |                             |                   |                       |                                 |                                              |  |                                   |                                           |             |                                   |                                           |               |                                     |                                       |                                     |                                       |                        |                        |  |  |                         |                           |  |  |
|                                                                                                                                                                                                                                                                                                                                                                            |                                           |                        |                               |                                                  |         |                         |                             |                   |                       |                                 |                                              |  |                                   |                                           |             |                                   |                                           |               |                                     |                                       |                                     |                                       |                        |                        |  |  |                         |                           |  |  |
|                                                                                                                                                                                                                                                                                                                                                                            |                                           |                        |                               |                                                  |         |                         |                             |                   |                       |                                 |                                              |  |                                   |                                           |             |                                   |                                           |               |                                     |                                       |                                     |                                       |                        |                        |  |  |                         |                           |  |  |
|                                                                                                                                                                                                                                                                                                                                                                            |                                           |                        |                               |                                                  |         |                         |                             |                   |                       |                                 |                                              |  |                                   |                                           |             |                                   |                                           |               |                                     |                                       |                                     |                                       |                        |                        |  |  |                         |                           |  |  |
|                                                                                                                                                                                                                                                                                                                                                                            |                                           |                        |                               |                                                  |         |                         |                             |                   |                       |                                 |                                              |  |                                   |                                           |             |                                   |                                           |               |                                     |                                       |                                     |                                       |                        |                        |  |  |                         |                           |  |  |
|                                                                                                                                                                                                                                                                                                                                                                            |                                           |                        |                               |                                                  |         |                         |                             |                   |                       |                                 |                                              |  |                                   |                                           |             |                                   |                                           |               |                                     |                                       |                                     |                                       |                        |                        |  |  |                         |                           |  |  |
|                                                                                                                                                                                                                                                                                                                                                                            |                                           |                        |                               |                                                  |         |                         |                             |                   |                       |                                 |                                              |  |                                   |                                           |             |                                   |                                           |               |                                     |                                       |                                     |                                       |                        |                        |  |  |                         |                           |  |  |
|                                                                                                                                                                                                                                                                                                                                                                            |                                           |                        |                               |                                                  |         |                         |                             |                   |                       |                                 |                                              |  |                                   |                                           |             |                                   |                                           |               |                                     |                                       |                                     |                                       |                        |                        |  |  |                         |                           |  |  |
|                                                                                                                                                                                                                                                                                                                                                                            |                                           |                        |                               |                                                  |         |                         |                             |                   |                       |                                 |                                              |  |                                   |                                           |             |                                   |                                           |               |                                     |                                       |                                     |                                       |                        |                        |  |  |                         |                           |  |  |
|                                                                                                                                                                                                                                                                                                                                                                            |                                           |                        |                               |                                                  |         |                         |                             |                   |                       |                                 |                                              |  |                                   |                                           |             |                                   |                                           |               |                                     |                                       |                                     |                                       |                        |                        |  |  |                         |                           |  |  |
|                                                                                                                                                                                                                                                                                                                                                                            |                                           |                        |                               |                                                  |         |                         |                             |                   |                       |                                 |                                              |  |                                   |                                           |             |                                   |                                           |               |                                     |                                       |                                     |                                       |                        |                        |  |  |                         |                           |  |  |
|                                                                                                                                                                                                                                                                                                                                                                            |                                           |                        |                               |                                                  |         |                         |                             |                   |                       |                                 |                                              |  |                                   |                                           |             |                                   |                                           |               |                                     |                                       |                                     |                                       |                        |                        |  |  |                         |                           |  |  |
|                                                                                                                                                                                                                                                                                                                                                                            |                                           |                        |                               |                                                  |         |                         |                             |                   |                       |                                 |                                              |  |                                   |                                           |             |                                   |                                           |               |                                     |                                       |                                     |                                       |                        |                        |  |  |                         |                           |  |  |
|                                                                                                                                                                                                                                                                                                                                                                            |                                           |                        |                               |                                                  |         |                         |                             |                   |                       |                                 |                                              |  |                                   |                                           |             |                                   |                                           |               |                                     |                                       |                                     |                                       |                        |                        |  |  |                         |                           |  |  |
|                                                                                                                                                                                                                                                                                                                                                                            |                                           |                        |                               |                                                  |         |                         |                             |                   |                       |                                 |                                              |  |                                   |                                           |             |                                   |                                           |               |                                     |                                       |                                     |                                       |                        |                        |  |  |                         |                           |  |  |
|                                                                                                                                                                                                                                                                                                                                                                            |                                           |                        |                               |                                                  |         |                         |                             |                   |                       |                                 |                                              |  |                                   |                                           |             |                                   |                                           |               |                                     |                                       |                                     |                                       |                        |                        |  |  |                         |                           |  |  |
|                                                                                                                                                                                                                                                                                                                                                                            |                                           |                        |                               |                                                  |         |                         |                             |                   |                       |                                 |                                              |  |                                   |                                           |             |                                   |                                           |               |                                     |                                       |                                     |                                       |                        |                        |  |  |                         |                           |  |  |
|                                                                                                                                                                                                                                                                                                                                                                            |                                           |                        |                               |                                                  |         |                         |                             |                   |                       |                                 |                                              |  |                                   |                                           |             |                                   |                                           |               |                                     |                                       |                                     |                                       |                        |                        |  |  |                         |                           |  |  |
|                                                                                                                                                                                                                                                                                                                                                                            |                                           |                        |                               |                                                  |         |                         |                             |                   |                       |                                 |                                              |  |                                   |                                           |             |                                   |                                           |               |                                     |                                       |                                     |                                       |                        |                        |  |  |                         |                           |  |  |
|                                                                                                                                                                                                                                                                                                                                                                            |                                           |                        |                               |                                                  |         |                         |                             |                   |                       |                                 |                                              |  |                                   |                                           |             |                                   |                                           |               |                                     |                                       |                                     |                                       |                        |                        |  |  |                         |                           |  |  |
|                                                                                                                                                                                                                                                                                                                                                                            |                                           |                        |                               |                                                  |         |                         |                             |                   |                       |                                 |                                              |  |                                   |                                           |             |                                   |                                           |               |                                     |                                       |                                     |                                       |                        |                        |  |  |                         |                           |  |  |
|                                                                                                                                                                                                                                                                                                                                                                            |                                           |                        |                               |                                                  |         |                         |                             |                   |                       |                                 |                                              |  |                                   |                                           |             |                                   |                                           |               |                                     |                                       |                                     |                                       |                        |                        |  |  |                         |                           |  |  |
|                                                                                                                                                                                                                                                                                                                                                                            |                                           |                        |                               |                                                  |         |                         |                             |                   |                       |                                 |                                              |  |                                   |                                           |             |                                   |                                           |               |                                     |                                       |                                     |                                       |                        |                        |  |  |                         |                           |  |  |
|                                                                                                                                                                                                                                                                                                                                                                            |                                           |                        |                               |                                                  |         |                         |                             |                   |                       |                                 |                                              |  |                                   |                                           |             |                                   |                                           |               |                                     |                                       |                                     |                                       |                        |                        |  |  |                         |                           |  |  |
|                                                                                                                                                                                                                                                                                                                                                                            |                                           |                        |                               |                                                  |         |                         |                             |                   |                       |                                 |                                              |  |                                   |                                           |             |                                   |                                           |               |                                     |                                       |                                     |                                       |                        |                        |  |  |                         |                           |  |  |
|                                                                                                                                                                                                                                                                                                                                                                            |                                           |                        |                               |                                                  |         |                         |                             |                   |                       |                                 |                                              |  |                                   |                                           |             |                                   |                                           |               |                                     |                                       |                                     |                                       |                        |                        |  |  |                         |                           |  |  |
|                                                                                                                                                                                                                                                                                                                                                                            |                                           |                        |                               |                                                  |         |                         |                             |                   |                       |                                 |                                              |  |                                   |                                           |             |                                   |                                           |               |                                     |                                       |                                     |                                       |                        |                        |  |  |                         |                           |  |  |
|                                                                                                                                                                                                                                                                                                                                                                            |                                           |                        |                               |                                                  |         |                         |                             |                   |                       |                                 |                                              |  |                                   |                                           |             |                                   |                                           |               |                                     |                                       |                                     |                                       |                        |                        |  |  |                         |                           |  |  |
|                                                                                                                                                                                                                                                                                                                                                                            |                                           |                        |                               |                                                  |         |                         |                             |                   |                       |                                 |                                              |  |                                   |                                           |             |                                   |                                           |               |                                     |                                       |                                     |                                       |                        |                        |  |  |                         |                           |  |  |
|                                                                                                                                                                                                                                                                                                                                                                            |                                           |                        |                               |                                                  |         |                         |                             |                   |                       |                                 |                                              |  |                                   |                                           |             |                                   |                                           |               |                                     |                                       |                                     |                                       |                        |                        |  |  |                         |                           |  |  |
|                                                                                                                                                                                                                                                                                                                                                                            |                                           |                        |                               |                                                  |         |                         |                             |                   |                       |                                 |                                              |  |                                   |                                           |             |                                   |                                           |               |                                     |                                       |                                     |                                       |                        |                        |  |  |                         |                           |  |  |
|                                                                                                                                                                                                                                                                                                                                                                            |                                           |                        |                               |                                                  |         |                         |                             |                   |                       |                                 |                                              |  |                                   |                                           |             |                                   |                                           |               |                                     |                                       |                                     |                                       |                        |                        |  |  |                         |                           |  |  |
|                                                                                                                                                                                                                                                                                                                                                                            |                                           |                        |                               |                                                  |         |                         |                             |                   |                       |                                 |                                              |  |                                   |                                           |             |                                   |                                           |               |                                     |                                       |                                     |                                       |                        |                        |  |  |                         |                           |  |  |
|                                                                                                                                                                                                                                                                                                                                                                            |                                           |                        |                               |                                                  |         |                         |                             |                   |                       |                                 |                                              |  |                                   |                                           |             |                                   |                                           |               |                                     |                                       |                                     |                                       |                        |                        |  |  |                         |                           |  |  |
|                                                                                                                                                                                                                                                                                                                                                                            |                                           |                        |                               |                                                  |         |                         |                             |                   |                       |                                 |                                              |  |                                   |                                           |             |                                   |                                           |               |                                     |                                       |                                     |                                       |                        |                        |  |  |                         |                           |  |  |
|                                                                                                                                                                                                                                                                                                                                                                            |                                           |                        |                               |                                                  |         |                         |                             |                   |                       |                                 |                                              |  |                                   |                                           |             |                                   |                                           |               |                                     |                                       |                                     |                                       |                        |                        |  |  |                         |                           |  |  |
|                                                                                                                                                                                                                                                                                                                                                                            |                                           |                        |                               |                                                  |         |                         |                             |                   |                       |                                 |                                              |  |                                   |                                           |             |                                   |                                           |               |                                     |                                       |                                     |                                       |                        |                        |  |  |                         |                           |  |  |
|                                                                                                                                                                                                                                                                                                                                                                            |                                           |                        |                               |                                                  |         |                         |                             |                   |                       |                                 |                                              |  |                                   |                                           |             |                                   |                                           |               |                                     |                                       |                                     |                                       |                        |                        |  |  |                         |                           |  |  |
|                                                                                                                                                                                                                                                                                                                                                                            |                                           |                        |                               |                                                  |         |                         |                             |                   |                       |                                 |                                              |  |                                   |                                           |             |                                   |                                           |               |                                     |                                       |                                     |                                       |                        |                        |  |  |                         |                           |  |  |
|                                                                                                                                                                                                                                                                                                                                                                            |                                           |                        |                               |                                                  |         |                         |                             |                   |                       |                                 |                                              |  |                                   |                                           |             |                                   |                                           |               |                                     |                                       |                                     |                                       |                        |                        |  |  |                         |                           |  |  |
|                                                                                                                                                                                                                                                                                                                                                                            |                                           |                        |                               |                                                  |         |                         |                             |                   |                       |                                 |                                              |  |                                   |                                           |             |                                   |                                           |               |                                     |                                       |                                     |                                       |                        |                        |  |  |                         |                           |  |  |
|                                                                                                                                                                                                                                                                                                                                                                            |                                           |                        |                               |                                                  |         |                         |                             |                   |                       |                                 |                                              |  |                                   |                                           |             |                                   |                                           |               |                                     |                                       |                                     |                                       |                        |                        |  |  |                         |                           |  |  |
|                                                                                                                                                                                                                                                                                                                                                                            |                                           |                        |                               |                                                  |         |                         |                             |                   |                       |                                 |                                              |  |                                   |                                           |             |                                   |                                           |               |                                     |                                       |                                     |                                       |                        |                        |  |  |                         |                           |  |  |
|                                                                                                                                                                                                                                                                                                                                                                            |                                           |                        |                               |                                                  |         |                         |                             |                   |                       |                                 |                                              |  |                                   |                                           |             |                                   |                                           |               |                                     |                                       |                                     |                                       |                        |                        |  |  |                         |                           |  |  |
|                                                                                                                                                                                                                                                                                                                                                                            |                                           |                        |                               |                                                  |         |                         |                             |                   |                       |                                 |                                              |  |                                   |                                           |             |                                   |                                           |               |                                     |                                       |                                     |                                       |                        |                        |  |  |                         |                           |  |  |
|                                                                                                                                                                                                                                                                                                                                                                            |                                           |                        |                               |                                                  |         |                         |                             |                   |                       |                                 |                                              |  |                                   |                                           |             |                                   |                                           |               |                                     |                                       |                                     |                                       |                        |                        |  |  |                         |                           |  |  |
|                                                                                                                                                                                                                                                                                                                                                                            |                                           |                        |                               |                                                  |         |                         |                             |                   |                       |                                 |                                              |  |                                   |                                           |             |                                   |                                           |               |                                     |                                       |                                     |                                       |                        |                        |  |  |                         |                           |  |  |
|                                                                                                                                                                                                                                                                                                                                                                            |                                           |                        |                               |                                                  |         |                         |                             |                   |                       |                                 |                                              |  |                                   |                                           |             |                                   |                                           |               |                                     |                                       |                                     |                                       |                        |                        |  |  |                         |                           |  |  |
|                                                                                                                                                                                                                                                                                                                                                                            |                                           |                        |                               |                                                  |         |                         |                             |                   |                       |                                 |                                              |  |                                   |                                           |             |                                   |                                           |               |                                     |                                       |                                     |                                       |                        |                        |  |  |                         |                           |  |  |
|                                                                                                                                                                                                                                                                                                                                                                            |                                           |                        |                               |                                                  |         |                         |                             |                   |                       |                                 |                                              |  |                                   |                                           |             |                                   |                                           |               |                                     |                                       |                                     |                                       |                        |                        |  |  |                         |                           |  |  |
|                                                                                                                                                                                                                                                                                                                                                                            |                                           |                        |                               |                                                  |         |                         |                             |                   |                       |                                 |                                              |  |                                   |                                           |             |                                   |                                           |               |                                     |                                       |                                     |                                       |                        |                        |  |  |                         |                           |  |  |
|                                                                                                                                                                                                                                                                                                                                                                            |                                           |                        |                               |                                                  |         |                         |                             |                   |                       |                                 |                                              |  |                                   |                                           |             |                                   |                                           |               |                                     |                                       |                                     |                                       |                        |                        |  |  |                         |                           |  |  |
|                                                                                                                                                                                                                                                                                                                                                                            |                                           |                        |                               |                                                  |         |                         |                             |                   |                       |                                 |                                              |  |                                   |                                           |             |                                   |                                           |               |                                     |                                       |                                     |                                       |                        |                        |  |  |                         |                           |  |  |
|                                                                                                                                                                                                                                                                                                                                                                            |                                           |                        |                               |                                                  |         |                         |                             |                   |                       |                                 |                                              |  |                                   |                                           |             |                                   |                                           |               |                                     |                                       |                                     |                                       |                        |                        |  |  |                         |                           |  |  |
|                                                                                                                                                                                                                                                                                                                                                                            |                                           |                        |                               |                                                  |         |                         |                             |                   |                       |                                 |                                              |  |                                   |                                           |             |                                   |                                           |               |                                     |                                       |                                     |                                       |                        |                        |  |  |                         |                           |  |  |
|                                                                                                                                                                                                                                                                                                                                                                            |                                           |                        |                               |                                                  |         |                         |                             |                   |                       |                                 |                                              |  |                                   |                                           |             |                                   |                                           |               |                                     |                                       |                                     |                                       |                        |                        |  |  |                         |                           |  |  |
|                                                                                                                                                                                                                                                                                                                                                                            |                                           |                        |                               |                                                  |         |                         |                             |                   |                       |                                 |                                              |  |                                   |                                           |             |                                   |                                           |               |                                     |                                       |                                     |                                       |                        |                        |  |  |                         |                           |  |  |
|                                                                                                                                                                                                                                                                                                                                                                            |                                           |                        |                               |                                                  |         |                         |                             |                   |                       |                                 |                                              |  |                                   |                                           |             |                                   |                                           |               |                                     |                                       |                                     |                                       |                        |                        |  |  |                         |                           |  |  |
|                                                                                                                                                                                                                                                                                                                                                                            |                                           |                        |                               |                                                  |         |                         |                             |                   |                       |                                 |                                              |  |                                   |                                           |             |                                   |                                           |               |                                     |                                       |                                     |                                       |                        |                        |  |  |                         |                           |  |  |
|                                                                                                                                                                                                                                                                                                                                                                            |                                           |                        |                               |                                                  |         |                         |                             |                   |                       |                                 |                                              |  |                                   |                                           |             |                                   |                                           |               |                                     |                                       |                                     |                                       |                        |                        |  |  |                         |                           |  |  |
|                                                                                                                                                                                                                                                                                                                                                                            |                                           |                        |                               |                                                  |         |                         |                             |                   |                       |                                 |                                              |  |                                   |                                           |             |                                   |                                           |               |                                     |                                       |                                     |                                       |                        |                        |  |  |                         |                           |  |  |
|                                                                                                                                                                                                                                                                                                                                                                            |                                           |                        |                               |                                                  |         |                         |                             |                   |                       |                                 |                                              |  |                                   |                                           |             |                                   |                                           |               |                                     |                                       |                                     |                                       |                        |                        |  |  |                         |                           |  |  |
|                                                                                                                                                                                                                                                                                                                                                                            |                                           |                        |                               |                                                  |         |                         |                             |                   |                       |                                 |                                              |  |                                   |                                           |             |                                   |                                           |               |                                     |                                       |                                     |                                       |                        |                        |  |  |                         |                           |  |  |
|                                                                                                                                                                                                                                                                                                                                                                            |                                           |                        |                               |                                                  |         |                         |                             |                   |                       |                                 |                                              |  |                                   |                                           |             |                                   |                                           |               |                                     |                                       |                                     |                                       |                        |                        |  |  |                         |                           |  |  |
|                                                                                                                                                                                                                                                                                                                                                                            |                                           |                        |                               |                                                  |         |                         |                             |                   |                       |                                 |                                              |  |                                   |                                           |             |                                   |                                           |               |                                     |                                       |                                     |                                       |                        |                        |  |  |                         |                           |  |  |
|                                                                                                                                                                                                                                                                                                                                                                            |                                           |                        |                               |                                                  |         |                         |                             |                   |                       |                                 |                                              |  |                                   |                                           |             |                                   |                                           |               |                                     |                                       |                                     |                                       |                        |                        |  |  |                         |                           |  |  |
|                                                                                                                                                                                                                                                                                                                                                                            |                                           |                        |                               |                                                  |         |                         |                             |                   |                       |                                 |                                              |  |                                   |                                           |             |                                   |                                           |               |                                     |                                       |                                     |                                       |                        |                        |  |  |                         |                           |  |  |
|                                                                                                                                                                                                                                                                                                                                                                            |                                           |                        |                               |                                                  |         |                         |                             |                   |                       |                                 |                                              |  |                                   |                                           |             |                                   |                                           |               |                                     |                                       |                                     |                                       |                        |                        |  |  |                         |                           |  |  |
|                                                                                                                                                                                                                                                                                                                                                                            |                                           |                        |                               |                                                  |         |                         |                             |                   |                       |                                 |                                              |  |                                   |                                           |             |                                   |                                           |               |                                     |                                       |                                     |                                       |                        |                        |  |  |                         |                           |  |  |
|                                                                                                                                                                                                                                                                                                                                                                            |                                           |                        |                               |                                                  |         |                         |                             |                   |                       |                                 |                                              |  |                                   |                                           |             |                                   |                                           |               |                                     |                                       |                                     |                                       |                        |                        |  |  |                         |                           |  |  |
|                                                                                                                                                                                                                                                                                                                                                                            |                                           |                        |                               |                                                  |         |                         |                             |                   |                       |                                 |                                              |  |                                   |                                           |             |                                   |                                           |               |                                     |                                       |                                     |                                       |                        |                        |  |  |                         |                           |  |  |
|                                                                                                                                                                                                                                                                                                                                                                            |                                           |                        |                               |                                                  |         |                         |                             |                   |                       |                                 |                                              |  |                                   |                                           |             |                                   |                                           |               |                                     |                                       |                                     |                                       |                        |                        |  |  |                         |                           |  |  |
|                                                                                                                                                                                                                                                                                                                                                                            |                                           |                        |                               |                                                  |         |                         |                             |                   |                       |                                 |                                              |  |                                   |                                           |             |                                   |                                           |               |                                     |                                       |                                     |                                       |                        |                        |  |  |                         |                           |  |  |
|                                                                                                                                                                                                                                                                                                                                                                            |                                           |                        |                               |                                                  |         |                         |                             |                   |                       |                                 |                                              |  |                                   |                                           |             |                                   |                                           |               |                                     |                                       |                                     |                                       |                        |                        |  |  |                         |                           |  |  |
|                                                                                                                                                                                                                                                                                                                                                                            |                                           |                        |                               |                                                  |         |                         |                             |                   |                       |                                 |                                              |  |                                   |                                           |             |                                   |                                           |               |                                     |                                       |                                     |                                       |                        |                        |  |  |                         |                           |  |  |
|                                                                                                                                                                                                                                                                                                                                                                            |                                           |                        |                               |                                                  |         |                         |                             |                   |                       |                                 |                                              |  |                                   |                                           |             |                                   |                                           |               |                                     |                                       |                                     |                                       |                        |                        |  |  |                         |                           |  |  |
|                                                                                                                                                                                                                                                                                                                                                                            |                                           |                        |                               |                                                  |         |                         |                             |                   |                       |                                 |                                              |  |                                   |                                           |             |                                   |                                           |               |                                     |                                       |                                     |                                       |                        |                        |  |  |                         |                           |  |  |
|                                                                                                                                                                                                                                                                                                                                                                            |                                           |                        |                               |                                                  |         |                         |                             |                   |                       |                                 |                                              |  |                                   |                                           |             |                                   |                                           |               |                                     |                                       |                                     |                                       |                        |                        |  |  |                         |                           |  |  |
|                                                                                                                                                                                                                                                                                                                                                                            |                                           |                        |                               |                                                  |         |                         |                             |                   |                       |                                 |                                              |  |                                   |                                           |             |                                   |                                           |               |                                     |                                       |                                     |                                       |                        |                        |  |  |                         |                           |  |  |
|                                                                                                                                                                                                                                                                                                                                                                            |                                           |                        |                               |                                                  |         |                         |                             |                   |                       |                                 |                                              |  |                                   |                                           |             |                                   |                                           |               |                                     |                                       |                                     |                                       |                        |                        |  |  |                         |                           |  |  |
|                                                                                                                                                                                                                                                                                                                                                                            |                                           |                        |                               |                                                  |         |                         |                             |                   |                       |                                 |                                              |  |                                   |                                           |             |                                   |                                           |               |                                     |                                       |                                     |                                       |                        |                        |  |  |                         |                           |  |  |

|  |  |  |  |                                                                                                                                                                                                                      |                                                                                                                                                                                                                                         |  |  |  |
|--|--|--|--|----------------------------------------------------------------------------------------------------------------------------------------------------------------------------------------------------------------------|-----------------------------------------------------------------------------------------------------------------------------------------------------------------------------------------------------------------------------------------|--|--|--|
|  |  |  |  | <p>Upregulated genes involved in:</p> <p>(a) Cancer pathways<br/> (b) Hematologic disease<br/> (c) Post-transcriptional modification of RNA<br/> (d) Development of connective tissue<br/> (e) Metabolic disease</p> | <p>Note:<br/> Downregulated genes involved in:</p> <p>(a) Lipid metabolism<br/> (b) Transportation<br/> (c) Cell-cell interaction signaling<br/> (d) Carbohydrate metabolism<br/> (e) Development and function of connective tissue</p> |  |  |  |
|--|--|--|--|----------------------------------------------------------------------------------------------------------------------------------------------------------------------------------------------------------------------|-----------------------------------------------------------------------------------------------------------------------------------------------------------------------------------------------------------------------------------------|--|--|--|

Genes, method, N, mean age, BMI (body mass index), reported or calculated fold change, upregulated or downregulated genes, reference. Highlighted genes are those found in the intersection of comparisons between post-RYGB vs obese and lean vs obese. Bold font appoints significance.

## Lean vs obese

| Method                                                                                                                                                  | Characteristics of the groups                                        |                          | Gene expression fold change (Lean vs Obese)                                                                                                                                                                                                                                                                                                                                                                                                                                                                       |                                                                                                                                                                   | Reference             |
|---------------------------------------------------------------------------------------------------------------------------------------------------------|----------------------------------------------------------------------|--------------------------|-------------------------------------------------------------------------------------------------------------------------------------------------------------------------------------------------------------------------------------------------------------------------------------------------------------------------------------------------------------------------------------------------------------------------------------------------------------------------------------------------------------------|-------------------------------------------------------------------------------------------------------------------------------------------------------------------|-----------------------|
|                                                                                                                                                         | Patients data/<br>Recruitment country                                | BMI (kg/m <sup>2</sup> ) | Reported fold change [(Lean/Obese)-1]                                                                                                                                                                                                                                                                                                                                                                                                                                                                             |                                                                                                                                                                   |                       |
|                                                                                                                                                         |                                                                      |                          | Upregulated expression in lean (+)                                                                                                                                                                                                                                                                                                                                                                                                                                                                                | Downregulated expression in lean (-)                                                                                                                              |                       |
|                                                                                                                                                         |                                                                      |                          | 3,576 upregulated genes in lean                                                                                                                                                                                                                                                                                                                                                                                                                                                                                   | 2,420 downregulated genes in lean                                                                                                                                 |                       |
| <b>gPCR</b><br>Candidate genes from microarray data<br>Affymetrix GeneChip Human Gene 2.0 ST array<br>>24,838 transcripts between post-surgery vs Obese | <b>Lean:</b><br>26 lean of 45±5 years                                | <b>Lean:</b><br>~24±2    | <b>EGR1 (5.34)</b><br><b>FOS (2.97)</b><br><b>PKP2 (2.20)</b><br><b>ELOVL6 (2.00)</b><br><b>DUSP1 (1.85)</b><br><b>GYS2 (1.76)</b><br><b>SLC27A2 (1.14)</b><br><b>IL-6 (0.66)</b><br><b>GLUT4 (0.63)</b><br><i>RGS1 (0.52)</i><br><b>DECRI (0.51)</b><br><b>OLFM2 (0.51)</b><br><b>ACSL1 (0.47)</b><br><b>LGALS12 (0.44)</b><br><b>FASN (0.43)</b><br><b>ACLY (0.43)</b><br><b>THRSP14 (0.43)</b><br><b>IRS-1 (0.42)</b><br><b>ECI1 (0.29)</b><br><i>TNFα (0.18)</i><br><i>SCD1 (0.12)</i><br><i>ACACA (0.03)</i> | <b>LYZ (-0.70)</b><br><b>SPP1 (-0.70)</b><br><b>PRG4 (-0.69)</b><br><b>EGFL6 (-0.64)</b><br><b>AQP9 (-0.56)</b><br><b>IQ6GAP2 (-0.52)</b><br><b>KPNA2 (-0.29)</b> | (Ortega et al., 2015) |
| Candidate genes involved in:<br>(a) Cell cycle<br>(b) Development<br>(c) Lipid metabolism<br>(d) Inflammatory response                                  | <b>Obese:</b><br>25 obese of 48±10 years<br><br><b>Girona, Spain</b> | <b>Obese:</b><br>~43±5   |                                                                                                                                                                                                                                                                                                                                                                                                                                                                                                                   |                                                                                                                                                                   |                       |
|                                                                                                                                                         |                                                                      |                          | Note: Fold change reported without percentage                                                                                                                                                                                                                                                                                                                                                                                                                                                                     | Note: Fold change reported without percentage                                                                                                                     |                       |

Genes, method, N, mean age, BMI (body mass index), reported or calculated fold change, upregulated or downregulated genes, reference. Highlighted genes are those found in the intersection of comparisons between post-RYGB vs obese and lean vs obese. Bold font appoints significance.

## Post-RYGB vs Obese

| Method                                                                                  | Characteristics of the groups                                                 | Bariatric surgery data | BMI data (kg/m <sup>2</sup> )                                             | Gene expression fold change (Post RYGB vs Obese)                                   |                                              | Reference             |
|-----------------------------------------------------------------------------------------|-------------------------------------------------------------------------------|------------------------|---------------------------------------------------------------------------|------------------------------------------------------------------------------------|----------------------------------------------|-----------------------|
|                                                                                         | Patients data/ <b>Recruitment country</b>                                     |                        |                                                                           | Reported gene expression                                                           | Calculated fold change [(Post-RYGB/Obese)-1] |                       |
| <b>Microarrays</b>                                                                      |                                                                               |                        |                                                                           | Upregulated expression post-RYGB (+)                                               |                                              |                       |
| Affymetrix Human Gene 1.1 (Affymetrix , Inc., Santa Clara, CA) >28,000 transcripts      | <b>Obese:</b><br>16 obese of ~46 ± 2 years                                    | RYGB                   | <b>Obese:</b><br>~41 ± 1                                                  | <i>TGFB1</i><br><i>CXCL2</i><br><i>FGF2</i><br><i>OGN</i><br><i>PDGFD</i>          | Not calculated                               | (Petrus et al., 2018) |
| They focused on associated genes with adipocyte number change in obesity and post-RYGB. | <b>Post-RYGB:</b><br>16 patients of ~48 ± 2 years<br><b>Stockholm, Sweden</b> | 2 years                | <b>Post-RYGB:</b><br>~25 ± 1<br><br><b>ΔBMI:</b><br>~16 kg/m <sup>2</sup> | Upregulated genes involved in growth factors and extracellular matrix organization |                                              |                       |

## Lean vs Obese

| Method                                                                             | Characteristics of the groups                                          | BMI (kg/m <sup>2</sup> )                   | Gene expression fold change (Lean vs Obese) |                                         | Reference             |
|------------------------------------------------------------------------------------|------------------------------------------------------------------------|--------------------------------------------|---------------------------------------------|-----------------------------------------|-----------------------|
|                                                                                    | Patients data/ <b>Recruitment country</b>                              |                                            | Reported gene expression                    | Calculated fold change [(Lean/Obese)-1] |                       |
| <b>Microarrays</b>                                                                 |                                                                        |                                            | Upregulated genes in lean (+)               | Downregulated genes in lean (-)         |                       |
| Affymetrix Human Gene 1.1 (Affymetrix , Inc., Santa Clara, CA) >28,000 transcripts | <b>Lean:</b><br>16 lean of ~48 ± 2 years                               | <b>Lean:</b><br>~25 kg/m <sup>2</sup>      |                                             |                                         | (Petrus et al., 2018) |
|                                                                                    | <b>Obese:</b><br>16 obese of ~46 ± 2 years<br><b>Stockholm, Sweden</b> | <b>Obese:</b><br>~41 ± 1 kg/m <sup>2</sup> | Not reported                                | <i>TGFB1</i><br><i>TGFB3</i>            | Not calculated        |

Genes, method, N, mean age, BMI (body mass index), reported or calculated fold change, upregulated or downregulated genes, reference. Highlighted genes are those found in the intersection of comparisons between post-RYGB vs obese and lean vs obese. Bold font appoints significance.

| Method                                                                 | Characteristics of the groups             | Bariatric surgery data | BMI data (kg/m <sup>2</sup> ) | Gene expression fold change (Post RYGB vs Obese) |                                                                                                                                                                                                                                                                                                                                                                                                                                                                                                                                                                                                                                                                                                                                                                                                                                                                                                                                                                                                                                             | Reference         |
|------------------------------------------------------------------------|-------------------------------------------|------------------------|-------------------------------|--------------------------------------------------|---------------------------------------------------------------------------------------------------------------------------------------------------------------------------------------------------------------------------------------------------------------------------------------------------------------------------------------------------------------------------------------------------------------------------------------------------------------------------------------------------------------------------------------------------------------------------------------------------------------------------------------------------------------------------------------------------------------------------------------------------------------------------------------------------------------------------------------------------------------------------------------------------------------------------------------------------------------------------------------------------------------------------------------------|-------------------|
|                                                                        | Patients data/ <b>Recruitment country</b> |                        |                               | Calculated fold change [(Post-RYGB/Obese)-1]     |                                                                                                                                                                                                                                                                                                                                                                                                                                                                                                                                                                                                                                                                                                                                                                                                                                                                                                                                                                                                                                             |                   |
|                                                                        |                                           |                        |                               | Upregulated expression post-RYGB (+)             | Downregulated expression post-RYGB (-)                                                                                                                                                                                                                                                                                                                                                                                                                                                                                                                                                                                                                                                                                                                                                                                                                                                                                                                                                                                                      |                   |
|                                                                        |                                           |                        |                               | 2,420 upregulated genes post-RYGB                | 3,576 downregulated genes post-RYGB                                                                                                                                                                                                                                                                                                                                                                                                                                                                                                                                                                                                                                                                                                                                                                                                                                                                                                                                                                                                         |                   |
|                                                                        |                                           |                        |                               |                                                  | <p><i>GPR183</i> (-0.66)</p> <p><i>LYZ</i> (-0.65)</p> <p><i>CLEC7A</i> (-0.63)</p> <p><i>LCP1</i> (-0.63)</p> <p><i>NDUFS2</i> (-0.63)</p> <p><i>VSIG4</i> (-0.63)</p> <p><i>MS4A7</i> (-0.62)</p> <p><i>AQP9</i> (-0.61)</p> <p><i>NCKAP1L</i> (-0.6)</p> <p><i>CTSS</i> (-0.59)</p> <p><i>GLIPR1</i> (-0.59)</p> <p><i>CYBB</i> (-0.58)</p> <p><i>IGSF6</i> (-0.58)</p> <p><i>PLEK</i> (-0.58)</p> <p><i>CD163</i> (-0.57)</p> <p><i>MS4A6A</i> (-0.57)</p> <p><i>TLR8</i> (-0.57)</p> <p><i>BCAT1</i> (-0.56)</p> <p><i>TYROBP</i> (-0.56)</p> <p><i>AIF1</i> (-0.55)</p> <p><i>CD53</i> (-0.55)</p> <p><i>FCGR2A</i> (-0.55)</p> <p><i>CD68</i> (-0.54)</p> <p><i>FCGR3A</i> (-0.54)</p> <p><i>TBXAS1</i> (-0.54)</p> <p><i>CTD-2370N5.3</i> (-0.53)</p> <p><i>RNASE6</i> (-0.53)</p> <p><i>CPVL</i> (-0.52)</p> <p><i>F13A1</i> (-0.51)</p> <p><i>SAMSN1</i> (-0.51)</p> <p><i>CD4</i> (-0.5)</p> <p><i>FOLR2</i> (-0.49)</p> <p><i>IQGAP2</i> (-0.49)</p>                                                                            |                   |
|                                                                        |                                           |                        |                               |                                                  | <p><i>PTPRC</i> (-0.49)</p> <p><i>KYNU</i> (-0.48)</p> <p><i>VAMP8</i> (-0.48)</p> <p><i>RGS10</i> (-0.47)</p> <p><i>CR1</i> (-0.46)</p> <p><i>ITGAM</i> (-0.46)</p> <p><i>LYVE1</i> (-0.45)</p> <p><i>SELPLG</i> (-0.45)</p> <p><i>ADAP2</i> (-0.44)</p> <p><i>ALOX5AP</i> (-0.44)</p> <p><i>AMICA1</i> (-0.44)</p> <p><i>ARRB2</i> (-0.44)</p> <p><i>CSF1R</i> (-0.44)</p> <p><i>ARHGAP30</i> (-0.43)</p> <p><i>BIN2</i> (-0.43)</p> <p><i>RPS6KA1</i> (-0.43)</p> <p><i>SLC7A7</i> (-0.42)</p> <p><i>GPR137B</i> (-0.4)</p> <p><i>RASSF2</i> (-0.4)</p> <p><i>CD300A</i> (-0.39)</p> <p><i>SYK</i> (-0.39)</p> <p><i>CD163L1</i> (-0.38)</p> <p><i>CHST11</i> (-0.37)</p> <p><i>DOCK10</i> (-0.37)</p> <p><i>PIK3R5</i> (-0.37)</p> <p><i>RNASET2</i> (-0.35)</p> <p><i>CATG0000007766.1</i> (-0.34)</p> <p><i>CHST15</i> (-0.33)</p> <p><i>CTSH</i> (-0.33)</p> <p><i>HCLS1</i> (-0.33)</p> <p><i>PPT1</i> (-0.33)</p> <p><i>SAMHD1</i> (-0.33)</p> <p><i>SMAP2</i> (-0.31)</p> <p><i>SRGN</i> (-0.31)</p> <p><i>PTPLAD2</i> (-0.3)</p> |                   |
| <b>Microarrays</b>                                                     | <b>Obese:</b>                             |                        | <b>Obese:</b>                 |                                                  |                                                                                                                                                                                                                                                                                                                                                                                                                                                                                                                                                                                                                                                                                                                                                                                                                                                                                                                                                                                                                                             |                   |
| ClariomTM D arrays                                                     | 50 obese of 43±9 years                    |                        | 43±5                          |                                                  |                                                                                                                                                                                                                                                                                                                                                                                                                                                                                                                                                                                                                                                                                                                                                                                                                                                                                                                                                                                                                                             |                   |
| 19,418 transcripts excluding non-coding mRNAs                          |                                           | RYGB                   |                               |                                                  |                                                                                                                                                                                                                                                                                                                                                                                                                                                                                                                                                                                                                                                                                                                                                                                                                                                                                                                                                                                                                                             |                   |
| Focused on inflammatory genes with cutt-of of p-value 10 <sup>-8</sup> | <b>Post-RYGB:</b>                         | 2 years                | <b>Post-RYGB:</b>             |                                                  |                                                                                                                                                                                                                                                                                                                                                                                                                                                                                                                                                                                                                                                                                                                                                                                                                                                                                                                                                                                                                                             |                   |
|                                                                        | 49 patients post-RYGB of 45±9 years       |                        | 29±4                          |                                                  |                                                                                                                                                                                                                                                                                                                                                                                                                                                                                                                                                                                                                                                                                                                                                                                                                                                                                                                                                                                                                                             |                   |
|                                                                        | The surgery candidates                    |                        | <b>ΔBMI:</b>                  |                                                  |                                                                                                                                                                                                                                                                                                                                                                                                                                                                                                                                                                                                                                                                                                                                                                                                                                                                                                                                                                                                                                             |                   |
|                                                                        |                                           |                        | ~14 kg/m <sup>2</sup>         |                                                  |                                                                                                                                                                                                                                                                                                                                                                                                                                                                                                                                                                                                                                                                                                                                                                                                                                                                                                                                                                                                                                             |                   |
|                                                                        | <b>Stockholm, Sweden</b>                  |                        |                               |                                                  |                                                                                                                                                                                                                                                                                                                                                                                                                                                                                                                                                                                                                                                                                                                                                                                                                                                                                                                                                                                                                                             |                   |
|                                                                        |                                           |                        |                               |                                                  |                                                                                                                                                                                                                                                                                                                                                                                                                                                                                                                                                                                                                                                                                                                                                                                                                                                                                                                                                                                                                                             | Kerr et al., 2020 |



Note: Upregulated expression related to protein translation, cell differentiation, and metabolism.

Note: Some genes with p-value cut-off different than  $10^{-8}$  but if  $p < 0.05$ , were (Calculated fold change at 2 years post-RYGB):

**SLC2A4 (1.00)**  
**IRS-1 (0.39)**  
**ACSL1 (0.15)**  
**PLIN1 (0.12)**  
**ADIPOQ (0.09)**

**HGF (-0.29)**  
**PYCARD (-0.29)**  
**QPCT (-0.29)**  
**FUCA1 (-0.27)**  
**NAIP (-0.27)**  
**PIK3AP1 (-0.26)**  
**RNASE1 (-0.25)**  
**SLC18B1 (-0.25)**  
**EZR (-0.22)**  
**CNPY3 (-0.19)**

Note: downregulated and involved in immune and inflammatory responses.

Note: Some genes with p-value cut-off different than  $10^{-8}$  but if  $p < 0.05$ , were (Calculated fold change at 2 years post-RYGB):

**IL-6 (-0.42)**

Genes, method, N, mean age, BMI (body mass index), reported or calculated fold change, upregulated or downregulated genes, reference. Highlighted genes are those found in the intersection of comparisons between post-RYGB vs obese and lean vs obese. Bold font appoints significance.

# Post-RYGB vs obese

| Method                                                                                                                                                                       | Characteristics of the groups                                                                                                           | Bariatric surgery data | BMI data (kg/m <sup>2</sup> )                                                                       | Gene expression fold change (Post RYGB vs Obese)                                                                                                                                                                                 |                                        |                                                                                                                                                                                                                                                                                                                                                                                                                                                                                                                                                                                                                                                                                                                                                                                                                                                                                                                                                                                                                                                                      | Reference           |
|------------------------------------------------------------------------------------------------------------------------------------------------------------------------------|-----------------------------------------------------------------------------------------------------------------------------------------|------------------------|-----------------------------------------------------------------------------------------------------|----------------------------------------------------------------------------------------------------------------------------------------------------------------------------------------------------------------------------------|----------------------------------------|----------------------------------------------------------------------------------------------------------------------------------------------------------------------------------------------------------------------------------------------------------------------------------------------------------------------------------------------------------------------------------------------------------------------------------------------------------------------------------------------------------------------------------------------------------------------------------------------------------------------------------------------------------------------------------------------------------------------------------------------------------------------------------------------------------------------------------------------------------------------------------------------------------------------------------------------------------------------------------------------------------------------------------------------------------------------|---------------------|
|                                                                                                                                                                              |                                                                                                                                         |                        |                                                                                                     | Calculated fold change [(Post-RYGB/Obese)-1]                                                                                                                                                                                     |                                        |                                                                                                                                                                                                                                                                                                                                                                                                                                                                                                                                                                                                                                                                                                                                                                                                                                                                                                                                                                                                                                                                      |                     |
|                                                                                                                                                                              |                                                                                                                                         |                        |                                                                                                     | Upregulated expression post-RYGB(+)                                                                                                                                                                                              | Downregulated expression post-RYGB(+)  |                                                                                                                                                                                                                                                                                                                                                                                                                                                                                                                                                                                                                                                                                                                                                                                                                                                                                                                                                                                                                                                                      |                     |
| <b>Microarrays</b><br><br>ClariomTM D arrays<br><br>19,418 transcripts excluding non-coding mRNAs<br><br>Focused on inflammatory genes with p-value cut-off 10 <sup>-8</sup> | <b>Obese:</b><br><br>50 Obese of 43±9 years<br><br><b>Post-RYGB:</b><br><br>38 post-RYGB of 47±10 years<br><br><b>Stockholm, Sweden</b> | RYGB<br><br>5 years    | <b>Obese:</b><br>43±5<br><br><b>Post-RYGB:</b><br>32±6<br><br><b>ΔBMI:</b><br>~11 kg/m <sup>2</sup> | 1,653 upregulated genes post-RYGB                                                                                                                                                                                                | 3,930 downregulated genes post-RYGB    | <i>PTPRC</i> (-0.63)<br><i>BIN2</i> (-0.61)<br><i>ADAP2</i> (-0.61)<br><i>SELPLG</i> (-0.61)<br><i>LYVE1</i> (-0.6)<br><i>KYNU</i> (-0.6)<br><i>IQGAP2</i> (-0.6)<br><i>ALOX5AP</i> (-0.59)<br><i>CSF1R</i> (-0.59)<br><i>CR1</i> (-0.59)<br><i>VAMP8</i> (-0.59)<br><i>DOCK10</i> (-0.57)<br><i>RPS6KA1</i> (-0.57)<br><i>ITGAM</i> (-0.57)<br><i>ARRB2</i> (-0.56)<br><i>ARHGAP30</i> (-0.55)<br><i>SYK</i> (-0.54)<br><i>RASSF2</i> (-0.54)<br><i>SLC4A4</i> (-0.53)<br><i>PIK3R5</i> (-0.51)<br><i>CD300A</i> (-0.51)<br><i>CD163L1</i> (-0.5)<br><i>CHST11</i> (-0.49)<br><i>RNASET2</i> (-0.48)<br><i>SRGN</i> (-0.46)<br><i>CTSH</i> (-0.46)<br><i>CHST15</i> (-0.45)<br><i>SAMHD1</i> (-0.45)<br><i>SMAP2</i> (-0.44)<br><i>SLC7A7</i> (-0.44)<br><i>PTPLAD2</i> (-0.43)<br><i>PPT1</i> (-0.43)<br><i>QPCT</i> (-0.42)<br><i>CATG00000077766.1</i> (-0.42)<br><i>FUCA1</i> (-0.4)<br><i>EZR</i> (-0.39)<br><i>PIK3AP1</i> (-0.38)<br><i>PYCARD</i> (-0.38)<br><i>RNASE1</i> (-0.36)<br><i>NAIP</i> (-0.34)<br><i>SLC18B1</i> (-0.33)<br><i>CNPY3</i> (-0.28) | (Kerr et al., 2020) |
|                                                                                                                                                                              |                                                                                                                                         |                        |                                                                                                     | Reported fold change (Post-RYGB/Obese)                                                                                                                                                                                           | Reported fold change (Post-RYGB/Obese) | <i>AQP9</i> (-0.77)<br><i>LYZ</i> (-0.78)<br><i>CLEC7A</i> (-0.77)<br><i>LCP1</i> (-0.76)<br><i>MS4A7</i> (-0.75)<br><i>NDUFS2</i> (-0.75)<br><i>VSIG4</i> (-0.75)<br><i>FCGR3A</i> (-0.72)<br><i>TBXAS1</i> (-0.72)<br><i>CD53</i> (-0.72)<br><i>CYBB</i> (-0.72)<br><i>IGSF6</i> (-0.72)<br><i>CTSS</i> (-0.72)<br><i>TYROBP</i> (-0.71)<br><i>NCKAP1L</i> (-0.71)<br><i>HGF</i> (-0.7)<br><i>HCLS1</i> (-0.7)<br><i>GPR137B</i> (-0.7)<br><i>CD163</i> (-0.7)<br><i>GL IPR1</i> (-0.7)<br><i>GPR183</i> (-0.7)<br><i>MS4A6A</i> (-0.69)<br><i>TLR8</i> (-0.69)<br><i>CPVL</i> (-0.68)<br><i>FCGR2A</i> (-0.68)<br><i>SAMSN1</i> (-0.67)<br><i>CTD-2370N5.3</i> (-0.67)<br><i>AIF1</i> (-0.67)<br><i>BCAT1</i> (-0.66)<br><i>C1QB</i> (-0.65)<br><i>FOLR2</i> (-0.65)<br><i>F13A1</i> (-0.65)<br><i>RNASE6</i> (-0.65)<br><i>CD4</i> (-0.64)<br><i>CD68</i> (-0.63)<br><i>AMICA1</i> (-0.63)<br><i>RGS10</i> (-0.63)                                                                                                                                               |                     |
|                                                                                                                                                                              |                                                                                                                                         |                        |                                                                                                     | <i>PKP2</i> (2.09)<br><i>FASN</i> (1.14)<br><i>COX14</i> (0.74)<br><i>NEDD4L</i> (0.56)<br><i>RNF157</i> (0.51)<br><i>PDE3B</i> (0.43)<br><i>PLEK</i> (0.43)<br><i>TENM3</i> (0.41)<br><i>PRKAR2B</i> (0.4)<br><i>AQP7</i> (0.4) |                                        |                                                                                                                                                                                                                                                                                                                                                                                                                                                                                                                                                                                                                                                                                                                                                                                                                                                                                                                                                                                                                                                                      |                     |
|                                                                                                                                                                              |                                                                                                                                         |                        |                                                                                                     | Note: Upregulated genes involved in lipid metabolism, adipocyte differentiation and function.                                                                                                                                    |                                        |                                                                                                                                                                                                                                                                                                                                                                                                                                                                                                                                                                                                                                                                                                                                                                                                                                                                                                                                                                                                                                                                      |                     |
|                                                                                                                                                                              |                                                                                                                                         |                        |                                                                                                     | Note: Some genes with p-value cut-off different than 10 <sup>-8</sup> but if p<0.05, were (Calculated fold change at 2 years post-RYGB):                                                                                         |                                        |                                                                                                                                                                                                                                                                                                                                                                                                                                                                                                                                                                                                                                                                                                                                                                                                                                                                                                                                                                                                                                                                      |                     |
|                                                                                                                                                                              |                                                                                                                                         |                        |                                                                                                     | <i>SLC2A4</i> (1.13)<br><i>IRS-1</i> (0.39)<br><i>ACSL1</i> (0.20)<br><i>PLIN1</i> (0.15)<br><i>ADIPOQ</i> (0.09)                                                                                                                |                                        |                                                                                                                                                                                                                                                                                                                                                                                                                                                                                                                                                                                                                                                                                                                                                                                                                                                                                                                                                                                                                                                                      |                     |
|                                                                                                                                                                              |                                                                                                                                         |                        |                                                                                                     |                                                                                                                                                                                                                                  |                                        | Note: Downregulated genes involved in immune response and cytokines production<br>Note: Some genes with p-value cut-off different than 10 <sup>-8</sup> but if p<0.05, were (Calculated fold change at 2 years post-RYGB):<br><i>IL-6</i> (-0.48)                                                                                                                                                                                                                                                                                                                                                                                                                                                                                                                                                                                                                                                                                                                                                                                                                    |                     |
|                                                                                                                                                                              |                                                                                                                                         |                        |                                                                                                     |                                                                                                                                                                                                                                  |                                        |                                                                                                                                                                                                                                                                                                                                                                                                                                                                                                                                                                                                                                                                                                                                                                                                                                                                                                                                                                                                                                                                      |                     |
|                                                                                                                                                                              |                                                                                                                                         |                        |                                                                                                     |                                                                                                                                                                                                                                  |                                        |                                                                                                                                                                                                                                                                                                                                                                                                                                                                                                                                                                                                                                                                                                                                                                                                                                                                                                                                                                                                                                                                      |                     |
|                                                                                                                                                                              |                                                                                                                                         |                        |                                                                                                     |                                                                                                                                                                                                                                  |                                        |                                                                                                                                                                                                                                                                                                                                                                                                                                                                                                                                                                                                                                                                                                                                                                                                                                                                                                                                                                                                                                                                      |                     |

Genes, method, N, mean age, BMI (body mass index), reported or calculated fold change, upregulated or downregulated genes, reference. Highlighted genes are those found in the intersection of comparisons between post-RYGB vs obese and lean vs obese. Bold font appoints significance.

## Lean vs obese

| Method                                     | Characteristics of the groups                    |                             | Gene expression fold change<br>(Lean vs Obese)            |                                            | Reference               |
|--------------------------------------------|--------------------------------------------------|-----------------------------|-----------------------------------------------------------|--------------------------------------------|-------------------------|
|                                            | Patients<br>data/ <b>Recruitment<br/>country</b> | BMI<br>(kg/m <sup>2</sup> ) | Reported gene expression values<br>( <b>Obese; Lean</b> ) | Calculated fold change<br>[(Lean/Obese)-1] |                         |
|                                            |                                                  |                             | <b>Downregulated expression in lean (-)</b>               |                                            |                         |
|                                            |                                                  |                             | Logarithmic conversion                                    | Downregulated<br>expression in lean (-)    |                         |
|                                            |                                                  |                             | <i>LCP1</i> (584.07;229.13)                               | <i>LCP1</i> (-0.61)                        |                         |
|                                            |                                                  |                             | <i>GPR183</i> (265.03;108.38)                             | <i>GPR183</i> (-0.59)                      |                         |
|                                            |                                                  |                             | <i>GLIPR1</i> (504.95;218.27)                             | <i>GLIPR1</i> (-0.57)                      |                         |
|                                            |                                                  |                             | <i>VSIG4</i> (364.56;162.02)                              | <i>VSIG4</i> (-0.56)                       |                         |
|                                            |                                                  |                             | <i>LYZ</i> (1710.26;765.36)                               | <i>LYZ</i> (-0.55)                         |                         |
|                                            |                                                  |                             | <i>SAMSN1</i> (44.94;20.39)                               | <i>SAMSN1</i> (-0.55)                      |                         |
|                                            |                                                  |                             | <i>CD53</i> (572.05;259.57)                               | <i>CD53</i> (-0.55)                        |                         |
|                                            |                                                  |                             | <i>PLEK</i> (104.69;47.84)                                | <i>PLEK</i> (-0.54)                        |                         |
|                                            |                                                  |                             | <i>NCKAP1L</i> (179.77;82.71)                             | <i>NCKAP1L</i> (-0.54)                     |                         |
|                                            |                                                  |                             | <i>CTSS</i> (657.11;306.55)                               | <i>CTSS</i> (-0.53)                        | <i>SAMHD1</i> (-0.33)   |
|                                            |                                                  |                             | <i>CLEC7A</i> (113.77;53.08)                              | <i>CLEC7A</i> (-0.53)                      | <i>LGMN</i> (-0.32)     |
|                                            |                                                  |                             | <i>FCGR3A</i> (112.21;53.82)                              | <i>FCGR3A</i> (-0.52)                      | <i>HGF</i> (-0.31)      |
|                                            |                                                  |                             | <i>CYBB</i> (596.34;290.02)                               | <i>CYBB</i> (-0.51)                        | <i>CORO1A</i> (-0.31)   |
|                                            |                                                  |                             | <i>MNDA</i> (38.32;19.03)                                 | <i>MNDA</i> (-0.5)                         | <i>S100A8</i> (-0.3)    |
|                                            |                                                  |                             | <i>TLR8</i> (34.54;17.39)                                 | <i>TLR8</i> (-0.5)                         | <i>LY96</i> (-0.3)      |
|                                            |                                                  |                             | <i>CD68</i> (1089.92;556.41)                              | <i>CD68</i> (-0.49)                        | <i>CD48</i> (-0.29)     |
|                                            |                                                  |                             | <i>FCGR2A</i> (1009.9;519.15)                             | <i>FCGR2A</i> (-0.49)                      | <i>FCER1A</i> (-0.29)   |
|                                            |                                                  |                             | <i>TYROBP</i> (1686.71;879.17)                            | <i>TYROBP</i> (-0.48)                      | <i>FUCA1</i> (-0.27)    |
|                                            |                                                  |                             | <i>FCGR3B</i> (108.38;57.68)                              | <i>FCGR3B</i> (-0.47)                      | <i>QPCT</i> (-0.26)     |
|                                            |                                                  |                             | <i>AIF1</i> (1168.14;625.99)                              | <i>AIF1</i> (-0.46)                        | <i>NPC2</i> (-0.25)     |
|                                            |                                                  |                             | <i>IQGAP2</i> (126.24;67.65)                              | <i>IQGAP2</i> (-0.46)                      | <i>PIK3AP1</i> (-0.24)  |
|                                            |                                                  |                             | <i>BIN2</i> (89.88;49.52)                                 | <i>BIN2</i> (-0.45)                        | <i>SELL</i> (-0.22)     |
|                                            |                                                  |                             | <i>VAMP8</i> (100.43;56.1)                                | <i>VAMP8</i> (-0.44)                       | <i>EZR</i> (-0.19)      |
|                                            |                                                  |                             | <i>CR1</i> (39.4;22.78)                                   | <i>CR1</i> (-0.42)                         | <i>CTSC</i> (-0.19)     |
|                                            |                                                  |                             | <i>PTPRC</i> (439.59;254.23)                              | <i>PTPRC</i> (-0.42)                       | <i>CNPY3</i> (-0.17)    |
|                                            |                                                  |                             | <i>PRKCB</i> (61.82;36.5)                                 | <i>PRKCB</i> (-0.41)                       | <i>GMFG</i> (-0.17)     |
|                                            |                                                  |                             | <i>RPS6KA1</i> (45.89;27.1)                               | <i>RPS6KA1</i> (-0.41)                     | <i>TNFRSF1B</i> (-0.14) |
|                                            |                                                  |                             | <i>FOLR2</i> (265.03;157.59)                              | <i>FOLR2</i> (-0.41)                       | <i>ZC3HAV1</i> (-0.1)   |
|                                            |                                                  |                             | <i>SYK</i> (40.5;24.42)                                   | <i>SYK</i> (-0.4)                          | <i>FGL2</i> (-0.07)     |
|                                            |                                                  |                             | <i>ITGAM</i> (121.1;73.01)                                | <i>ITGAM</i> (-0.4)                        | <i>CYLD</i> (-0.05)     |
|                                            |                                                  |                             | <i>FPR1</i> (63.56;38.59)                                 | <i>ITGAM</i> (-0.4)                        |                         |
|                                            |                                                  |                             | <i>CXCR4</i> (276.28;167.73)                              | <i>FPR1</i> (-0.39)                        |                         |
|                                            |                                                  |                             | <i>LY86</i> (99.73;61.39)                                 | <i>CXCR4</i> (-0.39)                       |                         |
|                                            |                                                  |                             | <i>CD4</i> (148.06;91.14)                                 | <i>LY86</i> (-0.38)                        |                         |
|                                            |                                                  |                             | <i>C1QA</i> (430.54;265.03)                               | <i>CD4</i> (-0.38)                         |                         |
|                                            |                                                  |                             | <i>ALOX5AP</i> (568.1;352.14)                             | <i>C1QA</i> (-0.38)                        |                         |
|                                            |                                                  |                             | <i>ARRB2</i> (634.73;398.93)                              | <i>ALOX5AP</i> (-0.38)                     |                         |
|                                            |                                                  |                             | <i>MYO1F</i> (245.57;158.68)                              | <i>ARRB2</i> (-0.37)                       |                         |
|                                            |                                                  |                             | <i>RNASET2</i> (157.59;103.97)                            | <i>MYO1F</i> (-0.35)                       |                         |
|                                            |                                                  |                             |                                                           | <i>RNASET2</i> (-0.34)                     |                         |
| <b>Microarrays</b>                         | <b>Lean:</b><br>28 lean of 44±9<br>years         | <b>Lean:</b><br>27±5        |                                                           |                                            |                         |
| ClariomTM D arrays<br>>540,000 transcripts |                                                  |                             |                                                           |                                            |                         |
| Focus on<br>inflammatory genes             | <b>Obese:</b><br>50 obese of 43±9<br>years       | <b>Obese:</b><br>43±5       |                                                           |                                            |                         |
|                                            | <b>Stockholm,<br/>Sweden</b>                     |                             |                                                           |                                            |                         |
|                                            |                                                  |                             |                                                           |                                            | (Kerr<br>et al.,2020)   |

Genes, method, N, mean age, BMI (body mass index), reported or calculated fold change, upregulated or downregulated genes, reference. Highlighted genes are those found in the intersection of comparisons between post-RYGB vs obese and lean vs obese. Bold font appoints significance.

## Lean vs obese

| Method      | Characteristics of the groups                                                                                                                                            |                                             | Gene expression fold change<br>(Lean vs Obese)                                                                                                                                                                                                                                                                                                                                                                                                                                                                                                                                                                                                                                                                                 |                                                                                                                                                                                                                                                                                                                                                                                                                                                                | Reference                                                                                                                                                                                                                                                                                                                                                                                                                                                                                                                                                                                      |                                                                                                                                                                                                                                                                                                                                                                                                                      |                              |
|-------------|--------------------------------------------------------------------------------------------------------------------------------------------------------------------------|---------------------------------------------|--------------------------------------------------------------------------------------------------------------------------------------------------------------------------------------------------------------------------------------------------------------------------------------------------------------------------------------------------------------------------------------------------------------------------------------------------------------------------------------------------------------------------------------------------------------------------------------------------------------------------------------------------------------------------------------------------------------------------------|----------------------------------------------------------------------------------------------------------------------------------------------------------------------------------------------------------------------------------------------------------------------------------------------------------------------------------------------------------------------------------------------------------------------------------------------------------------|------------------------------------------------------------------------------------------------------------------------------------------------------------------------------------------------------------------------------------------------------------------------------------------------------------------------------------------------------------------------------------------------------------------------------------------------------------------------------------------------------------------------------------------------------------------------------------------------|----------------------------------------------------------------------------------------------------------------------------------------------------------------------------------------------------------------------------------------------------------------------------------------------------------------------------------------------------------------------------------------------------------------------|------------------------------|
|             | Patients<br>data/ <b>Recruitment<br/>country</b>                                                                                                                         | BMI<br>(kg/m <sup>2</sup> )                 | Reported gene expression values<br>(Obese; Lean)                                                                                                                                                                                                                                                                                                                                                                                                                                                                                                                                                                                                                                                                               |                                                                                                                                                                                                                                                                                                                                                                                                                                                                | Calculated fold change<br>[(Lean/Obese)-1]                                                                                                                                                                                                                                                                                                                                                                                                                                                                                                                                                     |                                                                                                                                                                                                                                                                                                                                                                                                                      |                              |
|             |                                                                                                                                                                          |                                             | Upregulated expression in<br>lean (+)                                                                                                                                                                                                                                                                                                                                                                                                                                                                                                                                                                                                                                                                                          | Downregulated expression<br>in lean (-)                                                                                                                                                                                                                                                                                                                                                                                                                        |                                                                                                                                                                                                                                                                                                                                                                                                                                                                                                                                                                                                |                                                                                                                                                                                                                                                                                                                                                                                                                      |                              |
| <b>qPCR</b> | Candidate genes involved<br>in:<br>(a) Adipogenic markers<br>(b) Insulin signaling<br>pathway<br>(c) Remodeling of the<br>extracellular matrix (ECM)<br>(d) Inflammatory | <b>Lean:</b><br>83 lean<br>of ~23±2 years   | <b>Lean:</b><br>~22 ± 2                                                                                                                                                                                                                                                                                                                                                                                                                                                                                                                                                                                                                                                                                                        |                                                                                                                                                                                                                                                                                                                                                                                                                                                                |                                                                                                                                                                                                                                                                                                                                                                                                                                                                                                                                                                                                |                                                                                                                                                                                                                                                                                                                                                                                                                      |                              |
|             |                                                                                                                                                                          | <b>Obese:</b><br>19 obese<br>of ~26±5 years | <b>Obese:</b><br>~33 ± 3                                                                                                                                                                                                                                                                                                                                                                                                                                                                                                                                                                                                                                                                                                       |                                                                                                                                                                                                                                                                                                                                                                                                                                                                |                                                                                                                                                                                                                                                                                                                                                                                                                                                                                                                                                                                                |                                                                                                                                                                                                                                                                                                                                                                                                                      |                              |
|             | <b>Bialystok, Poland</b>                                                                                                                                                 |                                             |                                                                                                                                                                                                                                                                                                                                                                                                                                                                                                                                                                                                                                                                                                                                |                                                                                                                                                                                                                                                                                                                                                                                                                                                                |                                                                                                                                                                                                                                                                                                                                                                                                                                                                                                                                                                                                |                                                                                                                                                                                                                                                                                                                                                                                                                      |                              |
|             |                                                                                                                                                                          |                                             | <b>SLC2A4 (0.20; 0.49)</b><br>MAPK11 (0.04; 0.08)<br>TLR2 (0.01; 0.02)<br><b>CEBPB (0.10; 0.19)</b><br><b>IRS-2 (0.58; 0.9)</b><br><b>NFKBIA (0.17; 0.25)</b><br>PIK3CA (0.13; 0.19)<br>MAPK14 (0.56; 0.8)<br><b>ADIPOQ (0.48; 0.68)</b><br><b>PPARG (0.95; 1.34)</b><br><b>VEGFA (0.29; 0.41)</b><br><b>CEBPA (4.05; 5.69)</b><br>TLR4 (0.14; 0.19)<br><b>IRS-1 (0.59; 0.78)</b><br>NFKBIL1 (0.18; 0.23)<br>MMP2 (0.38; 0.48)<br><b>AKT2 (2.32; 2.9)</b><br>JUN (0.34; 0.42)<br>COL1A1 (0.78; 0.95)<br>MAPK8 (0.1; 0.12)<br>RELA (0.45; 0.5)<br>CCL3 (0.10; 0.11)<br>RASA1 (0.34; 0.37)<br>MAP3K1 (0.13; 0.14)<br>GRB2 (0.57; 0.6)<br>SREBF1 (0.28; 0.29)<br>MAPK1 (0.31; 0.32)<br>RAF1 (0.026; 0.028)<br>CD8A (0.010; 0.013) | IL-18 (0.03; 0.01)<br><b>MMP9 (0.26; 0.09)</b><br><b>CCL2 (0.1; 0.05)</b><br><b>CD14 (0.64; 0.35)</b><br><b>ITGAM (0.07; 0.04)</b><br><b>CD68 (0.31; 0.18)</b><br><b>ITGAX (0.11; 0.07)</b><br>CD19 (0.03; 0.02)<br><b>CD86 (0.03; 0.02)</b><br>NFKB2 (0.12; 0.09)<br><b>IKBKB (0.04; 0.03)</b><br><b>TIMP1 (0.34; 0.27)</b><br>MIF (0.36; 0.31)<br>CD40 (0.07; 0.06)<br>NFKB1 (0.08; 0.07)<br>CD4 (0.042; 0.040)<br>CD3D (0.02; 0.01)<br>FOXP3 (0.009; 0.007) | <b>Upregulated<br/>expression in lean</b><br><b>SLC2A4 (1.45)</b><br>MAPK11 (1.00)<br>TLR2 (1.00)<br><b>CEBPB (0.90)</b><br><b>IRS-2 (0.55)</b><br><b>NFKBIA (0.47)</b><br>PIK3CA (0.46)<br>MAPK14 (0.43)<br><b>ADIPOQ (0.42)</b><br><b>PPARG (0.41)</b><br><b>VEGFA (0.41)</b><br><b>CEBPA (0.40)</b><br>TLR4 (0.36)<br><b>IRS-1 (0.32)</b><br>NFKBIL1 (0.28)<br>MMP2 (0.26)<br><b>AKT2 (0.25)</b><br>JUN (0.24)<br>COL1A1 (0.22)<br>MAPK8 (0.2)<br>RELA (0.11)<br>CCL3 (0.10)<br>RASA1 (0.09)<br>MAP3K1 (0.08)<br>GRB2 (0.05)<br>SREBF1 (0.04)<br>MAPK1 (0.03)<br>RAF1 (0.08)<br>CD8A (0.30) | <b>Downregulated<br/>expression in lean (-)</b><br>IL-18 (-0.67)<br><b>MMP9 (-0.65)</b><br><b>CCL2 (-0.50)</b><br><b>CD14 (-0.45)</b><br><b>ITGAM (-0.43)</b><br><b>CD68 (-0.42)</b><br><b>ITGAX (-0.36)</b><br>CD19 (-0.33)<br><b>CD86 (-0.33)</b><br>NFKB2 (-0.25)<br><b>IKBKB (-0.25)</b><br><b>TIMP1 (-0.21)</b><br>MIF (-0.14)<br>CD40 (-0.14)<br>NFKB1 (-0.13)<br>CD4 (-0.05)<br>CD3D (-0.15)<br>FOXP3 (-0.22) | (Matulewicz<br>et al., 2017) |
|             |                                                                                                                                                                          |                                             | Note: Approximate values from<br>the graphs in the article                                                                                                                                                                                                                                                                                                                                                                                                                                                                                                                                                                                                                                                                     | Note: Approximate values from<br>the graphs in the article                                                                                                                                                                                                                                                                                                                                                                                                     |                                                                                                                                                                                                                                                                                                                                                                                                                                                                                                                                                                                                |                                                                                                                                                                                                                                                                                                                                                                                                                      |                              |

Genes, method, N, mean age, BMI (body mass index), reported or calculated fold change, upregulated or downregulated genes, reference. Highlighted genes are those found in the intersection of comparisons between post-RYGB vs obese and lean vs obese. Bold font appoints significance.

| Method                                                                                                              | Characteristics of the groups                    |                             | Gene expression fold change<br>(Lean vs Obese)                                                                                                                                                                                  |                                                                                                                                                                                                                                        |                                                          |                                               | Reference                   |
|---------------------------------------------------------------------------------------------------------------------|--------------------------------------------------|-----------------------------|---------------------------------------------------------------------------------------------------------------------------------------------------------------------------------------------------------------------------------|----------------------------------------------------------------------------------------------------------------------------------------------------------------------------------------------------------------------------------------|----------------------------------------------------------|-----------------------------------------------|-----------------------------|
|                                                                                                                     | Patients<br>data/ <b>Recruitment<br/>country</b> | BMI<br>(kg/m <sup>2</sup> ) | Microarrays                                                                                                                                                                                                                     |                                                                                                                                                                                                                                        | qPCR                                                     |                                               |                             |
|                                                                                                                     |                                                  |                             | Upregulated<br>expression in lean (+)                                                                                                                                                                                           | Downregulated<br>expression in lean (-)                                                                                                                                                                                                | Reported gene expression<br>values<br>(Obese; Lean)      | Calculated fold change<br>[(Lean/Obese)-1]    |                             |
| <b>Microarrays</b>                                                                                                  |                                                  |                             |                                                                                                                                                                                                                                 |                                                                                                                                                                                                                                        |                                                          |                                               |                             |
| Two-Color Microarray<br>Based Gene<br>Expression<br>Analysis/Low Input<br>Quick Amp Labeling<br>>18,000 transcripts | <b>Lean:</b><br>8 lean of ~36±9<br>years         | <b>Lean:</b><br>~24±1       | <b>ADPN, PPARG,<br/>IRS-2, CEBPB,<br/>MEF2A, MEF2D,<br/>MVD, ACSL1,<br/>ACSL3, GAPDHS,<br/>PGK1, LDHC,<br/>IRS, MAP3K2,<br/>MAP3K6, MAP3K9,<br/>MAP3K14, AKT1,<br/>ABCD1, CDKN2A,<br/>CASP4, CASP11,<br/>PNPLA3.</b>            | <b>RETN,<br/>PPARA,<br/>SREBP2,<br/>HKI,<br/>CD40LG,<br/>VTN,<br/>ALOX5,<br/>RAPGEF1,<br/>BAX,<br/>BAX,<br/>CYP7A1,<br/>CYP19A1</b>                                                                                                    | <b>Upregulated<br/>expression in lean (+)</b>            | <b>Upregulated expression<br/>in lean (-)</b> |                             |
|                                                                                                                     | <b>Obese:</b><br>8 obese of ~41±9<br>years       | <b>Obese:</b><br>~33±3      |                                                                                                                                                                                                                                 |                                                                                                                                                                                                                                        |                                                          |                                               |                             |
|                                                                                                                     |                                                  |                             |                                                                                                                                                                                                                                 |                                                                                                                                                                                                                                        |                                                          |                                               |                             |
| <b>qPCR</b>                                                                                                         | <b>qPCR</b>                                      |                             |                                                                                                                                                                                                                                 |                                                                                                                                                                                                                                        |                                                          |                                               |                             |
| qPCR validation of only<br>3 genes selected by the<br>author                                                        | <b>Lean:</b><br>35 patients                      |                             |                                                                                                                                                                                                                                 |                                                                                                                                                                                                                                        |                                                          |                                               | (Ronquillo<br>et al., 2019) |
|                                                                                                                     | <b>Obese:</b><br>37 obese                        |                             |                                                                                                                                                                                                                                 |                                                                                                                                                                                                                                        |                                                          |                                               |                             |
|                                                                                                                     | <b>Mexico City,<br/>Mexico</b>                   |                             | Note: They do not present<br>numeric expression values, only<br>that they are upregulated.                                                                                                                                      | Note: They do not present<br>numeric expression values,<br>only that they are<br>overexpressed.                                                                                                                                        |                                                          |                                               |                             |
|                                                                                                                     |                                                  |                             | Genes involved in:<br>(a) Endocrine function of the<br>adipocyte<br>(b) Cholesterol and triglyceride<br>synthesis<br>(c) Beta-oxidation of fatty acids<br>(d) Insulin signaling<br>(e) Leptin signaling<br>(f) Cytochromes p450 | Genes involved in:<br>(a) Glycolysis and<br>gluconeogenesis<br>(b) Inflammation<br>(c) Insulin signaling<br>(d) Leptin signaling<br>(e) TG synthesis<br>(f) Carbohydrate<br>metabolism<br>(g) Oxidative stress<br>(h) Cytochromes p450 |                                                          |                                               |                             |
| Note: In both cases, the<br>selection criteria are not<br>explained, only that<br>they are involved in<br>obesity.  |                                                  |                             |                                                                                                                                                                                                                                 |                                                                                                                                                                                                                                        |                                                          |                                               |                             |
|                                                                                                                     |                                                  |                             |                                                                                                                                                                                                                                 |                                                                                                                                                                                                                                        | Note: Approximate values<br>from graphics in the article |                                               |                             |

## Lean vs obese

| Method                                                                                              | Characteristics of the groups                                           |                          | Gene expression fold change (Lean vs Obese)                                                                        |                                                                                                                                          | Reference             |
|-----------------------------------------------------------------------------------------------------|-------------------------------------------------------------------------|--------------------------|--------------------------------------------------------------------------------------------------------------------|------------------------------------------------------------------------------------------------------------------------------------------|-----------------------|
|                                                                                                     | Patients data/ <b>Recruitment country</b>                               | BMI (kg/m <sup>2</sup> ) | Reported gene expression                                                                                           |                                                                                                                                          |                       |
|                                                                                                     |                                                                         |                          | Upregulated genes in lean (+)                                                                                      | Downregulated genes in lean (-)                                                                                                          |                       |
| <b>Microarrays</b>                                                                                  |                                                                         |                          | 91 upregulated genes in lean                                                                                       | 130 downregulated genes in lean                                                                                                          |                       |
| Affymetrix Human Gene 2.1ST array 10,000 transcripts                                                | <b>Lean:</b><br>9 lean of 50 ± 3 years                                  | <b>Lean:</b><br>~22 ± 2  | <i>PPP1R1B</i><br><i>NPR1</i><br><i>HCAR3</i><br><i>P1K3CA</i>                                                     | <i>CCL19</i><br><i>CXCL10</i><br><i>CXCL11</i><br><i>TNFRSF11A</i><br><i>TNFRSF25</i><br><i>PDGFA</i><br><i>GNB4</i><br><i>ADCY1</i>     | (Badoud et al., 2017) |
| Genes involved in:<br>(a) Cytokine-cytokine receptor interaction<br>(b) Chemokine signaling pathway | <b>Obese:</b><br>11 Obese of 46 ± 1 years<br><br><b>Ontario, Canada</b> | <b>Obese:</b><br>~35 ± 1 | Note:<br>Significantly upregulated genes involved in:<br>(a) Lipolysis in adipocytes<br>(b) cAMP signaling pathway | Note:<br>Significantly downregulated genes involved in:<br>(a) Cytokine-cytokine receptor interaction<br>(b) Chemokine signaling pathway |                       |

Genes, method, N, mean age, BMI (body mass index), reported or calculated fold change, upregulated or downregulated genes, reference. Highlighted genes are those found in the intersection of comparisons between post-RYGB vs obese and lean vs obese. Bold font appoints significance.
